# Supplementary material for: A palmitoyl transferase chemical–genetic system to map ZDHHC-specific S-acylation
Source: PubMed Central journal article supplement (PMC11471619; doi:10.1038/s41587-023-02030-0), 2024-01-08
Supplement: 41587_2023_2030_MOESM1_ESM.pdf [file 41587_2023_2030_MOESM1_ESM.pdf]

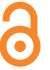

---

# A palmitoyl transferase chemical–genetic system to map ZDHHC-specific *S*-acylation

---

In the format provided by the authors and unedited

---

**Table of contents****Page**

|                                                       |    |
|-------------------------------------------------------|----|
| 1. Synthetic Methods and Characterization Data        | 2  |
| 2. Supplementary Tables                               | 18 |
| 3. Supplementary Figures                              | 25 |
| 4. Supplementary Information – References             | 35 |
| 5. Uncropped Scans of Supplementary Information blots | 36 |

## Synthetic Methods and Characterization Data

Scheme 1. Synthetic scheme to bumped fatty acid probes.

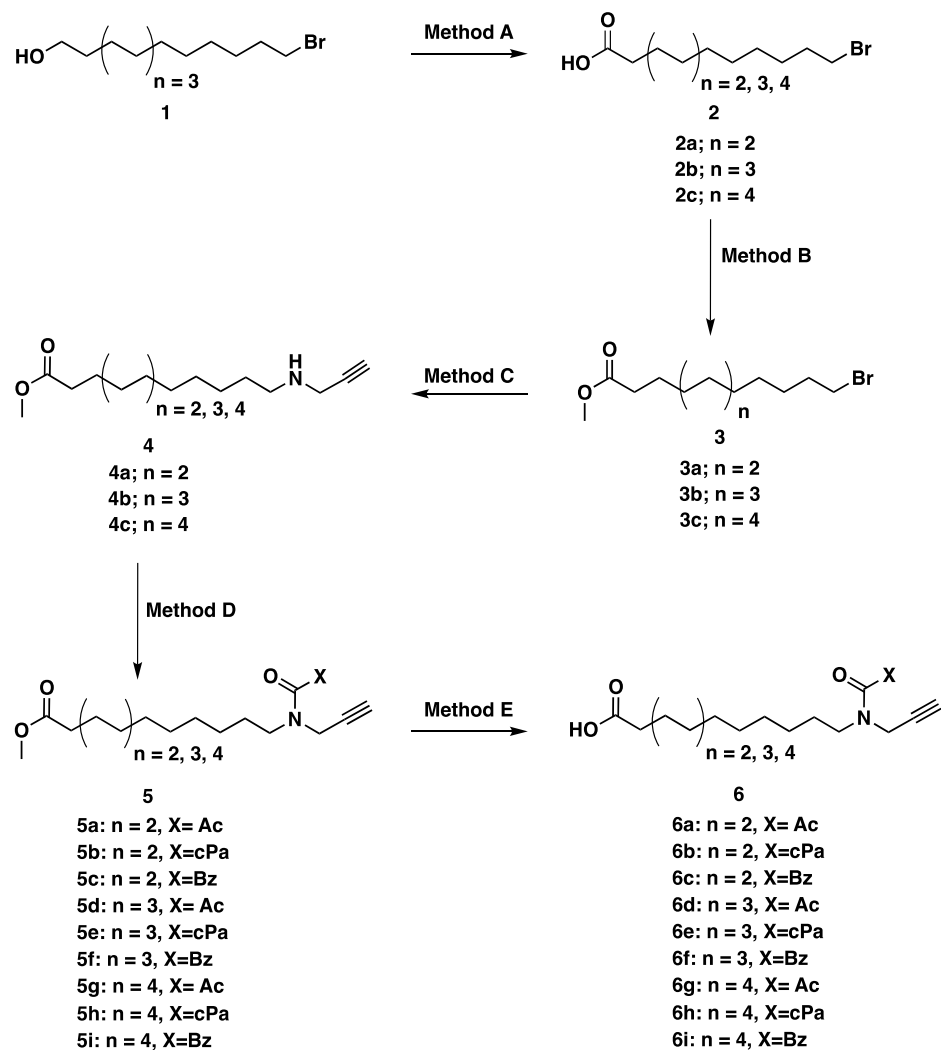

# 12-(N-(prop-2-yn-1-yl)acetamido)dodecanoic acid (6a; 16-Ac)

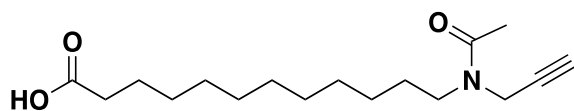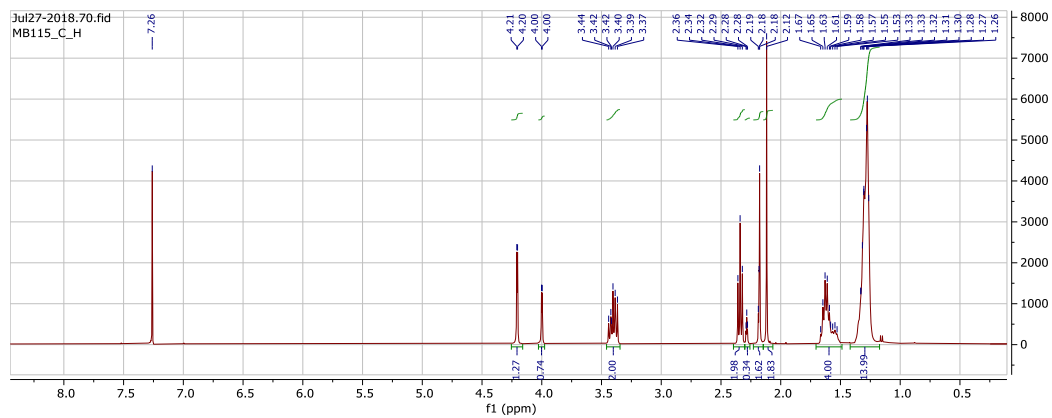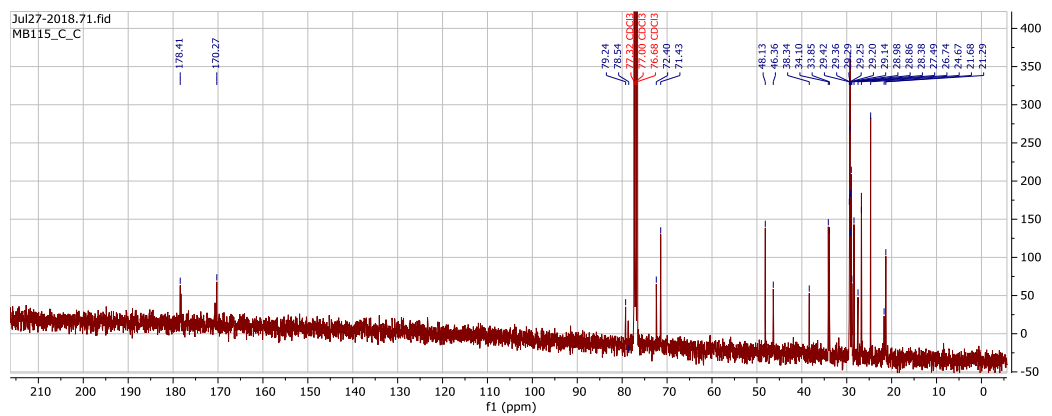

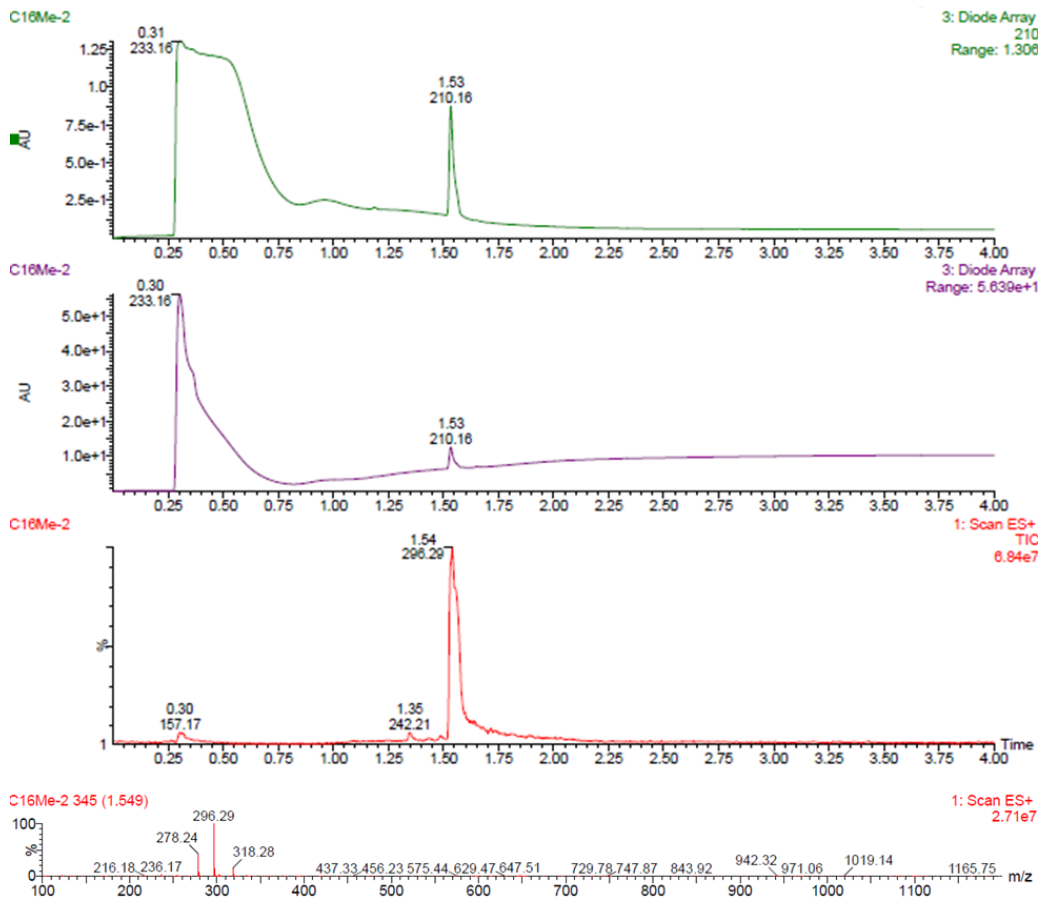

**12-(N-(prop-2-yn-1-yl)cyclopropanecarboxamido)dodecanoic acid (6b; 16-cPr)**

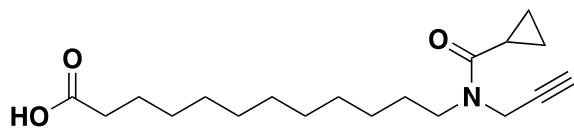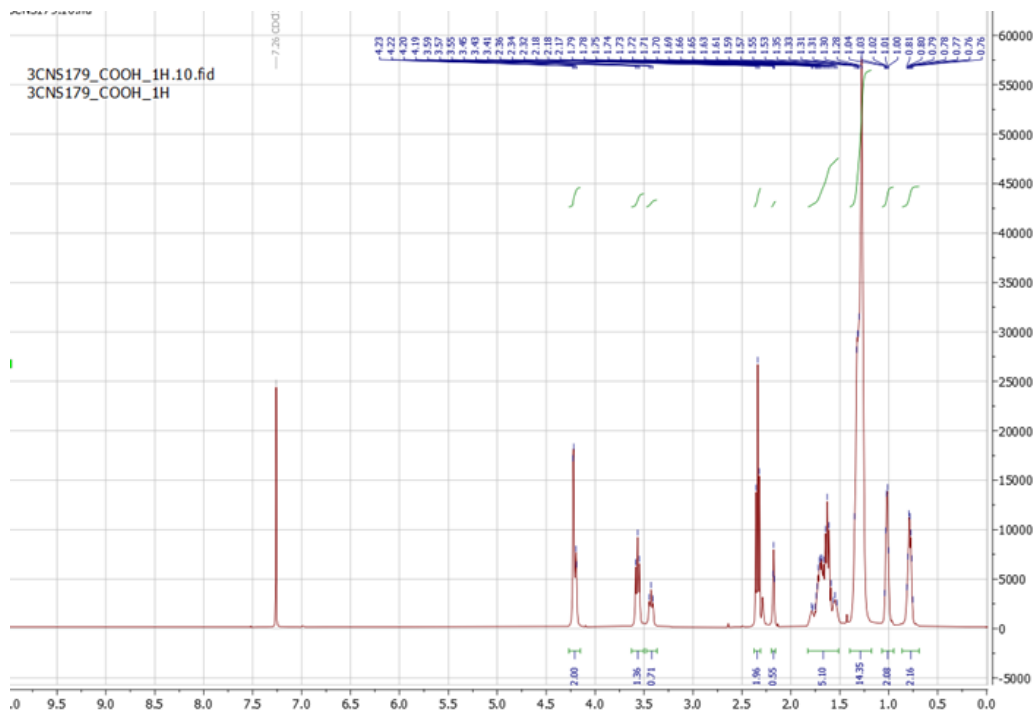

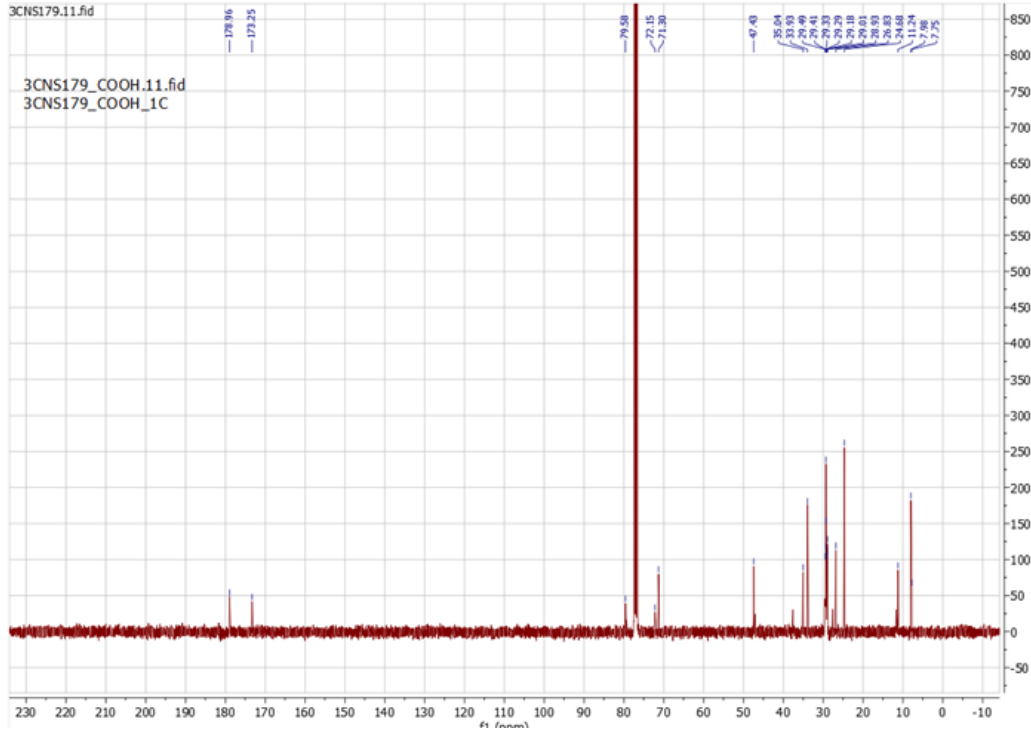

C18cyclo-2 3: Diode Array 210 Range: 1.307

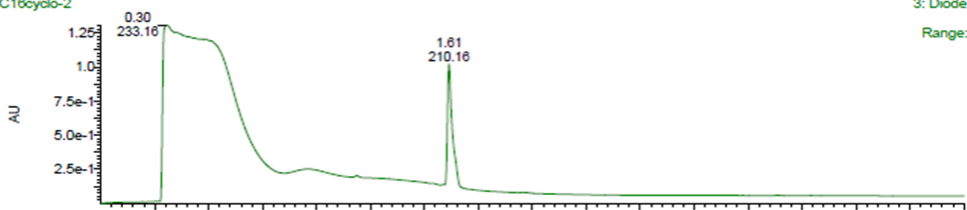

C18cyclo-2 3: Diode Array Range: 5.641e+1

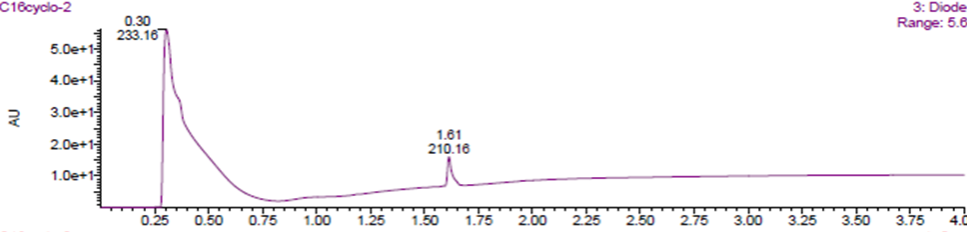

C18cyclo-2 1: Scan ES+ TIC 5.60e7

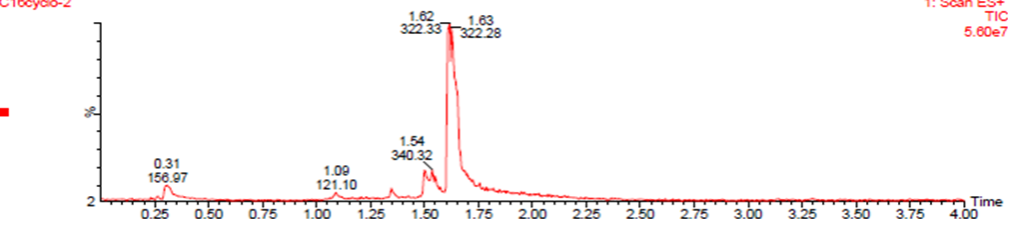

C18cyclo-2 381 (1.621) 1: Scan ES+ 2.29e7

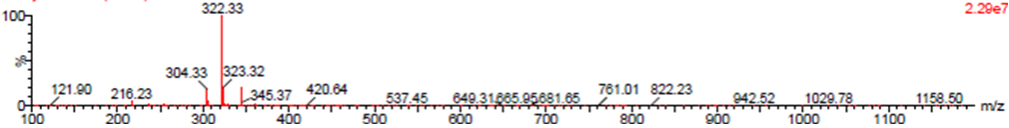

# 12-(N-(prop-2-yn-1-yl)benzamido)dodecanoic acid (6c; 16-Bz)

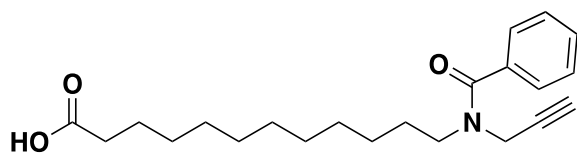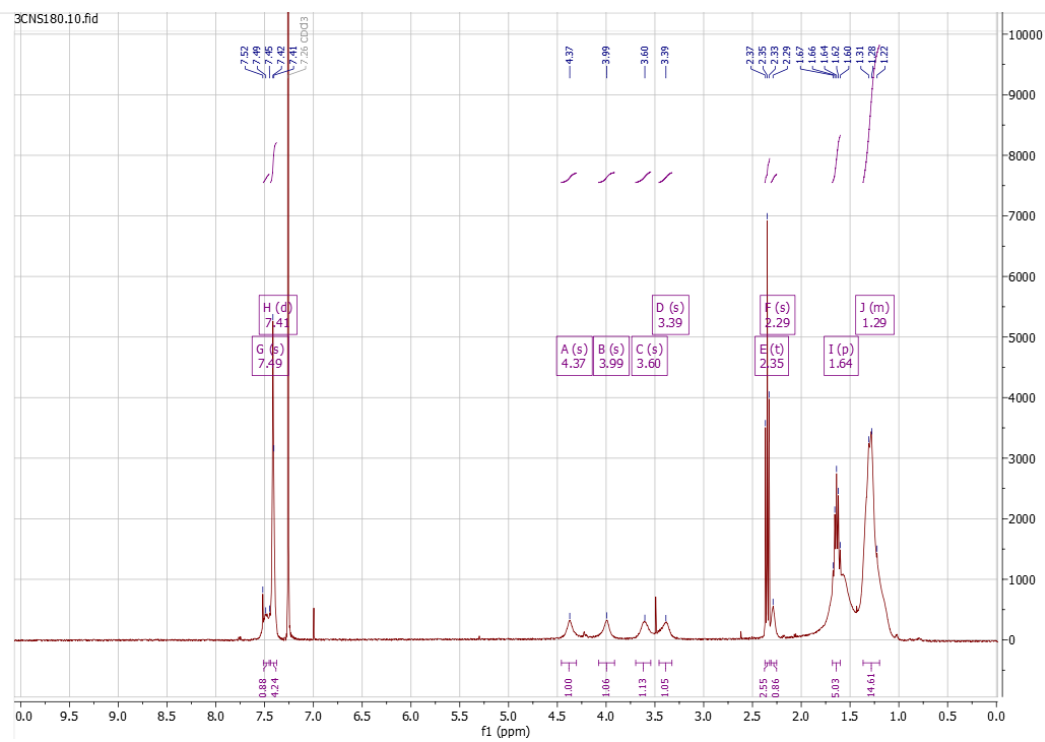

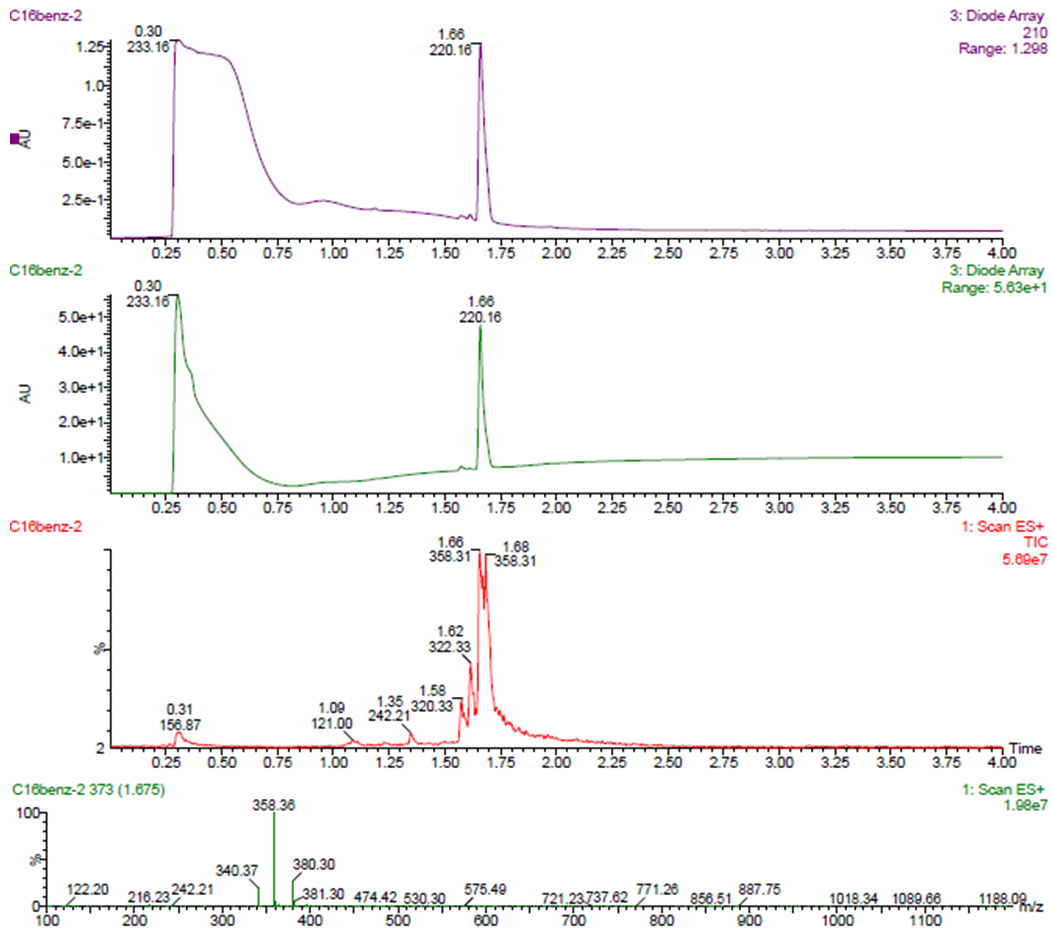

**14-(N-(prop-2-yn-1-yl)acetamido)tetradecanoic acid (6d; 18-Ac)**

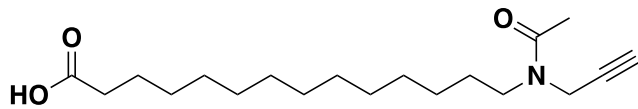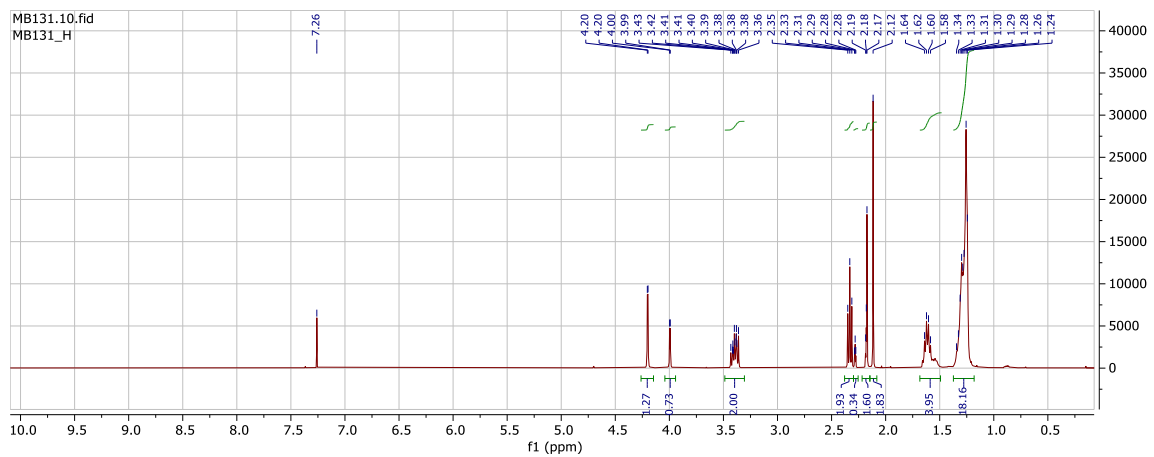



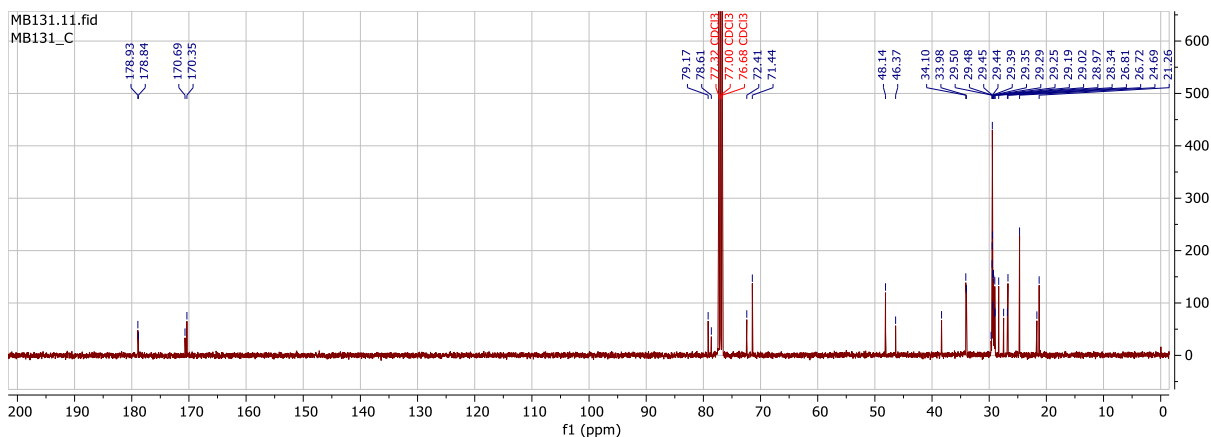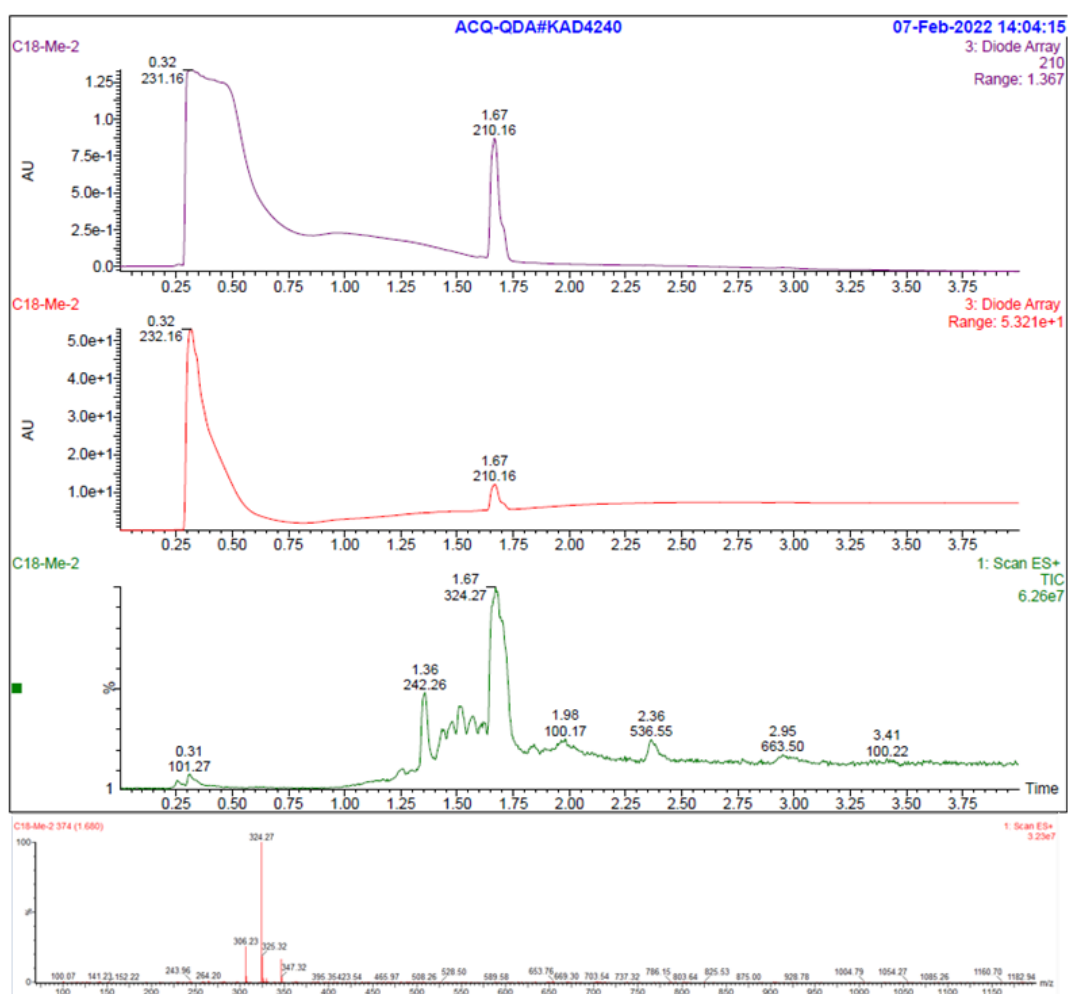

14-(N-(prop-2-yn-1-yl)cyclopropanecarboxamido)tetradecanoic acid (6e; 18-cPr)

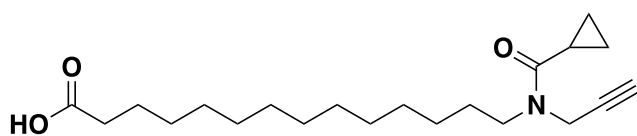

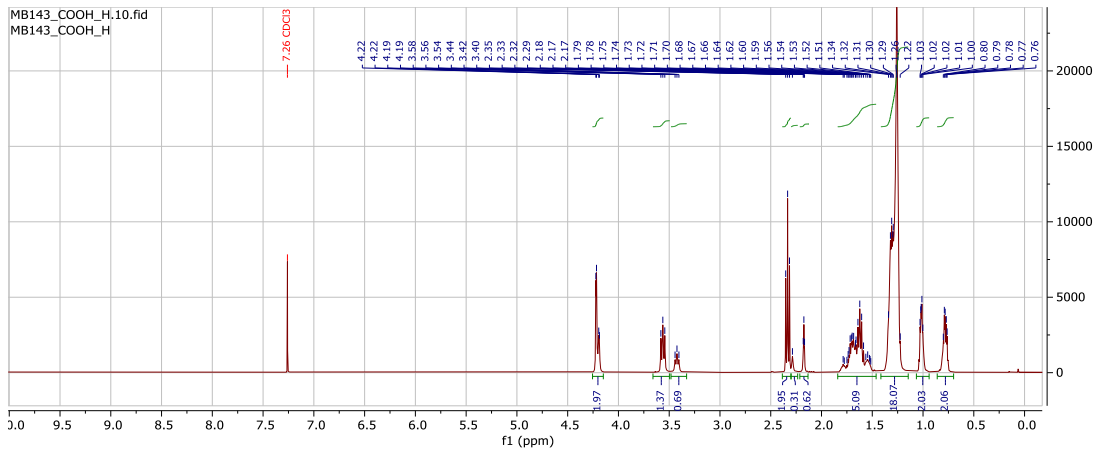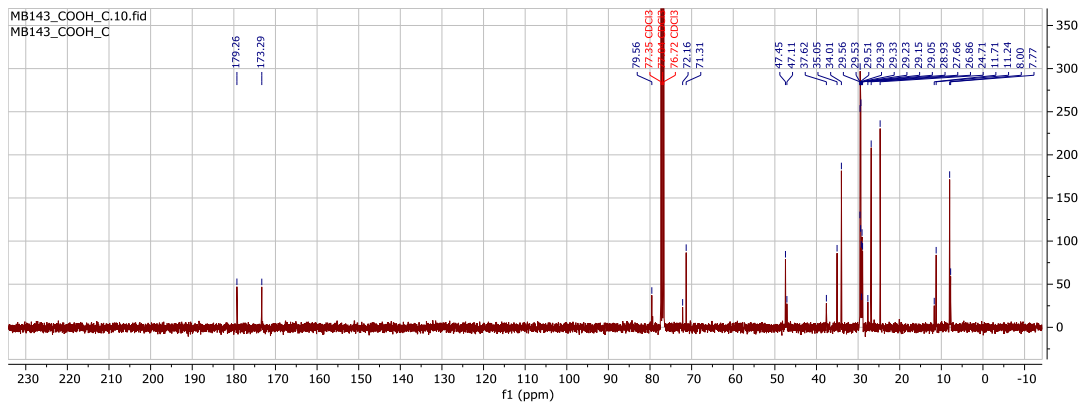

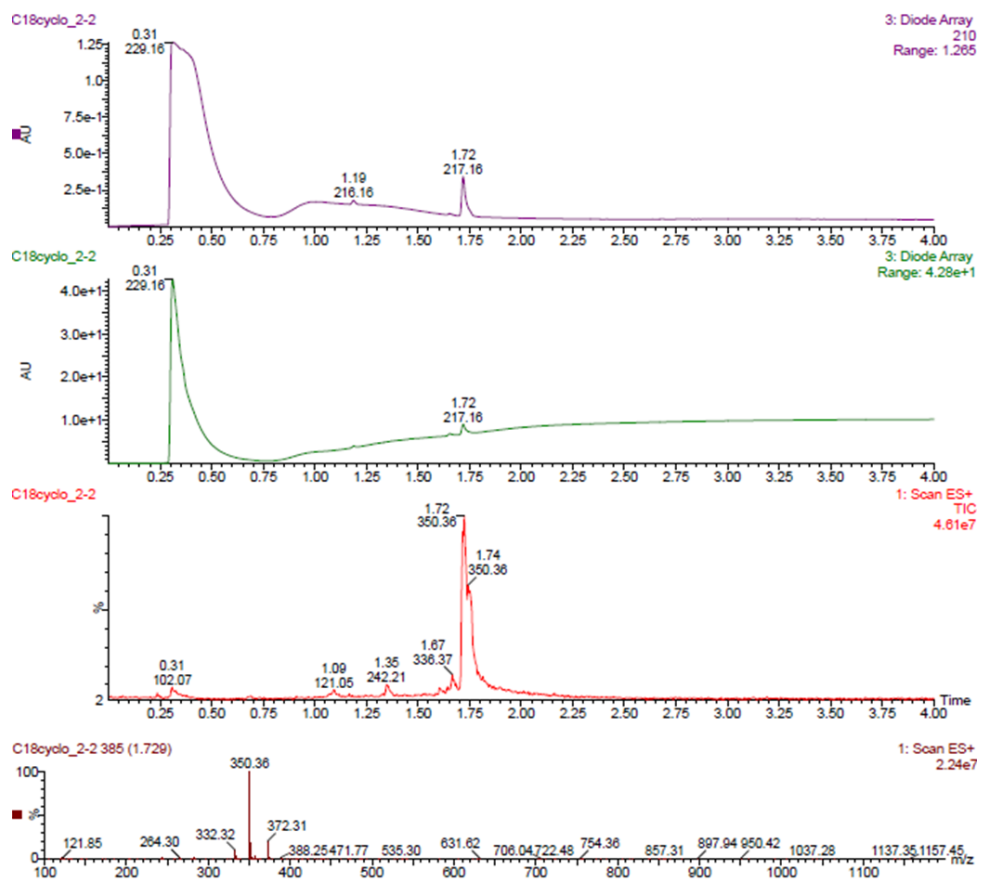

**14-(N-(prop-2-yn-1-yl)benzamido)tetradecanoic acid (6f; 18-Bz)**

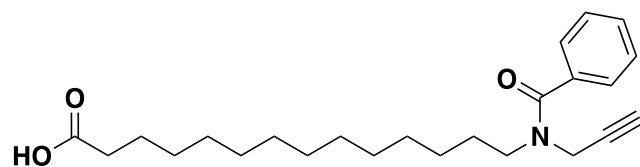

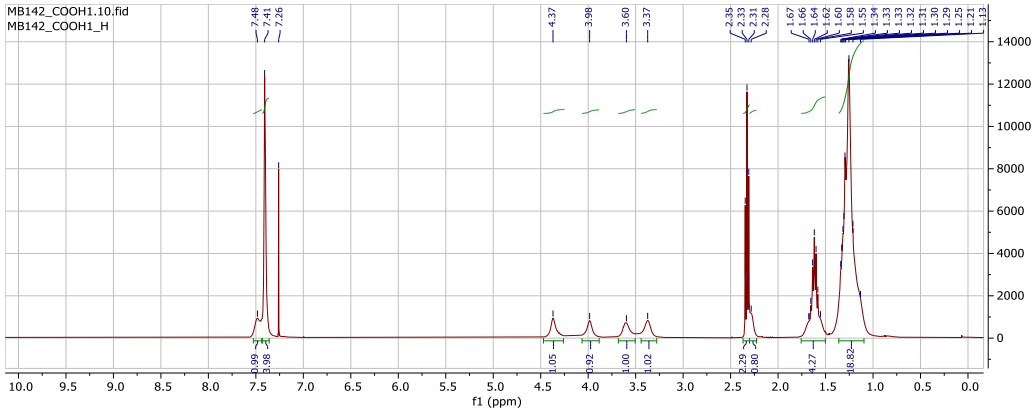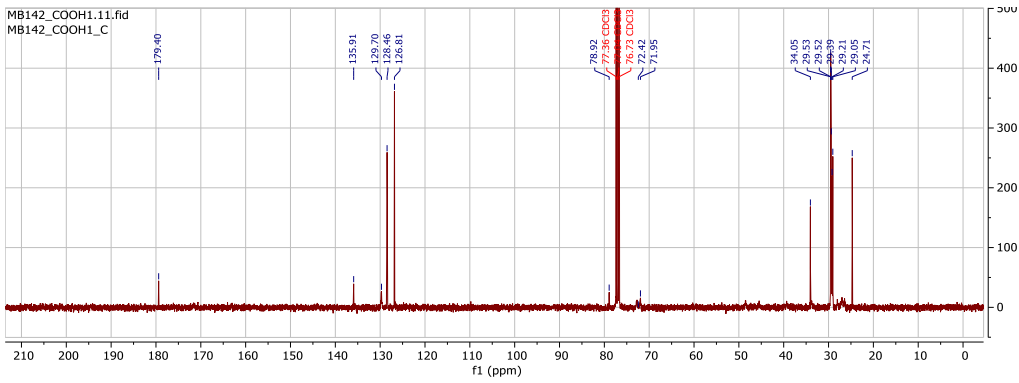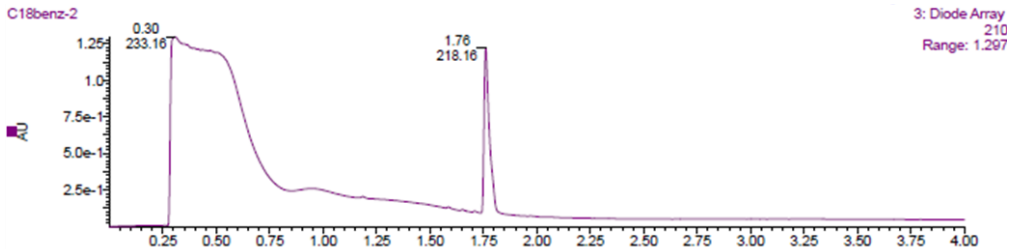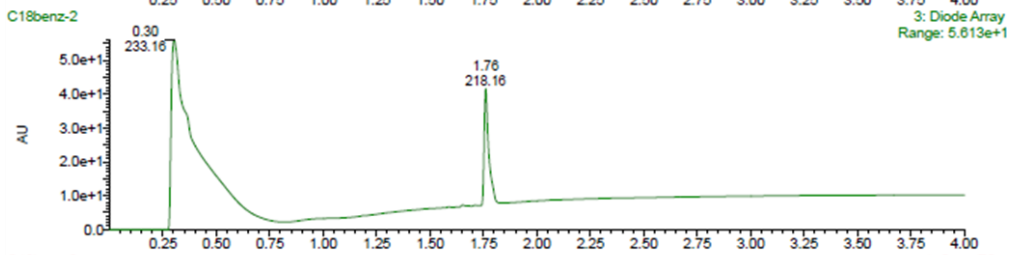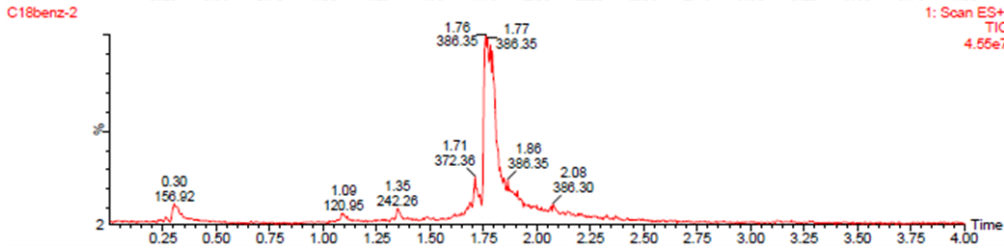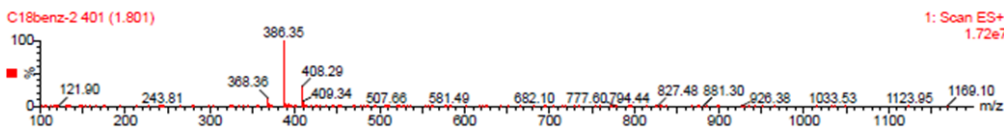

16-(N-(prop-2-yn-1-yl)acetamido)hexadecanoic acid (6g; 20-Ac)

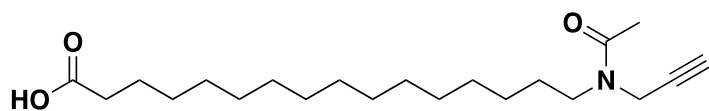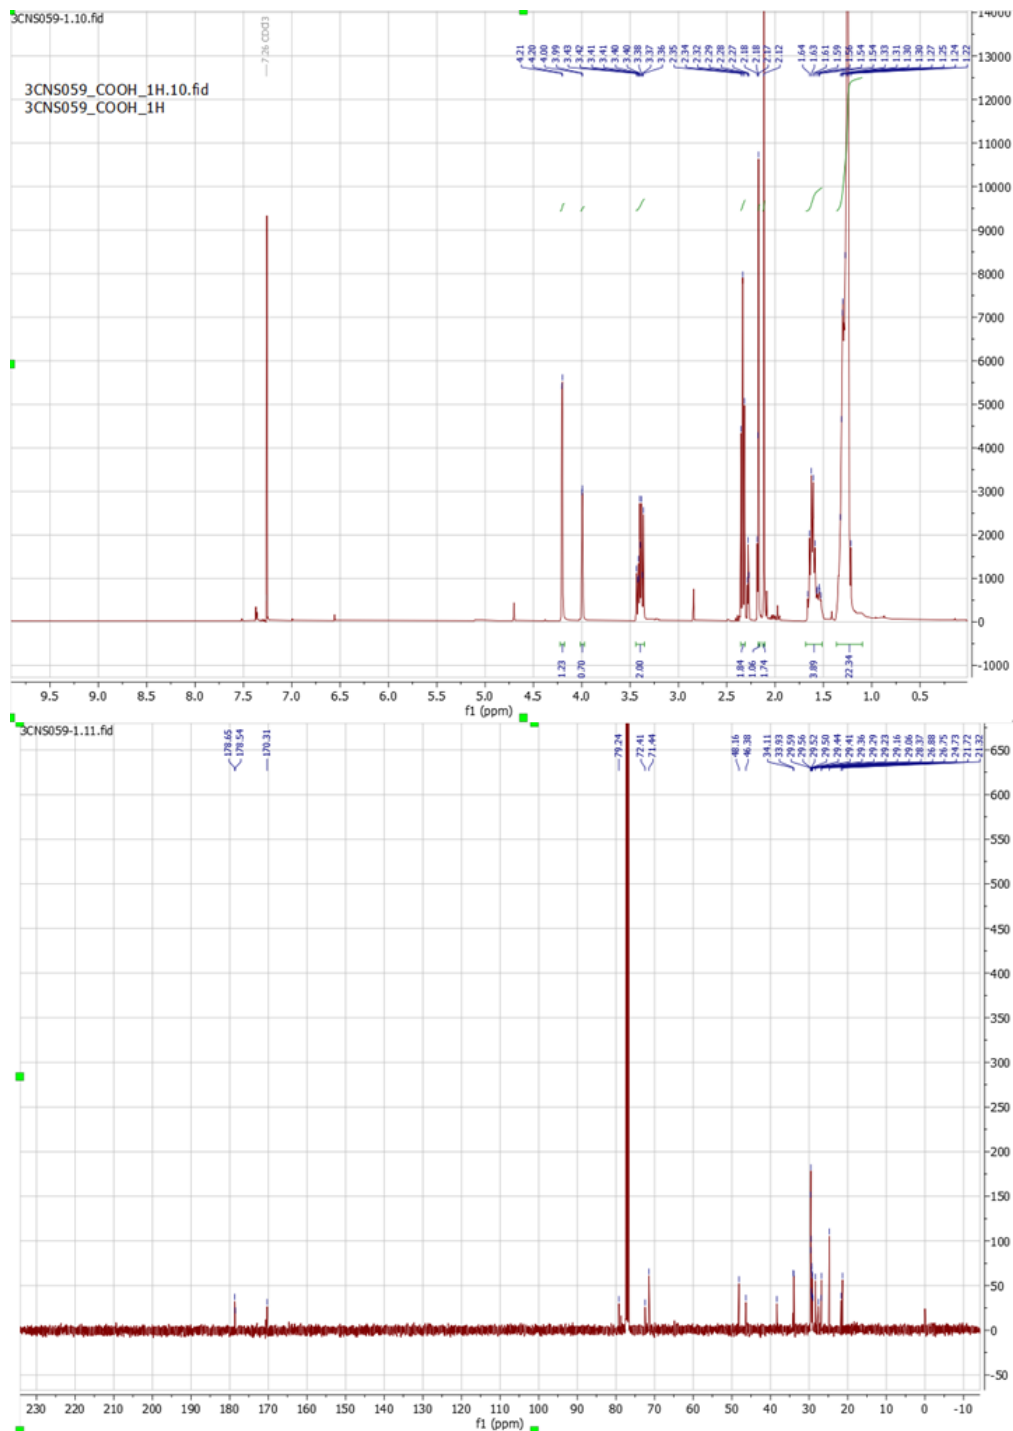

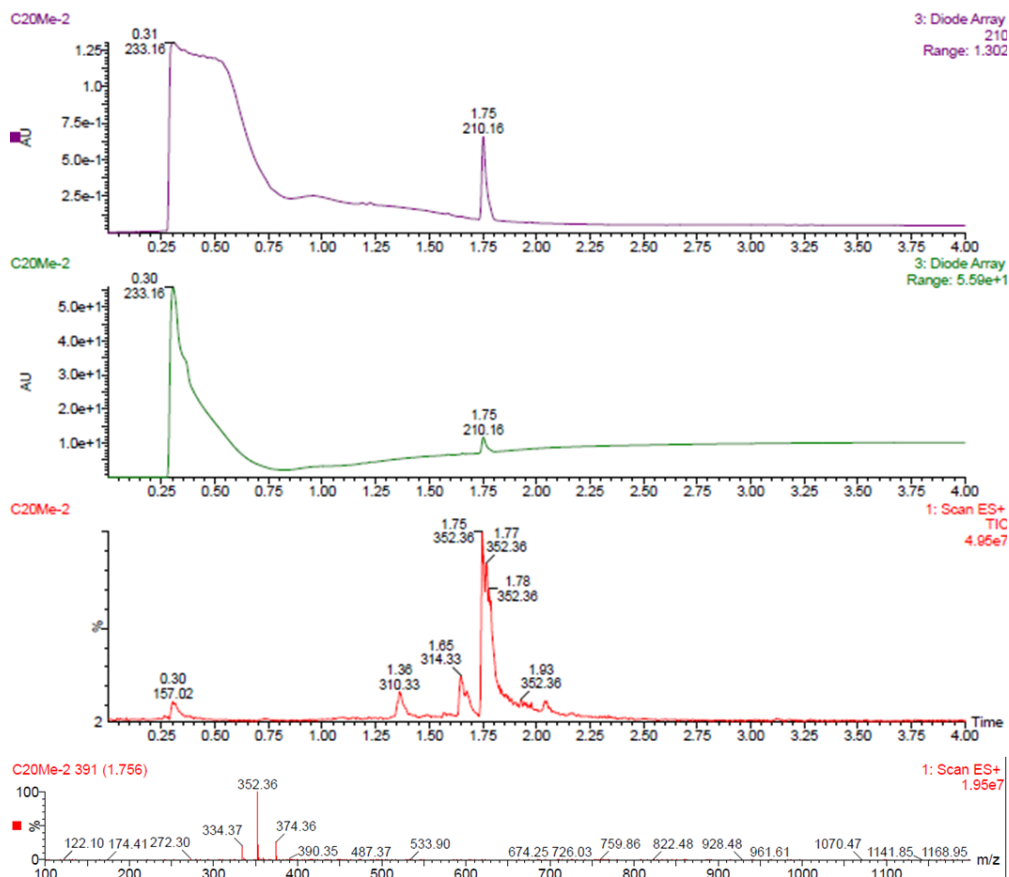

**16-(N-(prop-2-yn-1-yl)cyclopropanecarboxamido)hexadecanoic acid (6h; 20-cPr)**

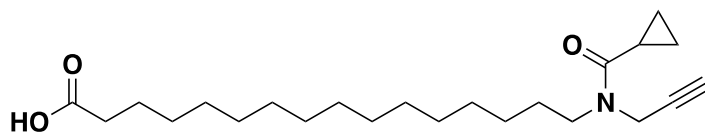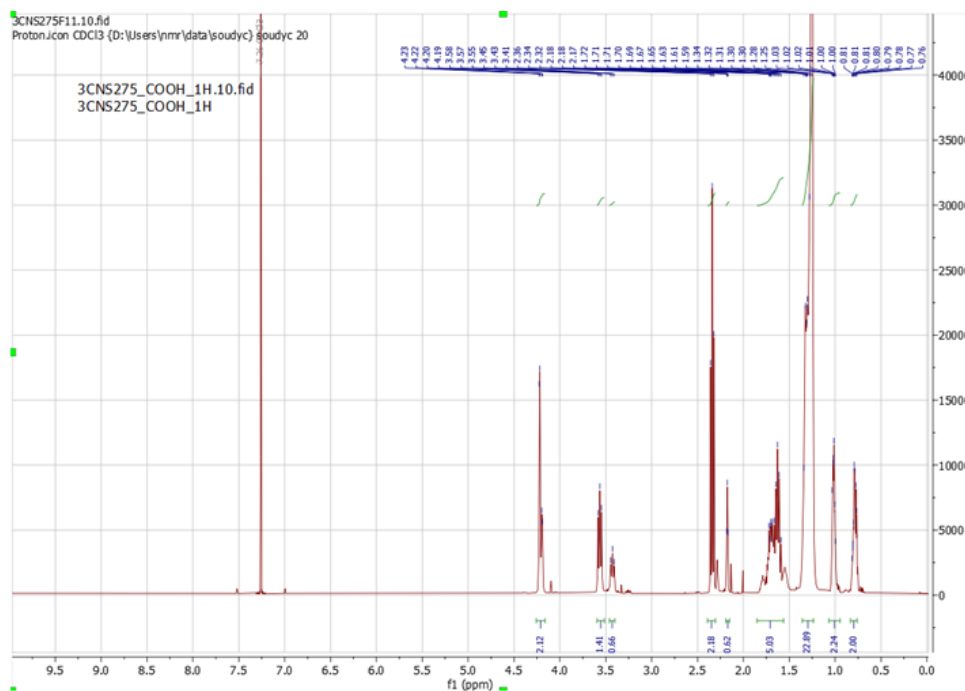

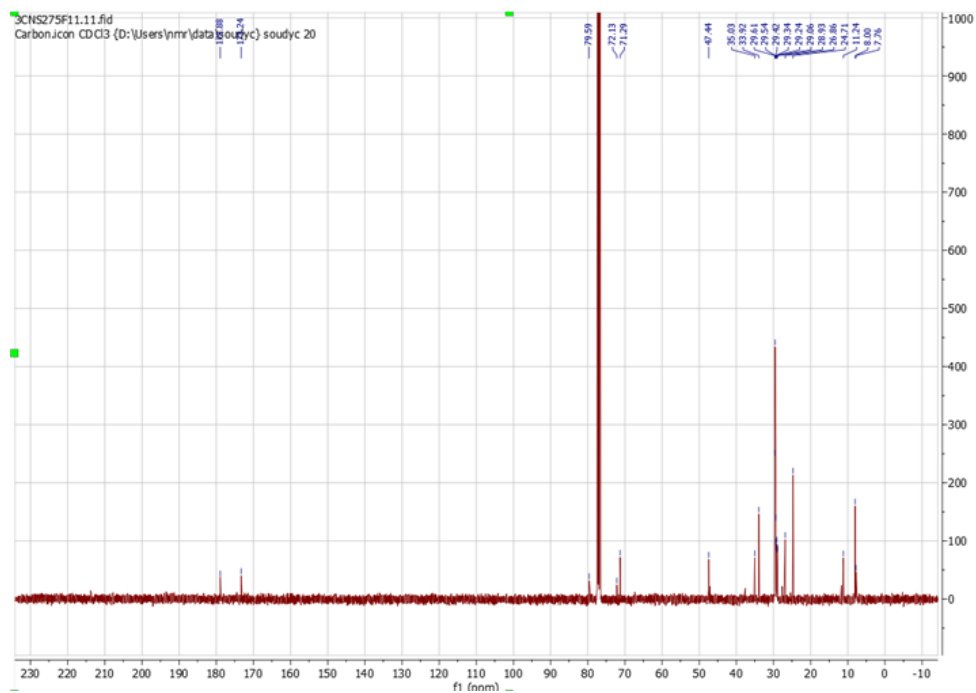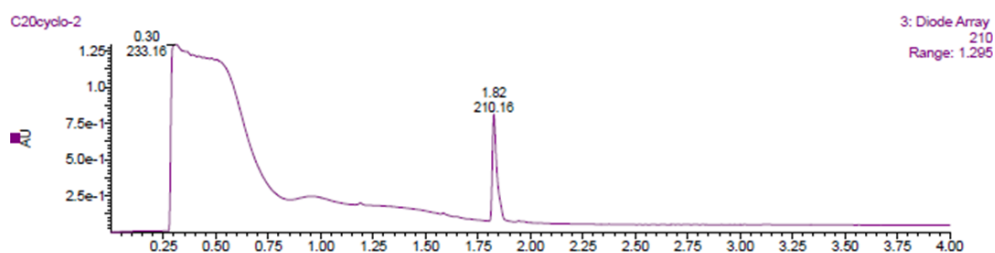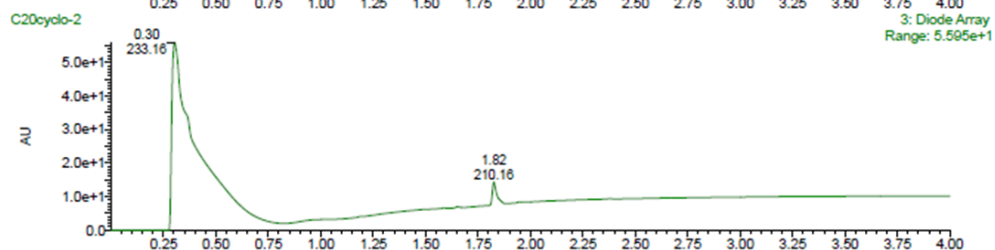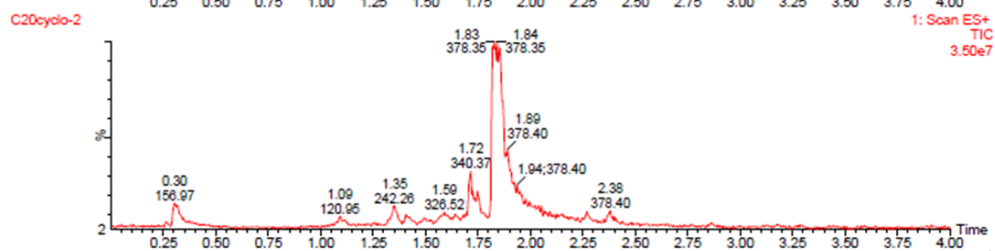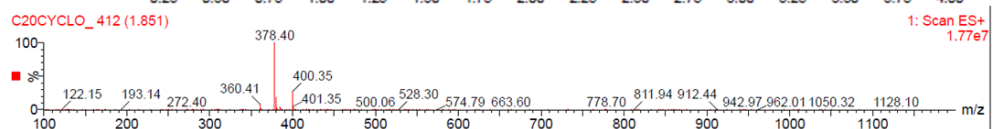

16-(N-(prop-2-yn-1-yl)benzamido)hexadecanoic acid (6i; 20-Bz)

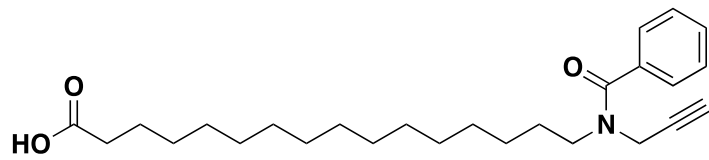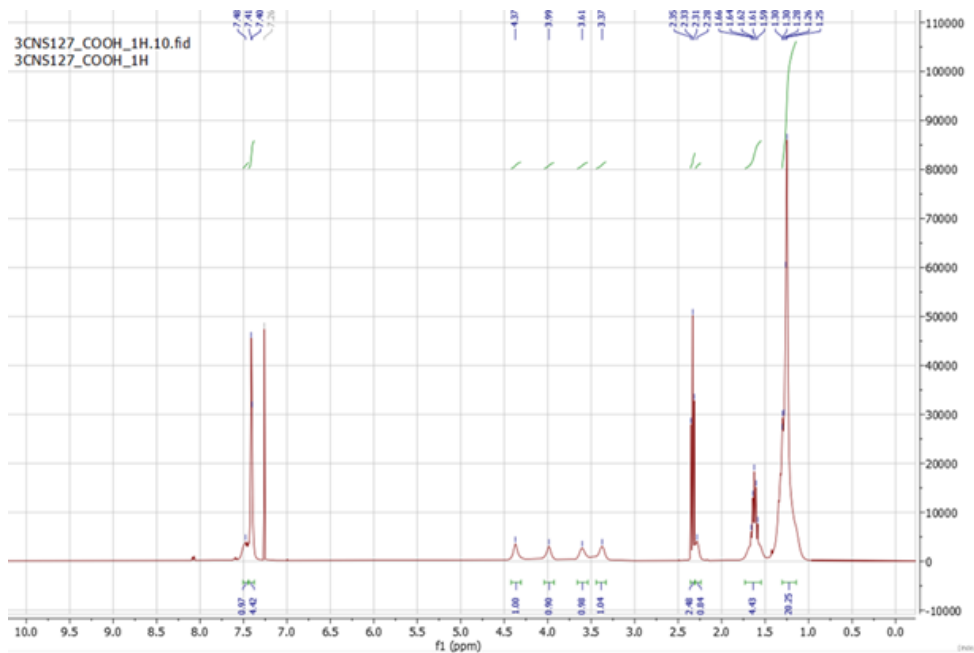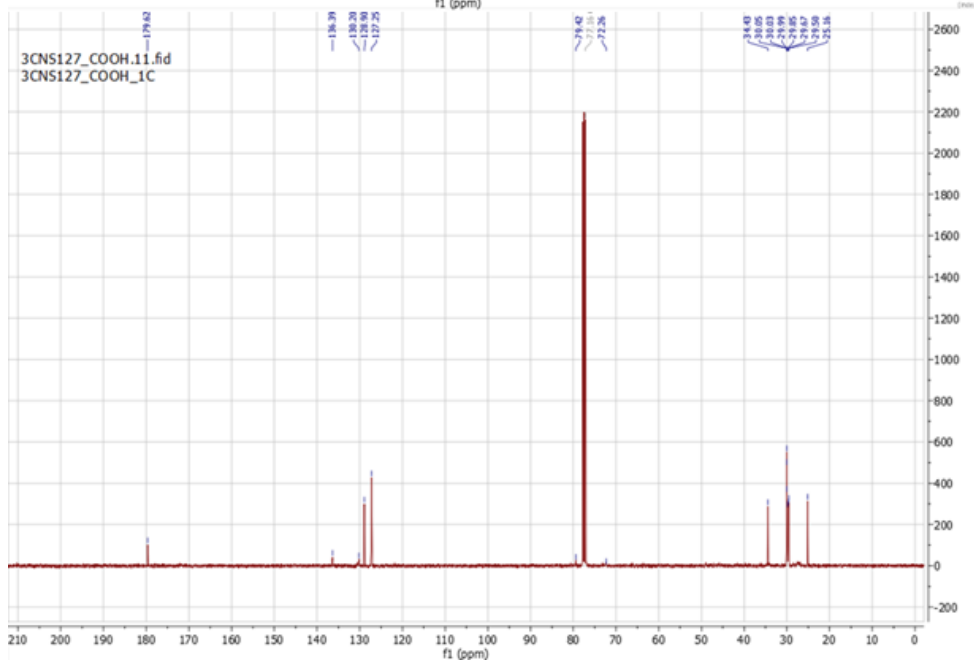



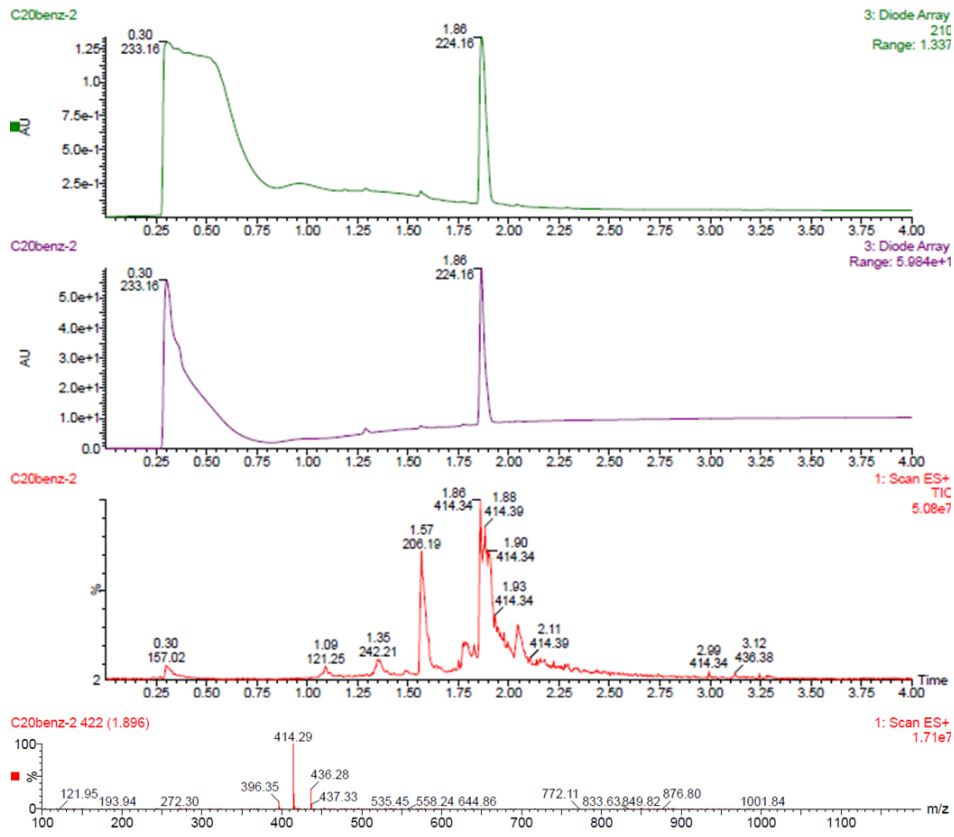

### C18-Bz-CoA probe

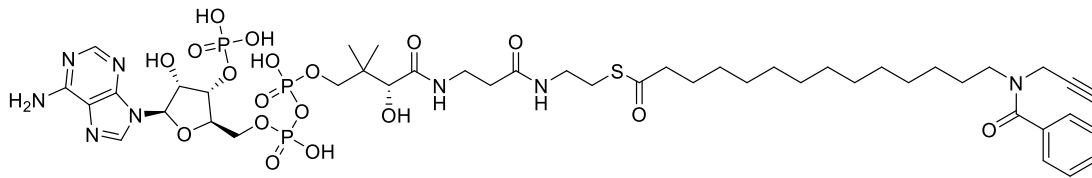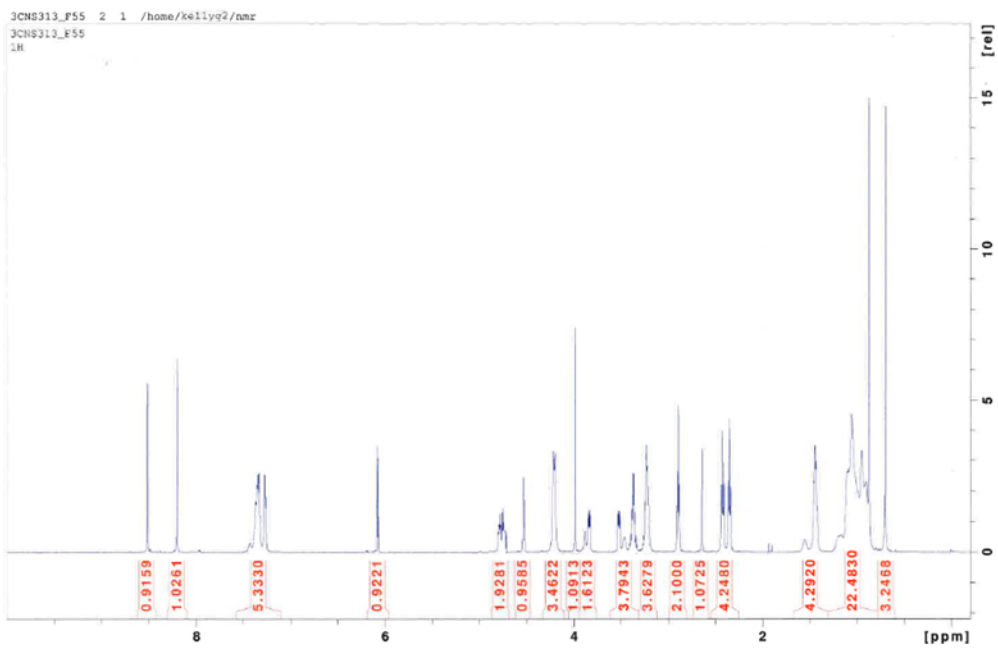

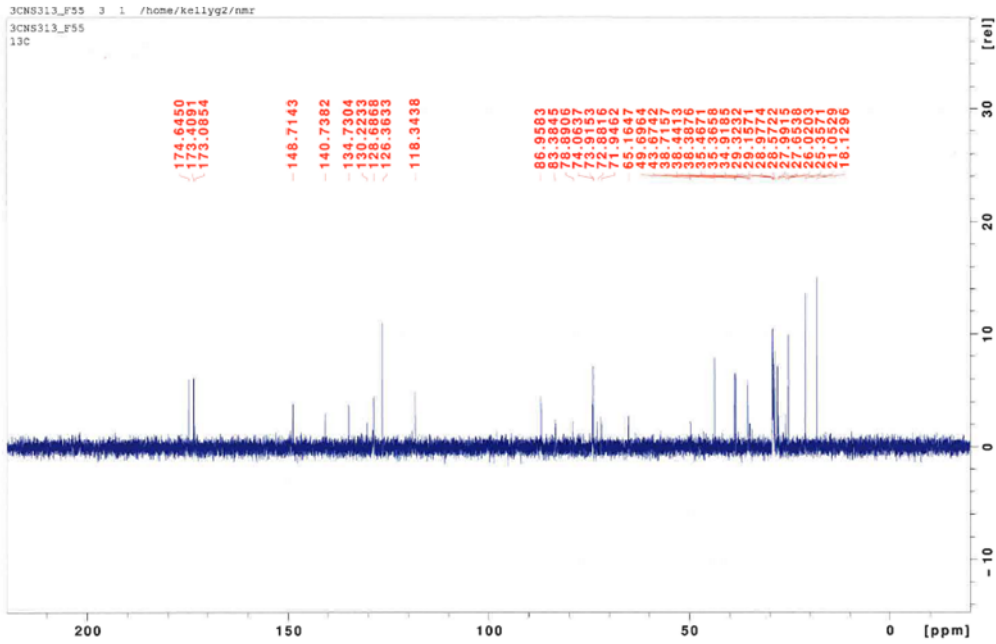

Sample 1 Vial 1:2 ID 3CNS313 File 3CNS313 Date 25-Sep-2020 Time 09:22:35 Description

3: UV Detector: TAC: Wavelength Range: (210 - 400) Smooth (Mn, 2x3) 1.361e+2  
 Range: 1.368e+2

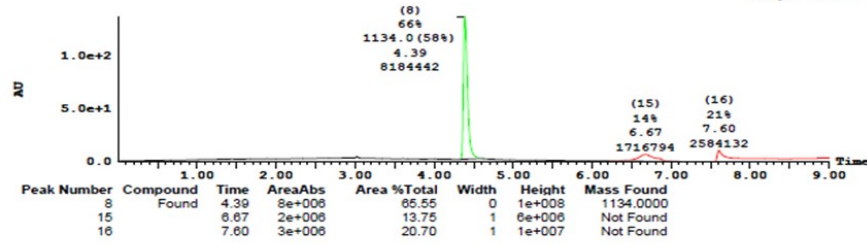

3: UV Detector: 210 Nm Smooth (Mn, 1x1) 2.782  
 Range: 2.9

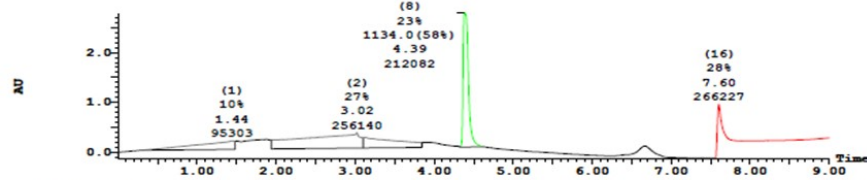

1: MS ES+ :TIC Smooth (Mn, 1x1) 3.3e+007

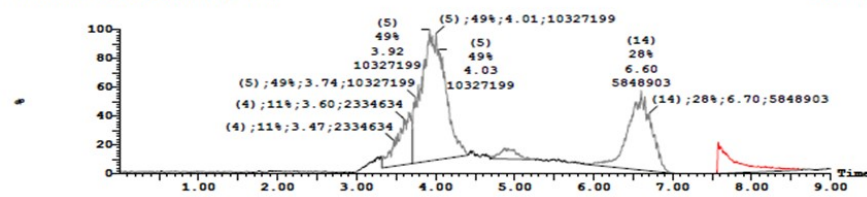

Peak ID Compound Time Mass Found  
 8 Found 4.38 1135  
 8:(Time: 4.39) Combine (965:987-(932:942+1011:1021)) 1:MS ES+  
 1.0e+006

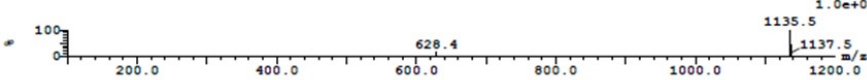

## Supplementary Tables

Supplementary Table 1. Kinetic analysis of WT, Y181G, C156S and Y181G/C156S ZDHHC20 expression constructs with YnPal-CoA and 18-Bz-CoA.

|                                                 | <b>WT-ZDHHC20</b> |                   |
|-------------------------------------------------|-------------------|-------------------|
| <b>Kinetic Parameters</b>                       | <b>Pal-CoA</b>    | <b>C18-Bz-CoA</b> |
| Vmax ( $\mu\text{M NADH}\cdot\text{min}^{-1}$ ) | 0.45 $\pm$ 0.006  | na                |
| Kcat ( $\text{min}^{-1}$ )                      | 22.5 $\pm$ 0.3    | na                |
| Km ( $\mu\text{M}$ )                            | 3.3 $\pm$ 0.2     | na                |
| Kcat/Km ( $\mu\text{M}\cdot\text{min}^{-1}$ )   | 6.8 $\pm$ 0.3     | na                |
|                                                 | <b>YG-ZDHHC20</b> |                   |
| <b>Kinetic Parameters</b>                       | <b>Pal-CoA</b>    | <b>C18-Bz-CoA</b> |
| Vmax ( $\mu\text{M NADH}\cdot\text{min}^{-1}$ ) | 0.45 $\pm$ 0.03   | 0.24 $\pm$ 0.01   |
| Kcat ( $\text{min}^{-1}$ )                      | 22.3 $\pm$ 1.5    | 11.8 $\pm$ 0.6    |
| Km ( $\mu\text{M}$ )                            | 2.9 $\pm$ 0.1     | 0.74 $\pm$ 0.02   |
| Kcat/Km ( $\mu\text{M}\cdot\text{min}^{-1}$ )   | 7.6 $\pm$ 0.3     | 16.0 $\pm$ 1.0    |

Supplementary Table 2. List of vectors used in this study

| <b>Plasmid</b>                             | <b>Associated Projects</b> | <b>Source</b>                                                                     |
|--------------------------------------------|----------------------------|-----------------------------------------------------------------------------------|
| ZDHHC20 (MYC-FLAG-tagged) Human (CFlagD20) | ZDHHC Mammalian Expression | Origene Technologies #RC215317                                                    |
| N-3XFLAG-ZDHHC01                           | ZDHHC Mammalian Expression | Gifted by Dr Yusuke Ohno, Faculty of Pharmaceutical Sciences, Hokkaido University |
| N-3XFLAG-ZDHHC02                           | ZDHHC Mammalian Expression | Gifted by Dr Yusuke Ohno, Faculty of Pharmaceutical Sciences, Hokkaido University |
| N-3XFLAG-ZDHHC03                           | ZDHHC Mammalian Expression | Gifted by Dr Yusuke Ohno, Faculty of Pharmaceutical Sciences, Hokkaido University |
| N-3XFLAG-ZDHHC04                           | ZDHHC Mammalian Expression | Gifted by Dr Yusuke Ohno, Faculty of Pharmaceutical Sciences, Hokkaido University |
| N-3XFLAG-ZDHHC05                           | ZDHHC Mammalian Expression | Gifted by Dr Yusuke Ohno, Faculty of Pharmaceutical Sciences, Hokkaido University |
| N-3XFLAG-ZDHHC06                           | ZDHHC Mammalian Expression | Gifted by Dr Yusuke Ohno, Faculty of Pharmaceutical Sciences, Hokkaido University |
| N-3XFLAG-ZDHHC07                           | ZDHHC Mammalian Expression | Gifted by Dr Yusuke Ohno, Faculty of Pharmaceutical Sciences, Hokkaido University |
| N-3XFLAG-ZDHHC08                           | ZDHHC Mammalian Expression | Gifted by Dr Yusuke Ohno, Faculty of Pharmaceutical Sciences, Hokkaido University |
| N-3XFLAG-ZDHHC09                           | ZDHHC Mammalian Expression | Gifted by Dr Yusuke Ohno, Faculty of Pharmaceutical Sciences, Hokkaido University |
| N-HA-GCP16 (GOLGA7)                        | GCP16 Mammalian Expression | Gifted by Dr Yusuke Ohno, Faculty of Pharmaceutical Sciences, Hokkaido University |

|                                         |                                              |                                                                                                |
|-----------------------------------------|----------------------------------------------|------------------------------------------------------------------------------------------------|
| N-3XFLAG-ZDHHC11                        | ZDHHC Mammalian Expression                   | Gifted by Dr Yusuke Ohno, Faculty of Pharmaceutical Sciences, Hokkaido University              |
| N-3XFLAG-ZDHHC12                        | ZDHHC Mammalian Expression                   | Gifted by Dr Yusuke Ohno, Faculty of Pharmaceutical Sciences, Hokkaido University              |
| N-3XFLAG-ZDHHC13                        | ZDHHC Mammalian Expression                   | Gifted by Dr Yusuke Ohno, Faculty of Pharmaceutical Sciences, Hokkaido University              |
| N-3XFLAG-ZDHHC14                        | ZDHHC Mammalian Expression                   | Gifted by Dr Yusuke Ohno, Faculty of Pharmaceutical Sciences, Hokkaido University              |
| C-3XFLAG-ZDHHC15                        | ZDHHC Mammalian Expression                   | Gifted by Dr Yusuke Ohno, Faculty of Pharmaceutical Sciences, Hokkaido University              |
| N-3XFLAG-ZDHHC16                        | ZDHHC Mammalian Expression                   | Gifted by Dr Yusuke Ohno, Faculty of Pharmaceutical Sciences, Hokkaido University              |
| N-3XFLAG-ZDHHC17                        | ZDHHC Mammalian Expression                   | Gifted by Dr Yusuke Ohno, Faculty of Pharmaceutical Sciences, Hokkaido University              |
| N-3XFLAG-ZDHHC18                        | ZDHHC Mammalian Expression                   | Gifted by Dr Yusuke Ohno, Faculty of Pharmaceutical Sciences, Hokkaido University              |
| N-3XFLAG-ZDHHC19                        | ZDHHC Mammalian Expression                   | Gifted by Dr Yusuke Ohno, Faculty of Pharmaceutical Sciences, Hokkaido University              |
| N-3XFLAG-ZDHHC21                        | ZDHHC Mammalian Expression                   | Gifted by Dr Yusuke Ohno, Faculty of Pharmaceutical Sciences, Hokkaido University              |
| C-3XFLAG-ZDHHC22                        | ZDHHC Mammalian Expression                   | Gifted by Dr Yusuke Ohno, Faculty of Pharmaceutical Sciences, Hokkaido University              |
| N-3XFLAG-ZDHHC23                        | ZDHHC Mammalian Expression                   | Gifted by Dr Yusuke Ohno, Faculty of Pharmaceutical Sciences, Hokkaido University              |
| N-3XFLAG-ZDHHC24                        | ZDHHC Mammalian Expression                   | Gifted by Dr Yusuke Ohno, Faculty of Pharmaceutical Sciences, Hokkaido University              |
| 3XFLAG Vector (EF-1 $\alpha$ )          | Negative Control for ZDHHC Expression        | Gifted by Dr Yusuke Ohno, Faculty of Pharmaceutical Sciences, Hokkaido University              |
| C-FLAG-pcDNA3                           | Negative Control for ZDHHC Expression        | Addgene #20011                                                                                 |
| V5-Turbo-NES-pCDNA3                     | Proximity Based Labelling, BirA mutant       | BirA mutant, promiscuous biotin ligase, Addgene #107169                                        |
| pEGFP-N1-FLAG                           | GFP Fluorescence                             | Addgene #60360                                                                                 |
| Attb-ZDHHC20-BSDr-Vector (Mus Musculus) | Jump-In, Stable Targeted Integration of cDNA | Gifted by the Downward lab (The Francis Crick Institute), Generated In-House                   |
| pCMV-Int (PhiC31)                       | Jump-In, Stable Targeted Integration of cDNA | Gifted by the Downward lab (The Francis Crick Institute), Generated In-House, Addgene #18935   |
| pLVX-TetOne-Puro Vector                 | Lentiviral Transduction                      | Gifted by the Downward lab (The Francis Crick Institute), Generated In-House, Clontech #631849 |
| pCMV-VSV-G                              | Lentiviral Production                        | Gifted by the Downward lab (The Francis Crick Institute), Generated In-House, Addgene #8454    |
| pCMV-Delta-8.2                          | Lentiviral Packaging                         | Gifted by the Downward lab (The Francis Crick Institute), Generated In-House, Addgene #12263   |
| pcDNA3.1(+)-HA-Iftm3 (Mus Musculus)     | Iftm3 Mammalian Expression                   | Gifted by Dr Emmanuelle Thinon (Centre National de la Recherche Scientifique)                  |
| pcDNA3.1(+)-HA-VAMP3                    | VAMP3 Mammalian Expression                   | Gifted by Dr Emmanuelle Thinon (Centre National de la Recherche Scientifique)                  |

|                                  |                                    |                                                                               |
|----------------------------------|------------------------------------|-------------------------------------------------------------------------------|
| pcDNA3.1(+)-HA-VAMP3 (C76A)      | VAMP3 Mammalian Expression         | Gifted by Dr Emmanuelle Thinon (Centre National de la Recherche Scientifique) |
| pcDNA3.1(+)-XXYLT1-HA            | XXYLT1 Mammalian Expression        | Gifted by Dr Hans Bakker (Hannover Medical School)                            |
| pSpCas9(BB)-2A-Puro (PX459) V2.0 | Production of Gene Knock-Out Cells | Addgene #62988                                                                |

Supplementary Table 3. Primer sets used to generate PCR fragments for NEBuilder HiFi Assembly reactions.

| Plasmid               | Forward Primer (5' → 3')                                      | Reverse Primer (5' → 3')                                                                                                    | Backbone                            |
|-----------------------|---------------------------------------------------------------|-----------------------------------------------------------------------------------------------------------------------------|-------------------------------------|
| C-HA-D20              | AGGAGATCTGCCGCCGCGA<br>TATGGCGCCCTGGACGCTG                    | ATGACCGCGGCCGCGCCGTT<br>TTAAACCAGAACCTGAAGCG<br><b>TAATCTGGAACATCGTATGG</b><br><b>GTACAGGATATCATTTGCTG</b><br>CCAGATCCTCTTC | C-FLAG-D20                          |
| pLVX-C-FLAG-D20       | CTCGCAGGGGAGGTGGTCT<br>GTAAACCTTATCGTCGTCAT<br>CCTTGTAATCCAGG | CACTTCCTACCCTCGTAAAG<br>ATGGCGCCCTGGACGCTG                                                                                  | pLVX-TetOne-Puro                    |
| attb-C-FLAG-D20-BSDr  | CTCATCTCCGGGCCTTTTCGC<br>ATGGCGCCCTGGACGCTG                   | TGGCAACTAGAAGGCACAGC<br>TTAAACCTTATCGTCGTCATC<br>CTTGTAATCCAGG                                                              | attb-ZDHHC20-BSDr                   |
| pcDNA3.1(+)-HA-BCAP31 | TCCAGATTACGCTCTTATGG<br>GGATGAGTCTGCAGTGGACT<br>G             | GGTACCTCGAGAGATCTCGG<br>TTACTCTTCTTCTTGCCAT<br>G                                                                            | pcDNA3.1(+)-HA-lfitm3               |
| N-HA-PI4K2A           | CTTATGGCCATGGAGGCC<br>GAATCCCATGGACGAGAC                      | ATCCCCGCGGCCGCGGTAC<br>CCTACCACCATGAAAAGAAG                                                                                 | pDONR223-PI4K2A Addgene #23503      |
| N-HA-TOMM20           | CTTATGGCCATGGAGGCC<br>GAATCCCATGGTGGGTGCG                     | ATCCCCGCGGCCGCGGTAC<br>CTTATTCCACATCATCTTCAG<br>CC                                                                          | mCherry-TOMM20-N-10 Addgene #55146  |
| N-HA-TFAM             | CTTATGGCCATGGAGGCC<br>GAATCCCATGGCGTTTCTC                     | ATCCCCGCGGCCGCGGTAC<br>CTTAACACTCCTCAGCACC                                                                                  | pcDNA3-TFAM-mCLOVER Addgene #129574 |

Supplementary Table 4. Primer sets used to generate Turbo, EGFP and ZDHHC20 PCR fragments for NEBuilder HiFi Assembly reactions.

| Plasmid                | Forward Primer (5' → 3')                     | Reverse Primer (5' → 3')                                       | Backbone                         |
|------------------------|----------------------------------------------|----------------------------------------------------------------|----------------------------------|
| attb-N-Turbo-EGFP-BSDr | CTCATCTCCGGGCCTTTTCGC<br>A TGGGCAAGCCCATCCCC | CCTTGCTCACGTCCAGGGTC<br>AGGCGCTC                               | V5-Turbo-NES-pCDNA3              |
|                        | GACCCTGGACGTGAGCAAG<br>GGCGAGGAG             | TGGCAACTAGAAGGCACAGC<br>TTACTTGTACAGCTCGTCCAT<br>G             | pEGFP-N1-FLAG                    |
| attb-N-D20-Turbo-BSDr  | CTCATCTCCGGGCCTTTTCGC<br>ATGGCGCCCTGGACGCTG  | TGGGCTTGCCGAGCGGCCG<br>CGTACGCGT                               | C-FLAG-D20                       |
|                        | GCGGCCGCTCGGCAAGCCC<br>ATCCCCAAC             | TGGCAACTAGAAGGCACAGC<br>TTAGTCCAGGGTCAGGCCG                    | V5-Turbo-NES-pCDNA3              |
| attb-N-Turbo-D20-BSDr  | CTCATCTCCGGGCCTTTTCGC<br>ATGGGCAAGCCCATCCCC  | AGGGCGCCATGTCCAGGGT<br>CAGGCGCTC                               | V5-Turbo-NES-pCDNA3              |
|                        | GACCCTGGACATGGCGCCC<br>TGGACGCTG             | TGGCAACTAGAAGGCACAGC<br>TTAAACCTTATCGTCGTCATC<br>CTTGTAATCCAGG | C-FLAG-D20                       |
| pcDNA5 FRT/ZDHHC20     | TAAGCTTGGTACCGAGCTCG<br>CATGGCGCCCTGGACGCT   | CGGGCCCTCTAGACTCGAG<br>CTTTAAACCTTATCGTCGTC<br>TCCTTGTAATCCAGG | TREX-ZDHHC20 WT & ZDHHC20[Y181G] |

Supplementary Table 5. Primer sets used for ZDHHC mutagenesis.

| Mutant | Forward Primer (5' → 3')                                                 | Reverse Primer (5' → 3')                                                  | Templates                                |
|--------|--------------------------------------------------------------------------|---------------------------------------------------------------------------|------------------------------------------|
| C156S  | TCTTAAGATGGATCATCACAGT<br>CCTTGGGTGAATAACTG                              | CAGTTATTCACCCAAGGACTGTGAT<br>GATCCATCTTAAGA                               | C-Flag-D20, C-HA-D20,<br>pLVX-C-Flag-D20 |
| Y181G  | CCTGCTGTTTTTATTGTATTCCC<br>TATTAGGTTGCCTTTTCGTGGC<br>TG                  | CAGCCACGAAAAGGCAACCTAATA<br>GGGAATACAATAAAAACAGCAGG                       | C-Flag-D20, pLVX-C-<br>Flag-D20          |
| Y181A  | CCTGCTGTTTTTATTGTATTCCC<br>TATTAGCTTGCCTTTTCGTGGC<br>TG                  | CAGCCACGAAAAGGCAAGCTAATA<br>GGGAATACAATAAAAACAGCAGG                       | C-Flag-D20                               |
| I22A   | GTGCCGGTGCTCTTCGCCACCT<br>TCGTGGTCGT                                     | ACGACCACGAAGGTGGCGAAGAG<br>CACCGGCAC                                      | C-Flag-D20                               |
| F65A   | GCTTTCATCTGTTCTTTGTTAT<br>GGCTGTATGGTCTATTGGATG<br>ACAAT                 | ATTGTCATCCAATAGGACCATACAG<br>CCATAACAAAGAACAGATGGAAAG<br>C                | C-Flag-D20                               |
| F174A  | GGATTTCTAATTACAAATCTT<br>CCTGCTGGCTTTATTGTATTCC<br>CTATTATATTGCCTTTT     | AAAAGGCAATATAATAGGGAATACA<br>ATAAAGCCAGCAGGAAGAATTTGTA<br>ATTAGAAAATCC    | C-Flag-D20                               |
| F220A  | TTTTCTTTGTGCTGCAATGGC<br>CTTCATCAGCGTCTCTCAC                             | GTGAGAGGACGCTGATGAAGGCCA<br>TTGCAGACAAAAGAAAA                             | C-Flag-D20                               |
| L193G  | GGGCGTCTGCTCGGGGTGCT<br>GGTGGCC                                          | GGCCACCAGCACCCCGAGCAGGA<br>CGCCC                                          | N-Flag-D01                               |
| Y182G  | CTTGGCTTATTCTCTGCTCGGC<br>TGCCTTTTTATTGCGGCA                             | TGCCGCAATAAAAAGGCAGCCGAG<br>CAGAGAATAAGCCAAG                              | N-Flag-D02                               |
| I182G  | TACAATGTACATAGCTCTCGGT<br>TCCTTGACGCGCCTCATC                             | GATGAGGGCGTGCAAGGAACCGA<br>GAGCTATGTACATTGTA                              | N-Flag-D03                               |
| L108G  | CTTCTTCTGCCCTATCTGCTGG<br>GAGGTGTAAACCTGTTTTTTTT                         | AAAAAAAACAGGTTTACACCTCCA<br>GCAGATAGGGCAGAAGAAG                           | N-Flag-D04                               |
| H159G  | CTCCTTCCCTGACAGCCGGCA<br>TTATGGGTGTGTTTGG                                | CCAAACACACCCATAATGCCGGCT<br>GTCAGGGAAAGGAG                                | N-Flag-D05                               |
| I168G  | CATCATGTTGATAAATTGGACT<br>GTCATGGGTCTTTATAATTACTT<br>CAATGCCATGTTT       | AAACATGGCATTGAAGTAATTATAA<br>AGACCCATGACAGTCCAATTTATCA<br>ACATGATG        | N-Flag-D06                               |
| L57G   | CTGTCATGACGTGGCTTGGGGT<br>CGCCTATGCAGA                                   | TCTGCATAGGCGACCCCAAGCCAC<br>GTCATGACAG                                    | N-Flag-D07                               |
| M160G  | CACTCAGTGCACACGGGGTGG<br>GCGTCTGCGG                                      | CCACGACGCCCCACCCCGTGTGCAC<br>TGAGTG                                       | N-Flag-D08                               |
| L194G  | CATCCTTCTCTCCTCCGCGG<br>ACAATCTATGCTTCGCC                                | GGCGAAGACATAGATTGTGCCGAG<br>GGAGAGAGAAAGGATG                              | N-Flag-D09                               |
| M181G  | CAGCACTGTGGCCTCGGCCAC<br>AGCTGGCGGGCTCTGCC                               | CATACAGCAGGATGGCGATCAGGC<br>AGAGCCCGCCAGCTG                               | N-Flag-D11                               |
| M181A  | CGGCCACAGCTGGCGCGCTCT<br>GCCTGATCG                                       | CGATCAGGCAGAGCGCGCCAGCT<br>GTGGCCG                                        | N-Flag-D11                               |
| L153G  | CTACCTGGCGCTGCAGCTGGT<br>GGTGGGTCTGTGGGGCCTGTA<br>C                      | GTACAGGCCCCACAGACCCACCAC<br>CAGCTGCAGCGCCAGGTAG                           | N-Flag-D12                               |
| L478G  | CTATTACATATTCTTCTGTTTT<br>CGGTTCCATGGTATGTGGCTGG<br>ATTATA               | TATAATCCAGCCACATACCATGGAA<br>CCGAAAAACAAGAAGATATGTAAT<br>AG               | N-Flag-D13                               |
| L220G  | AACTACAGATTTTTTATATGTT<br>TATTTTATCTCTGTCTTTGGGA<br>CAGTCTTTATATTTGCATTC | GAATGCAAATATAAAGACTGTCCCA<br>AAAGACAGAGATAAAATAAACATAT<br>AAAAAATCTGTAGTT | N-Flag-D14                               |
| Y184G  | CTTAGCTTACTCTGTTCTCGGC<br>TGCTGTACATTGCTACG                              | CGTAGCAATGTACAGGCAGCCGAG<br>AACAGAGTAAGCTAAG                              | N-Flag-D15                               |
| C159S  | TGTTAAAAATGGATCATCACAG<br>CCCTTGGGTTAATAACTGC                            | GCAGTTATTAACCCAAGGGCTGTG<br>ATGATCCATTTTTAACA                             | N-Flag-D15                               |
| S35C   | CGTCGTGCTCTGGTGTACTAT<br>GCCTACG                                         | CGTAGGCATAGTAGCACCAGAGCA<br>CGACC                                         | N-Flag-D15                               |
| L126G  | TTCTTCTATAGCCACTGGAATG<br>GGATCCTGATTGTCTTCCAC                           | GTGGAAGACAATCAGGATCCCATT<br>CCAGTGGCTATAGAAGAA                            | N-Flag-D16                               |
| M492G  | TATTTTATGGGCTACCTATTCTT<br>CTTGCTTTTTGGGATCTGCTGG<br>ATGATTTA            | TAAATCATCCAGCAGATCCCAAAAA<br>GCAAGAAGAATAGGTAGCCCATAA<br>AATA             | N-Flag-D17                               |
| L247G  | CTTCTTCTACGCGTTTATTCTCT<br>CCCTCTCATTGGGACGGCCTT<br>C                    | GTGACCACACAGGCGAAGATGAAG<br>GCCGTCCCGAATGAGAG                             | N-Flag-D18                               |
| Y167G  | GTCCCTGTGCCTCGGCTCGGG<br>CGCCATG                                         | CATGGCGCCCGAGCCGAGGCACA<br>GGGAC                                          | N-Flag-D19                               |

|            |                                                 |                                              |                                     |
|------------|-------------------------------------------------|----------------------------------------------|-------------------------------------|
| L145G      | CTGCAGTTGTGTTTCTACACTG<br>AACTTGGTACTTGCTACGCAC | CAGAAAGAAAACATCAGTGCCTAG<br>CAAGTACCAAGTTCAG | N-Flag-D21                          |
| L49G       | CGCCCGCCCTGGGCCACGGGG<br>CGC                    | GCGCCCGTGGCCCAGGGCGGGC<br>G                  | N-Flag-D22                          |
| I181G      | TACCTGCGGGTTATTTCTGGGA<br>CTCTTAGCCTTGACACAGA   | TCTGTGCAAGGCTAAGAGTCCCAG<br>AAATAACCCGCAGGTA | N-Flag-D23                          |
| L150G      | GCCGCCGGCGTCTGGGCTCCAC<br>GTCTC                 | GAGACGTGGAGCCCAGCCTGGC<br>GGC                | N-Flag-D24                          |
| TREX Kozak | GTACCGAGCTCGCCGCCACCATGGC<br>GCCCTGGA           | TCCAGGGCGCCATGGTGGCGCGAGCTC<br>GGTAC         | TREX-ZDHHC20 WT &<br>ZDHHC20[Y181G] |

Supplementary Table 6. Primer sets used for ZDHHC substrate mutagenesis

| Mutant                | Forward Primer (5' → 3')                                           | Reverse Primer (5' → 3')                                           | Templates                 |
|-----------------------|--------------------------------------------------------------------|--------------------------------------------------------------------|---------------------------|
| C71A                  | GCTATGAAGCCAGGCAGGCG<br>AAGTTCATGAAGAGTGT                          | ACACTTTCATGAACTTCGCCTGCC<br>TGGGCTTCATAGC                          | N-HA-lfitm3               |
| C72A                  | TAGGCTATGAAGCCAGGGCG<br>CAGAAGTTCATGAAGAG                          | CTTTCATGAACTTCTGCGCCCTG<br>GGCTTCATAGCCTA                          | N-HA-lfitm3               |
| C105A                 | GGTGCTGATGTTTCAGGGCCTTA<br>GCAGTGGAGGCG                            | CGCCTCCACTGCTAAGGCCCTGAA<br>CATCAGCACC                             | N-HA-lfitm3               |
| C71/72A               | GGCATAGGCTATGAAGCCAG<br>GGCGGCGAAGTTCATGAAGAG<br>TGTATTG           | CAATACACTTTCATGAACTTCGCC<br>GCCCTGGGCTTCATAGCCTATGCC               | N-HA-lfitm3               |
| C71/72/105A           | GGCATAGGCTATGAAGCCAG<br>GGCGGCGAAGTTCATGAAGAG<br>TGTATTG           | CAATACACTTTCATGAACTTCGCC<br>GCCCTGGGCTTCATAGCCTATGCC               | N-HA-lfitm3 C105A         |
| C174/175A             | GGCCAAAGCAGCAAGGAGCGG<br>CCAGCTTCTGCAGCCACT                        | AGTGGCTGCAGAAGCTGGCCGCTC<br>CTTGCTGCTTTGGCC                        | N-HA-PI4K2A               |
| C177/178A             | GGCAGTCACGGCCAAAGGCGG<br>CAGGACAGCACAGCTTCT                        | AGAAGCTGTGCTGTCTGCGCCT<br>TTGGCCGTGACTGCC                          | N-HA-PI4K2A               |
| C174/175/177/<br>178A | GACAAGGCAGTCACGGCCAAA<br>GGCGGCAGGAGCGGCCAGCTT<br>CTGCAGCCACTTGGTC | GACCAAGTGGCTGCAGAAGCTGGC<br>CGCTCCTGCCCTTTGGCCGTGA<br>CTGCCTTGTGTC | N-HA-PI4K2A               |
| C23A                  | GTCTTTGTTGTGTTGCTTCTCG<br>CCATTCCCTTCATTCTCCTAA                    | TTAGGAGAAATGAAGGGAATGGCG<br>AGAAGCAACACAACAAGAC                    | pcDNA3.1(+)-HA-<br>BCAP31 |

Supplementary Table S7. MS parameters were optimized by direct infusion of 16  $\mu$ M acyl-CoAs dissolved in 10 mM MeOH/ammonium acetate at 5  $\mu$ L/min into an TSQ Quantiva triple quadrupole MS (Thermo Scientific). A selected reaction monitoring (SRM) function was applied for the simultaneous detection of acyl-CoA and probe-CoA molecules with RF lens and collision energies as shown in the table below.

| Compound                                  | Start Time (min) | End Time (min) | Polarity | Precursor (m/z) | Product (m/z) | Collision Energy (V) | RF Lens (V) |
|-------------------------------------------|------------------|----------------|----------|-----------------|---------------|----------------------|-------------|
| <sup>13</sup> C <sub>3</sub> -Malonyl-CoA | 0                | 20             | Positive | 857.06          | 305.169       | 37.15                | 118.36      |
| <sup>13</sup> C <sub>3</sub> -Malonyl-CoA | 0                | 20             | Positive | 857.06          | 350.169       | 27.8                 | 118.36      |
| <sup>13</sup> C <sub>3</sub> -Malonyl-CoA | 0                | 20             | Positive | 857.06          | 410.071       | 24.11                | 118.36      |
| <sup>13</sup> C <sub>3</sub> -Malonyl-CoA | 0                | 20             | Positive | 857.06          | 428.04        | 27.04                | 118.36      |
| <sup>13</sup> C <sub>3</sub> -Malonyl-CoA | 0                | 20             | Positive | 857.06          | 448.151       | 22.19                | 118.36      |
| YnP-CoA                                   | 0                | 20             | Positive | 1002.32         | 410.111       | 30                   | 130         |
| YnP-CoA                                   | 0                | 20             | Positive | 1002.32         | 428.11        | 30                   | 130         |
| YnP-CoA                                   | 0                | 20             | Positive | 1002.32         | 495.36        | 30                   | 130         |

|           |   |    |          |         |         |       |     |
|-----------|---|----|----------|---------|---------|-------|-----|
| YnP-CoA   | 0 | 20 | Positive | 1002.32 | 593.37  | 30    | 130 |
| C16:0-CoA | 0 | 20 | Positive | 1006.33 | 397.333 | 30.98 | 144 |
| C16:0-CoA | 0 | 20 | Positive | 1006.33 | 410.111 | 26.48 | 144 |
| C16:0-CoA | 0 | 20 | Positive | 1006.33 | 428.111 | 29.97 | 144 |
| C16:0-CoA | 0 | 20 | Positive | 1006.33 | 499.444 | 33.46 | 144 |
| 18-Bz-CoA | 0 | 20 | Positive | 1135.4  | 410.111 | 30    | 130 |
| 18-Bz-CoA | 0 | 20 | Positive | 1135.4  | 428.111 | 30    | 130 |
| 18-Bz-CoA | 0 | 20 | Positive | 1135.4  | 628.41  | 30    | 130 |
| 18-Bz-CoA | 0 | 20 | Positive | 1135.4  | 726.43  | 30    | 130 |

Supplementary Table 8. Guide RNAs for generation of ZDHHC20 knock-out cell lines

| Guide RNA | Forward Oligo (5' → 3')       | Reverse Oligo (5' → 3')       | Exon Targeted |
|-----------|-------------------------------|-------------------------------|---------------|
| gRNA1     | CACCGCGCGCACCCACGTTTT<br>ATA  | AAACTATGAAAACGTGGGTGCGCG<br>C | 9             |
| gRNA2     | CACCGGAAGCTGATGTGGTATA<br>GAT | AAACATCTATACCACATCAGCTTCC     | 4             |

Supplementary Table 9. Comparison of -Log Student's t-test values in significantly enriched substrates in the inducible Flp-In™ T-REx™ ZDHHC20[Y181G] system and observed in the overexpressed ZHHC20[Y181G] system.

| Gene Names         | Flp-In™ T-REx™ ZDHHC20[Y181G] | Overexpressed ZHHC20[Y181G in HEK293T] |
|--------------------|-------------------------------|----------------------------------------|
| NCAM1              | 3.99684                       | 0.236981386                            |
| CD81               | 2.35145                       | 1.624676404                            |
| SCARB1             | 2.06502                       | 2.728360518                            |
| LMAN2              | 3.12472                       | 2.276817726                            |
| GPX8               | 1.65215                       | 5.035153985                            |
| SLC3A2             | 2.7649                        | 2.196013052                            |
| BET1;DKFZp781C0425 | 2.57035                       | 2.667884292                            |
| PTRH2              | 2.72686                       | 4.359553832                            |
| SCAMP3             | 2.0937                        | 3.237179303                            |
| SCAMP1             | 3.31211                       | 3.52992149                             |
| STX7               | 3.31363                       | 6.099594143                            |
| CYB5B              | 3.8324                        | 2.221461403                            |
| CPD                | 4.25644                       | 1.161774621                            |
| TFRC               | 3.83118                       | 2.757314377                            |
| IGF2R              | 2.75487                       | 2.633142222                            |
| CANX               | 4.15653                       | 0.658001813                            |
| VAMP7              | 2.04805                       | 0.849621078                            |



|         |         |             |
|---------|---------|-------------|
| CKAP4   | 4.12575 | 5.967218567 |
| MLEC    | 4.52191 | 0.072233846 |
| SLC1A5  | 3.31353 | 4.645900762 |
| VAMP3   | 3.29348 | 1.821914871 |
| MTDH    | 4.01342 | 2.289114481 |
| LSR     | 2.99476 | 1.185664251 |
| TSPAN14 | 1.99335 | 4.011930624 |
| SLC35B2 | 1.76436 | 4.44602433  |
| NCSTN   | 2.90123 | 0.518187726 |
| GLG1    | 1.82921 | 0.296333714 |
| TMX3    | 4.15625 | 0.007419209 |
| SLC38A2 | 1.74294 | 2.659194662 |
| SORT1   | 3.46093 | 0.401372241 |
| TMX4    | 2.48304 | 1.186091139 |
| TMX1    | 2.3788  | 2.953057551 |
| DNAJC5  | 3.06901 | 1.162369768 |
| PTGFRN  | 4.03202 | 0.466283984 |
| TMX2    | 2.19996 | 3.190539947 |
| SLC30A1 | 3.30438 | 1.216217635 |

# Supplementary Figures

A

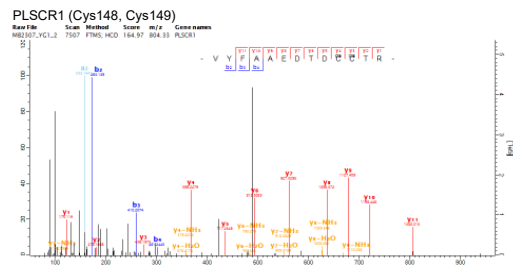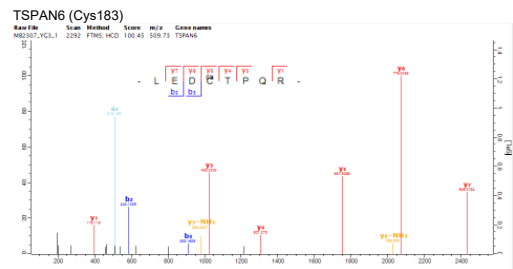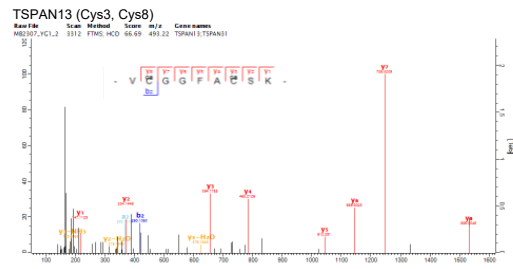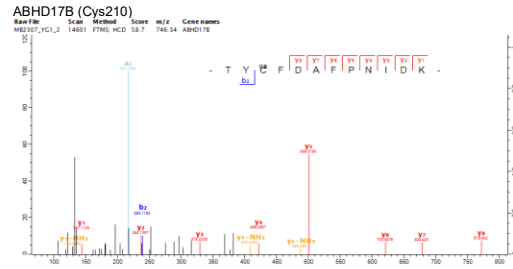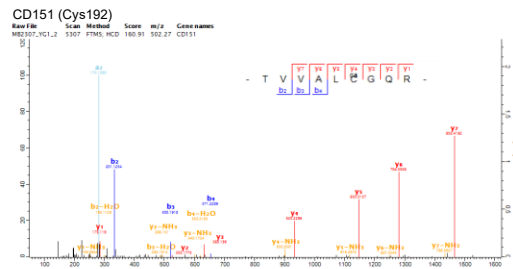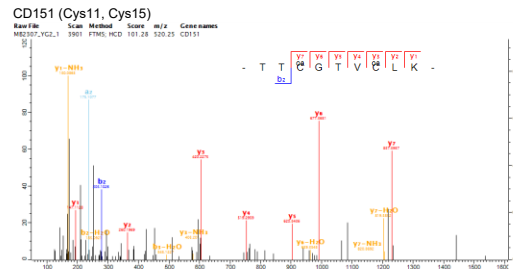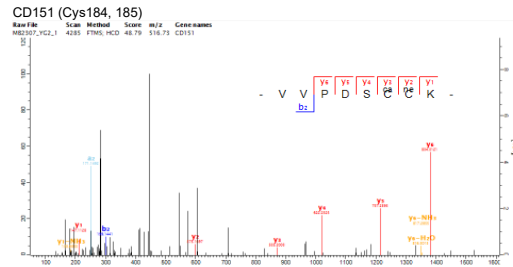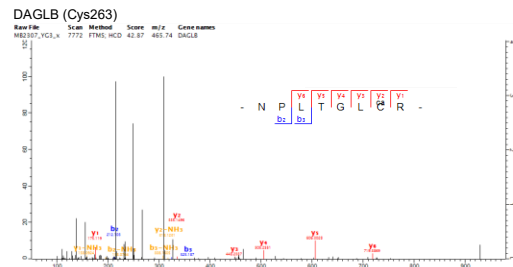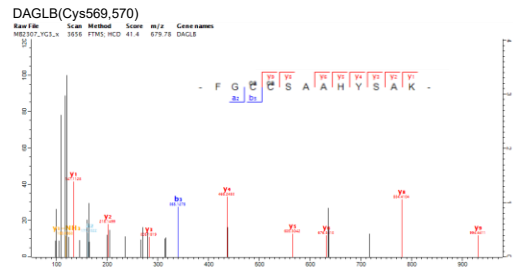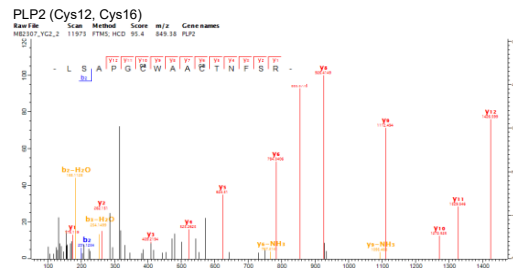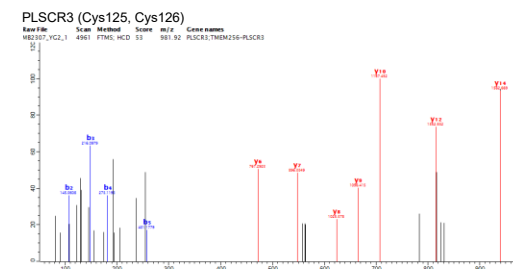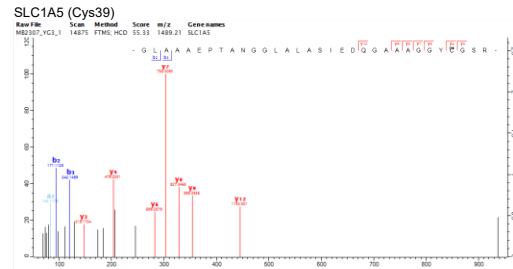

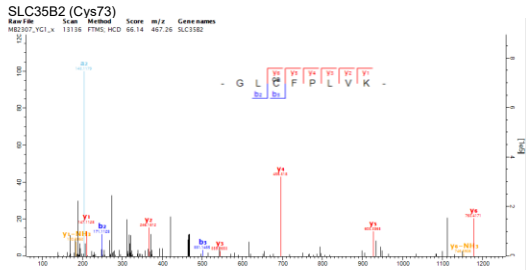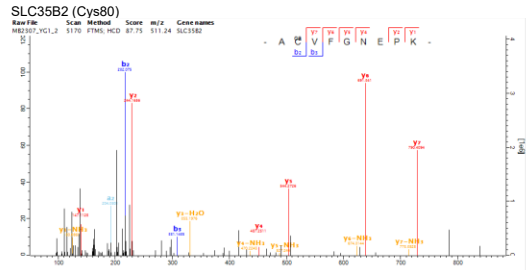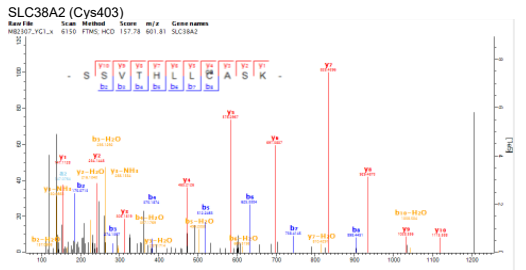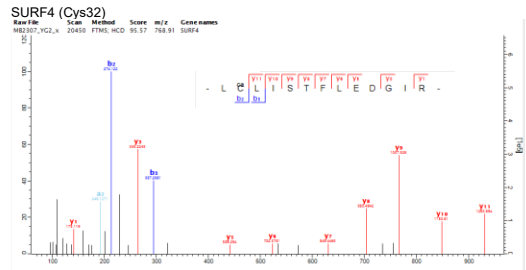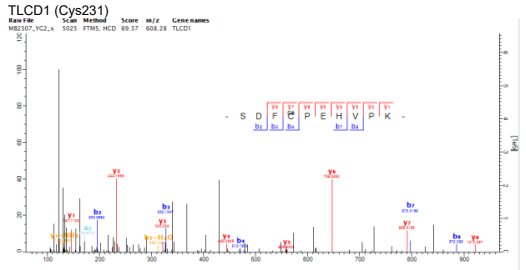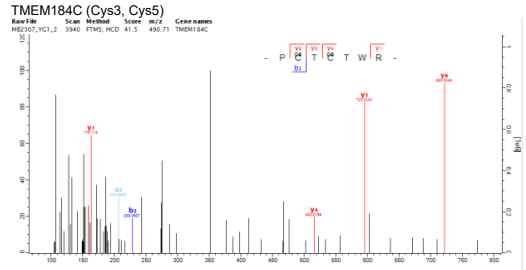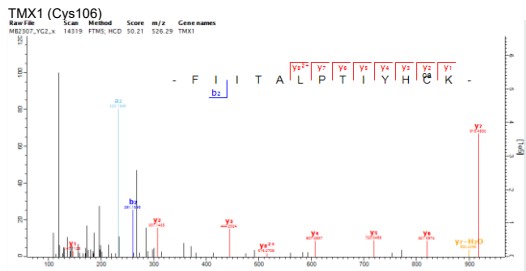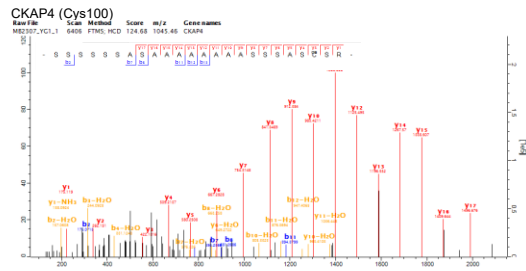

**B**

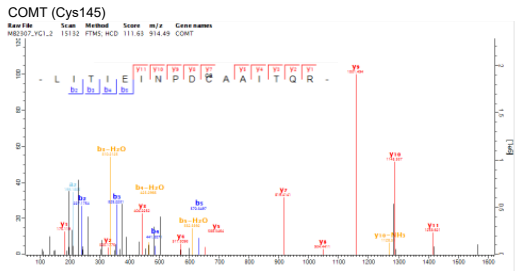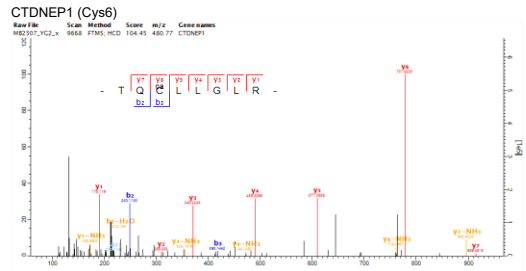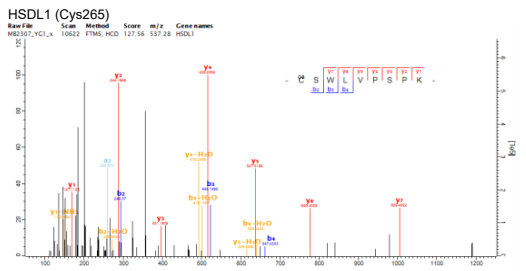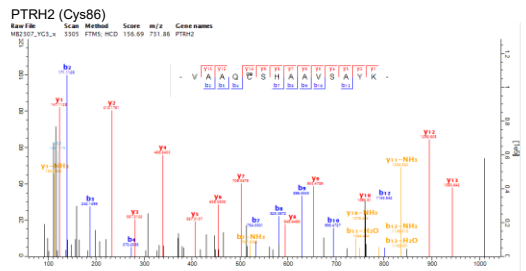

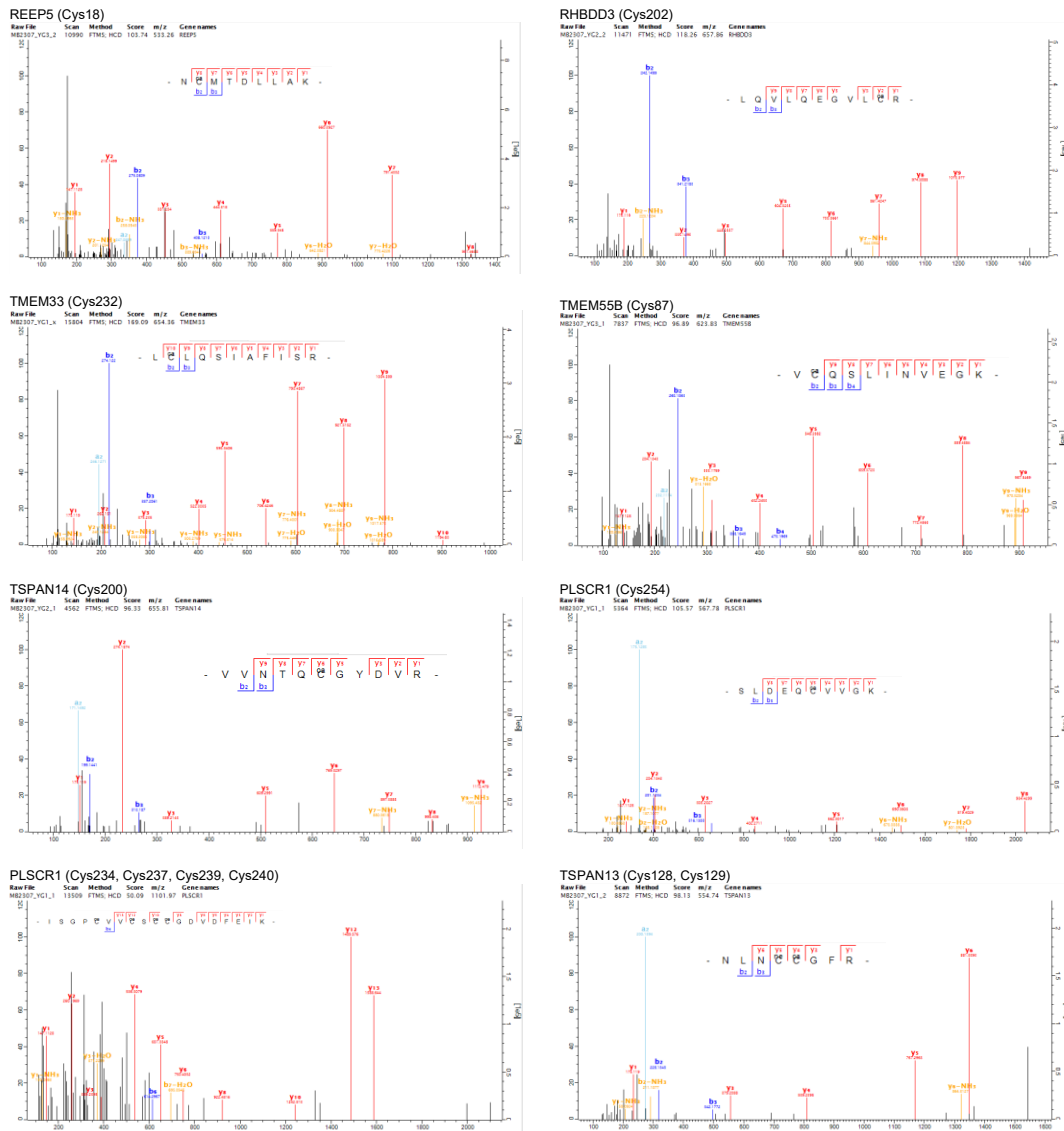

**Supplementary Figure 1. MS/MS spectra of putative previously and newly identified ZDHHC20 mediated S-acylation sites in HEK293T cells.** MS/MS spectra of sites identified to be carbamidomethylated during on-bead hydrolysis workflow of HEK293T cells. All the sites identified were from proteins enriched within the ZDHHC20[Y181G] expressing cells when treated with 18-Bz and therefore are indicative of a ZDHHC20 S-acylation site. Sites were curated as being detected within the mutant expressing samples and spectra inspected by eye. **(A)** These sites correspond to those either identified as being S-acylated in palmitoyl-proteome experiments or validated as sites of S-acylation<sup>6</sup>. **(B)** The sites identified correspond to those not previously identified through other studies which could correspond to novel sites of S-acylation.

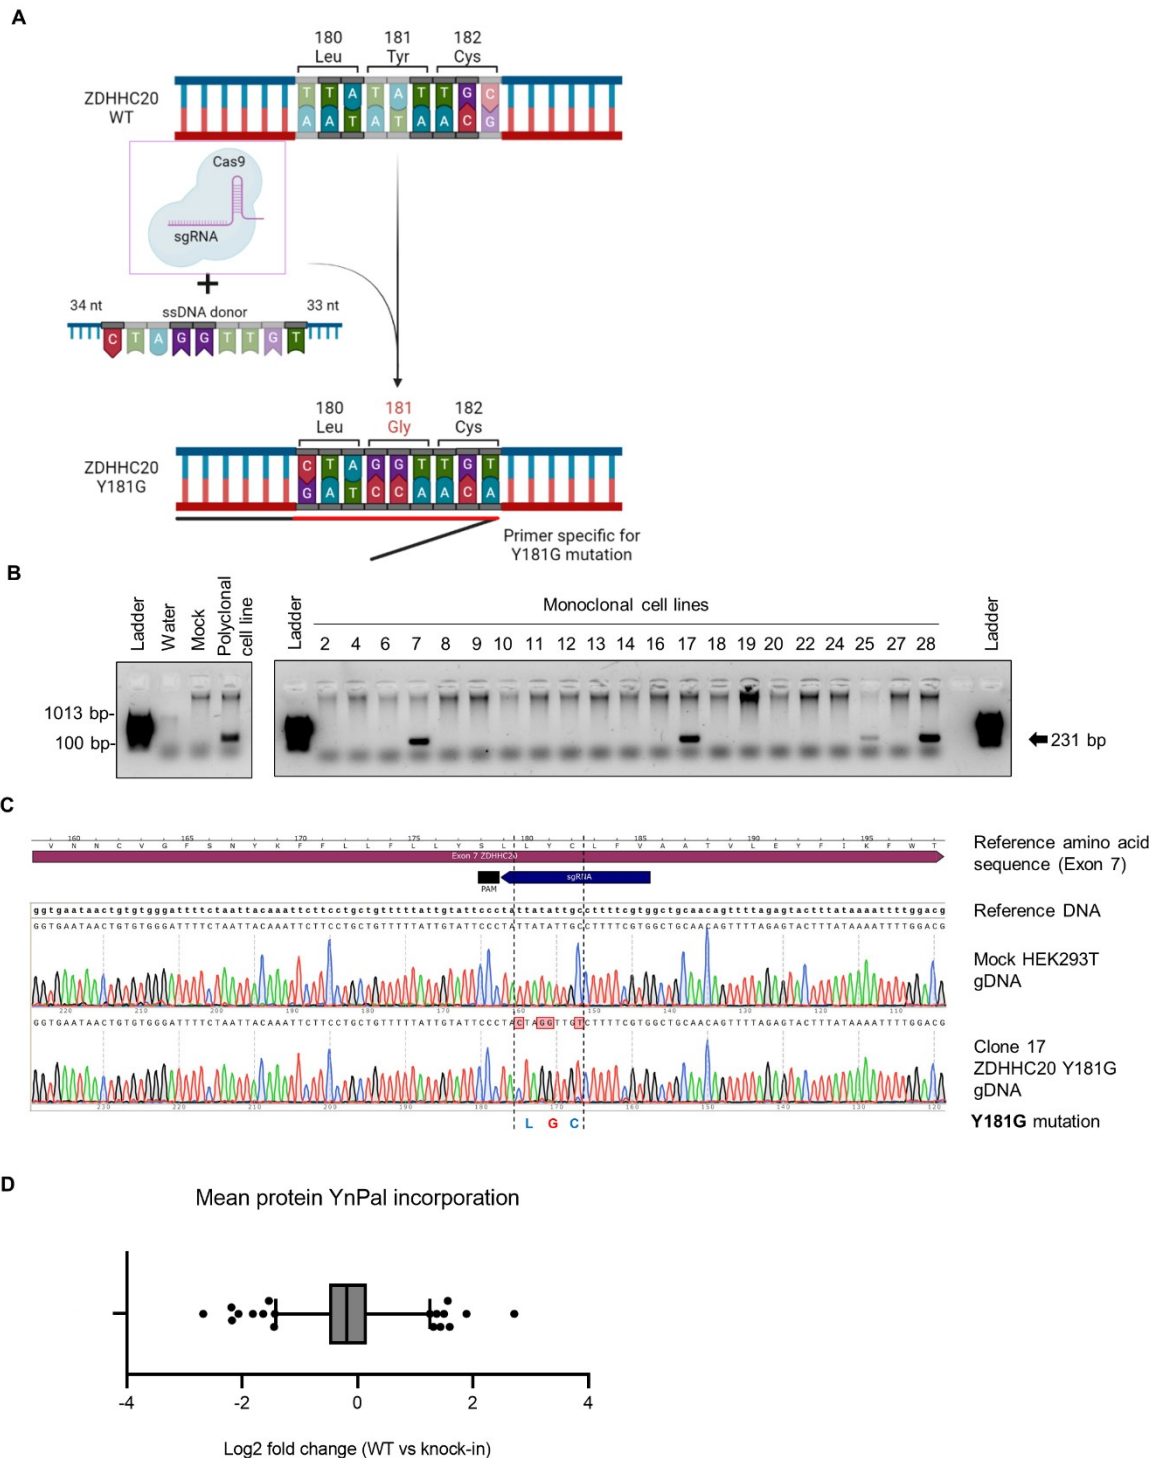

**Supplementary Figure 2. Knock-in ZDHHC20Y181G mutant design and validation in HEK293T cell line.** (A) Knock-in design strategy to generate ZDHHC20Y181G mutant via homologous double strand recombination using single strand DNA as template (B) Validation of *Left*: PCR controls in 2% agarose gels to probe for Y181G genomic integration using water, mock (negative) and parental polyclonal cell line (positive). *Right*: As in left panel, but showing PCR products in mono clonal cell lines (1 biological replicate). (C) Alignment of Sanger sequencing traces of mock and positive homozygous clone 17 with wild type sequence of Exon 7 in ZDHHC20. In maroon, coding sequence of exon 7 of ZDHHC20. In blue, target sequence and direction of sgRNA used in this study. (D) Box and whisker plots represent median values (center lines) and 25th and 75th percentiles (box limits) with Tukey whiskers

graph showing LC-MSMS (nanoElute2 and timstofHT) data of mean incorporation log<sub>2</sub> fold-change between knock-in ZDHHC[20Y181G] vs ZDHHC20 WT treated with YnPal (n= 4 independent biological replicates).

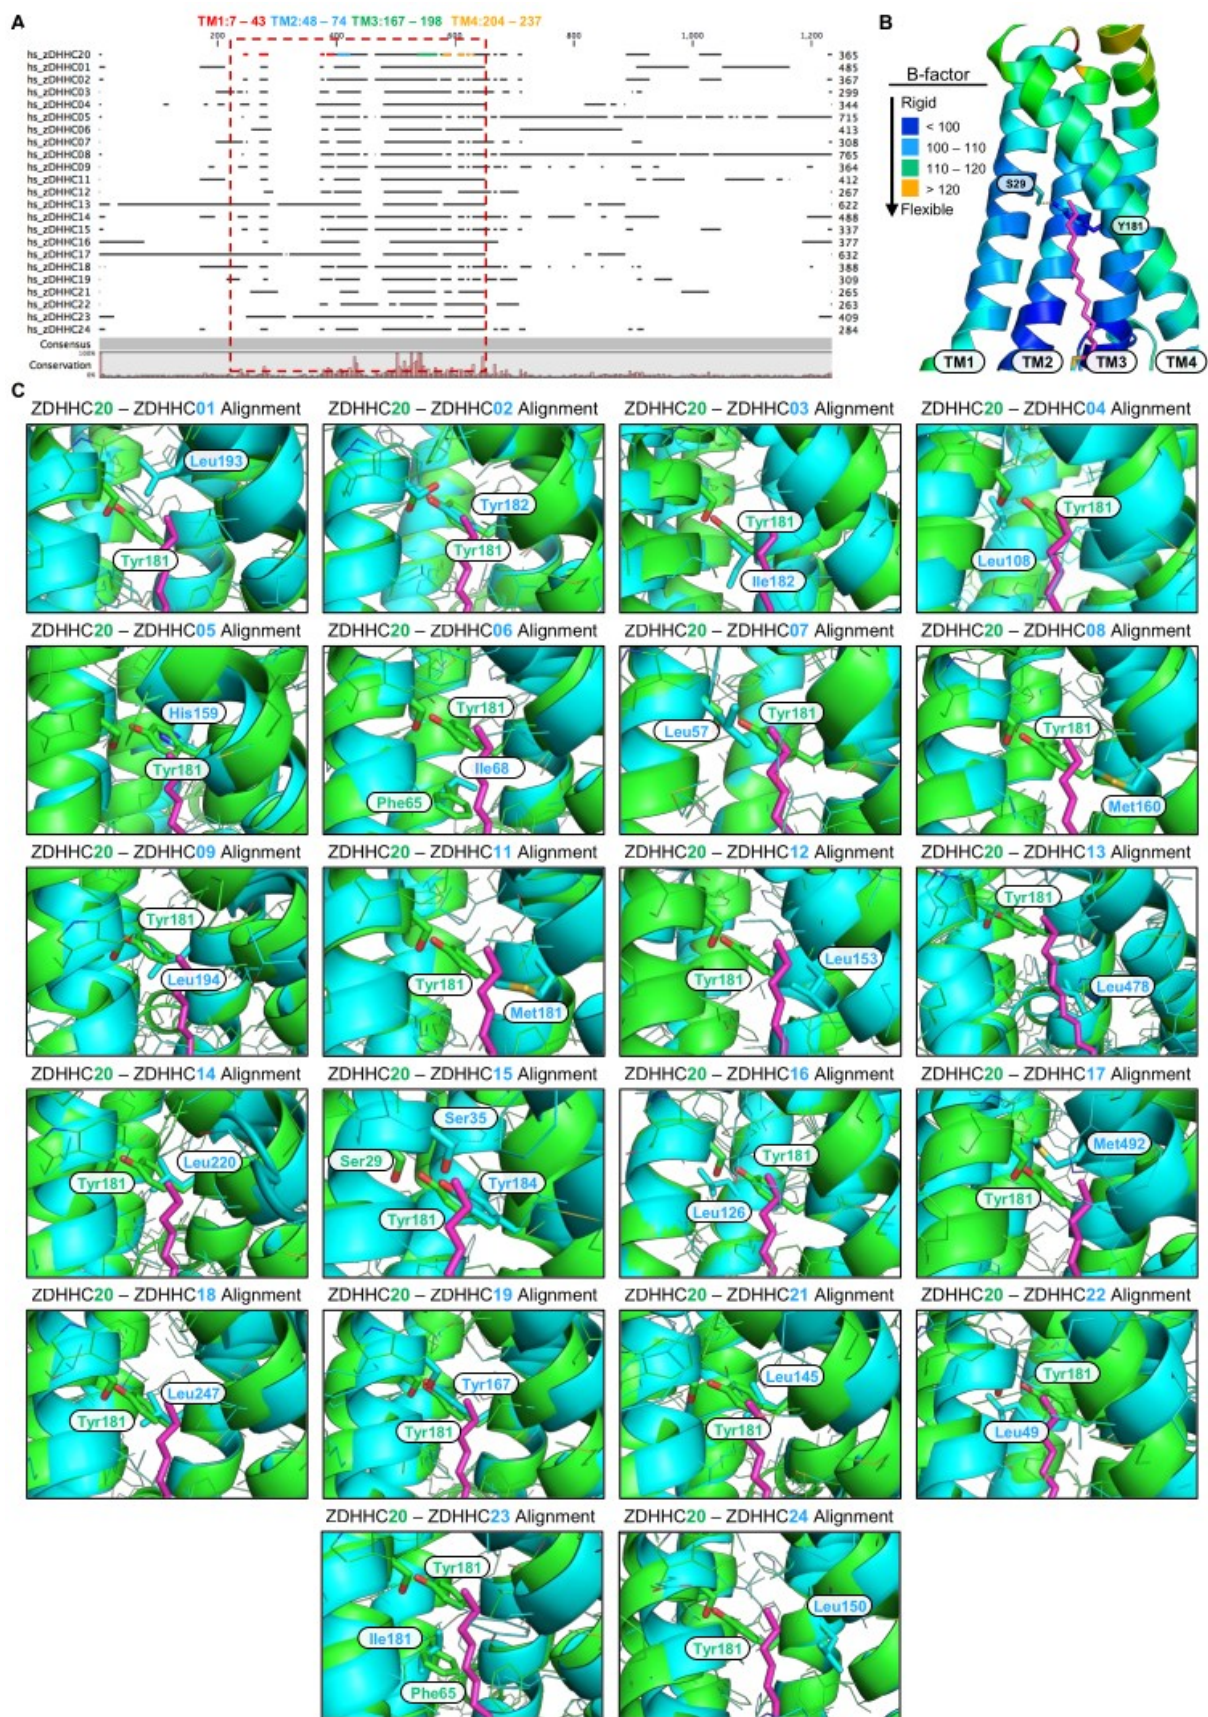

**Supplementary Figure 3. Expansion of ZDHC chemical genetics.** (A) Multiple protein sequence alignments of all ZDHC family members. The transmembrane helices (TMs) 1 - 4

of ZDHHC20 are indicated in red, cyan, blue and green, respectively. The ZDHHC protein sequences overlapping with ZDHHC20 TMs 1 - 4 are within the dotted, dark red border. **(B)** The transmembrane domain of ZDHHC20 (PDB entry 6BML). The B-factor coloring scheme ( $*/ca$ ) was applied to secondary structures. Note that Ser29 and Tyr181 pinch helices TM1 and TM3 together through hydrogen-bonding. **(C)** ZDHHC homology models (blue) were generated using Phyre2 and structurally aligned to ZDHHC20 (green). Residue labels for ZDHHC20 Ser29, Tyr181 and Phe65 (green) and all others (ZDHHCs 1-19 and 21-24, blue) are positioned adjacent to their respective residues. Blue labels highlight residues that serve as putative sites for mutagenesis and bump-hole engineering.

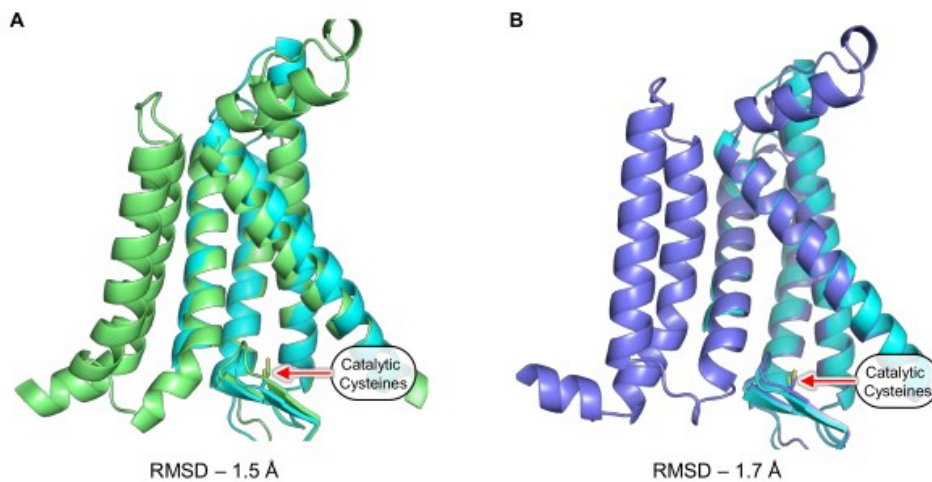

**Supplementary Figure 4. Structural alignments of full and core ZDHHC13 and 17 homology models.** **(A-B)** Homology models of complete ZDHHC13 **(A)** and ZDHHC17 **(B)** were downloaded from the AlphaFold Protein Structure Database or generated by PHYRE2 using sequences of the four-TM helical core. Each set of models were aligned using Pymol and agreement reported as the root-mean-square deviation between protein backbones.



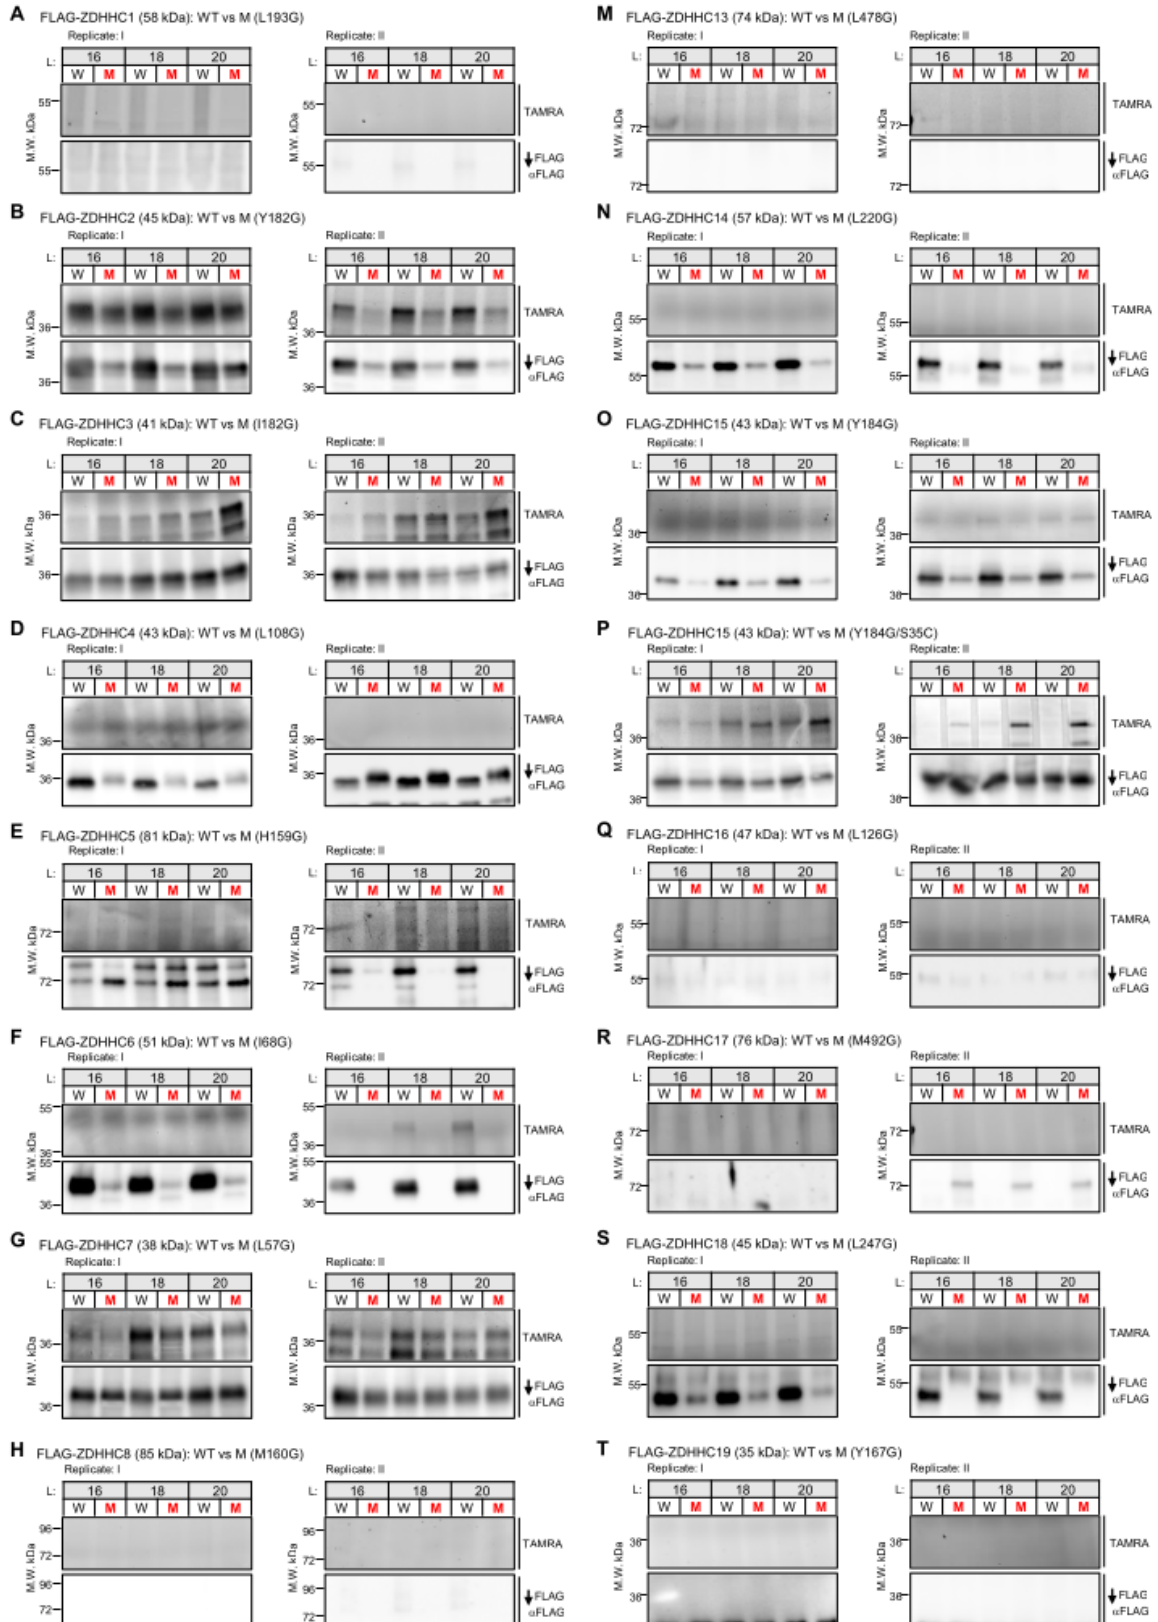

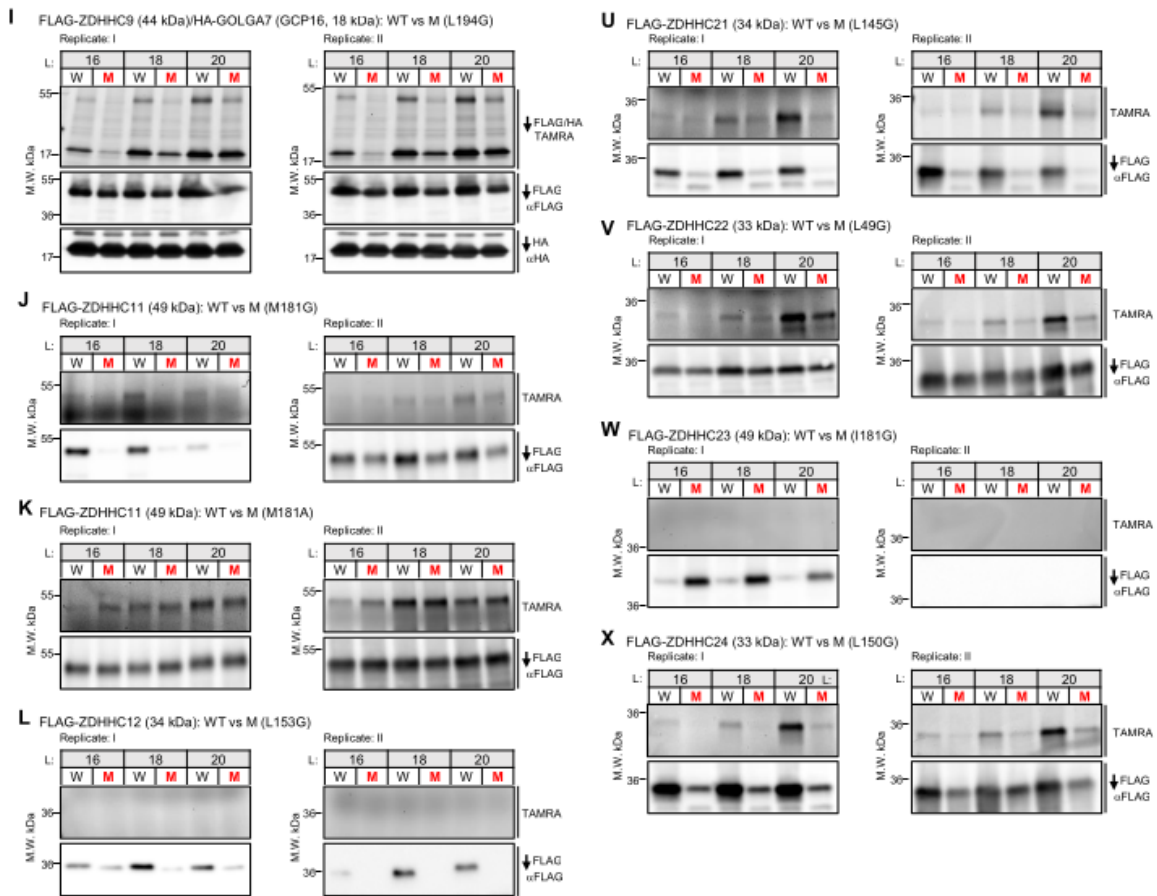

**Supplementary Figure 5. Chain length optimization against putative chemical genetics enabling ZDHHC mutants.** (A-X) The indicated single or double mutants of FLAG-tagged ZDHHC family members were generated and subjected to loading assays with probes containing chain-lengths of 16, 18 and 20 Acetyl bump (denoted 16, 18, and 20). Note that for ZDHHC9 (I) loading assays, cells were co-transfected with ZDHHC9 and HA-tagged GOLGA7 (GCP16). Wild-type (WT or W in tables) and mutant (M) constructs were transiently transfected into HEK293T cells and treated with 15  $\mu$ M probe for 4 h. After cell lysis, constructs were immunoprecipitated on anti-FLAG resin, clicked with TAMRA-azide and separated by SDS-PAGE. Assays were conducted in duplicate and loading and input were visualized by in-gel fluorescence and anti-FLAG or -HA immunoblot, respectively (n=2 independent biological replicates).

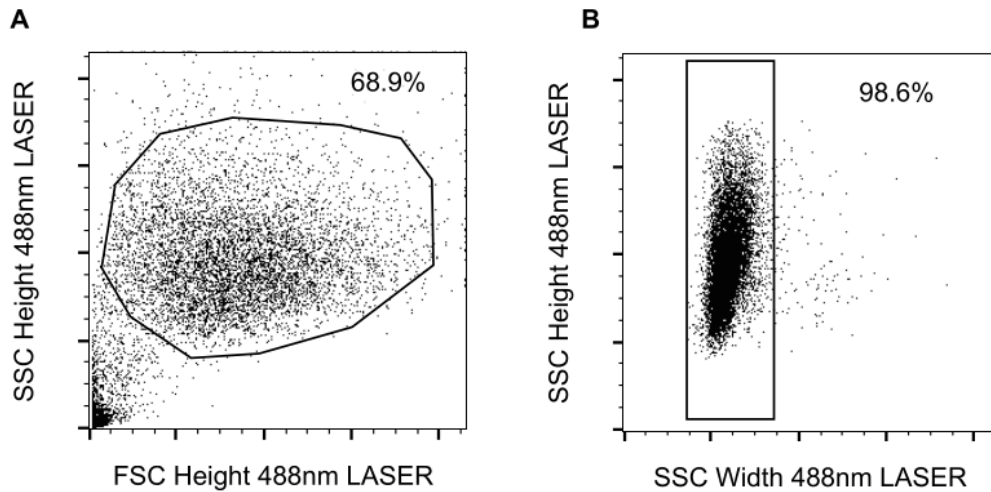

**Supplementary Figure 6. Gating strategy for single cell sorting. (A-B)** Example of data analyzed in FlowJo. **(A)** Cells were separated from the debris using side scatter (SSC) height vs. forward scatter (FSC) height. **(B)** Single cells were then identified using SSC height vs. SSC width. Single cells were sorted into 96-well plates on the Beckman Coulter MoFlo XDP using the Single Cell sort mask with a drop envelope of 0.5.

## **Supplementary Information – References**

- 6159 Yang, X., Ma, Y., Li, N., Cai, H. & Bartlett, M. G. Development of a Method for the Determination of Acyl-CoA Compounds by Liquid Chromatography Mass Spectrometry to Probe the Metabolism of Fatty Acids. *Anal Chem* **89**, 813-821, doi:10.1021/acs.analchem.6b03623 (2017).
- 60 Matyash, V., Liebisch, G., Kurzchalia, T. V., Shevchenko, A. & Schwudke, D. Lipid extraction by methyl-tert-butyl ether for high-throughput lipidomics. *J Lipid Res* **49**, 1137-1146, doi:10.1194/jlr.D700041-JLR200 (2008).
- 61 Cajka, T. & Fiehn, O. Increasing lipidomic coverage by selecting optimal mobile-phase modifiers in LC-MS of blood plasma. *Metabolomics* **12**, doi:10.1007/s11306-015-0929-x (2016).
- 62 Tsugawa, H. *et al.* MS-DIAL: data-independent MS/MS deconvolution for comprehensive metabolome analysis. *Nat Methods* **12**, 523-526, doi:10.1038/nmeth.3393 (2015).
- 63 Koelmel, J. P. *et al.* LipidMatch: an automated workflow for rule-based lipid identification using untargeted high-resolution tandem mass spectrometry data. *BMC Bioinformatics* **18**, 331, doi:10.1186/s12859-017-1744-3 (2017).
- 64 Kessner, D., Chambers, M., Burke, R., Agus, D. & Mallick, P. ProteoWizard: open source software for rapid proteomics tools development. *Bioinformatics* **24**, 2534-2536, doi:10.1093/bioinformatics/btn323 (2008).

## Uncropped Scans of Supplementary Information blots

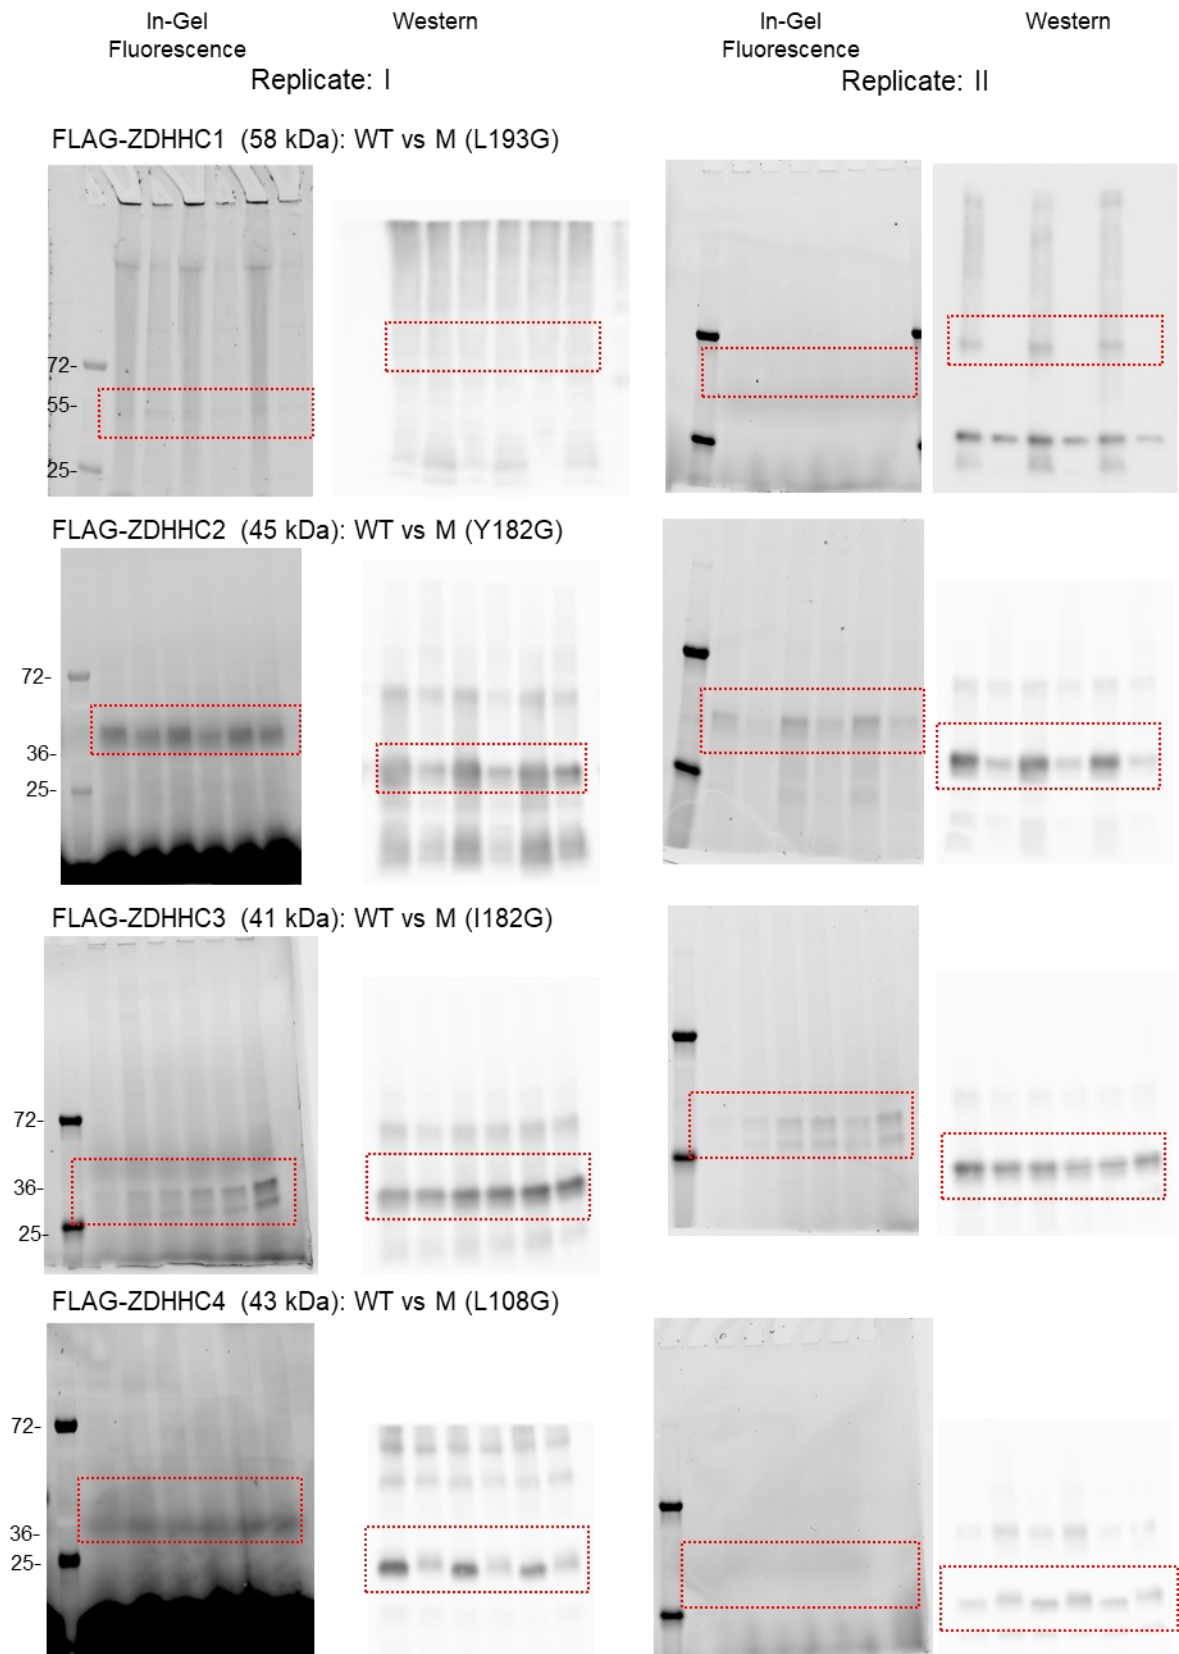

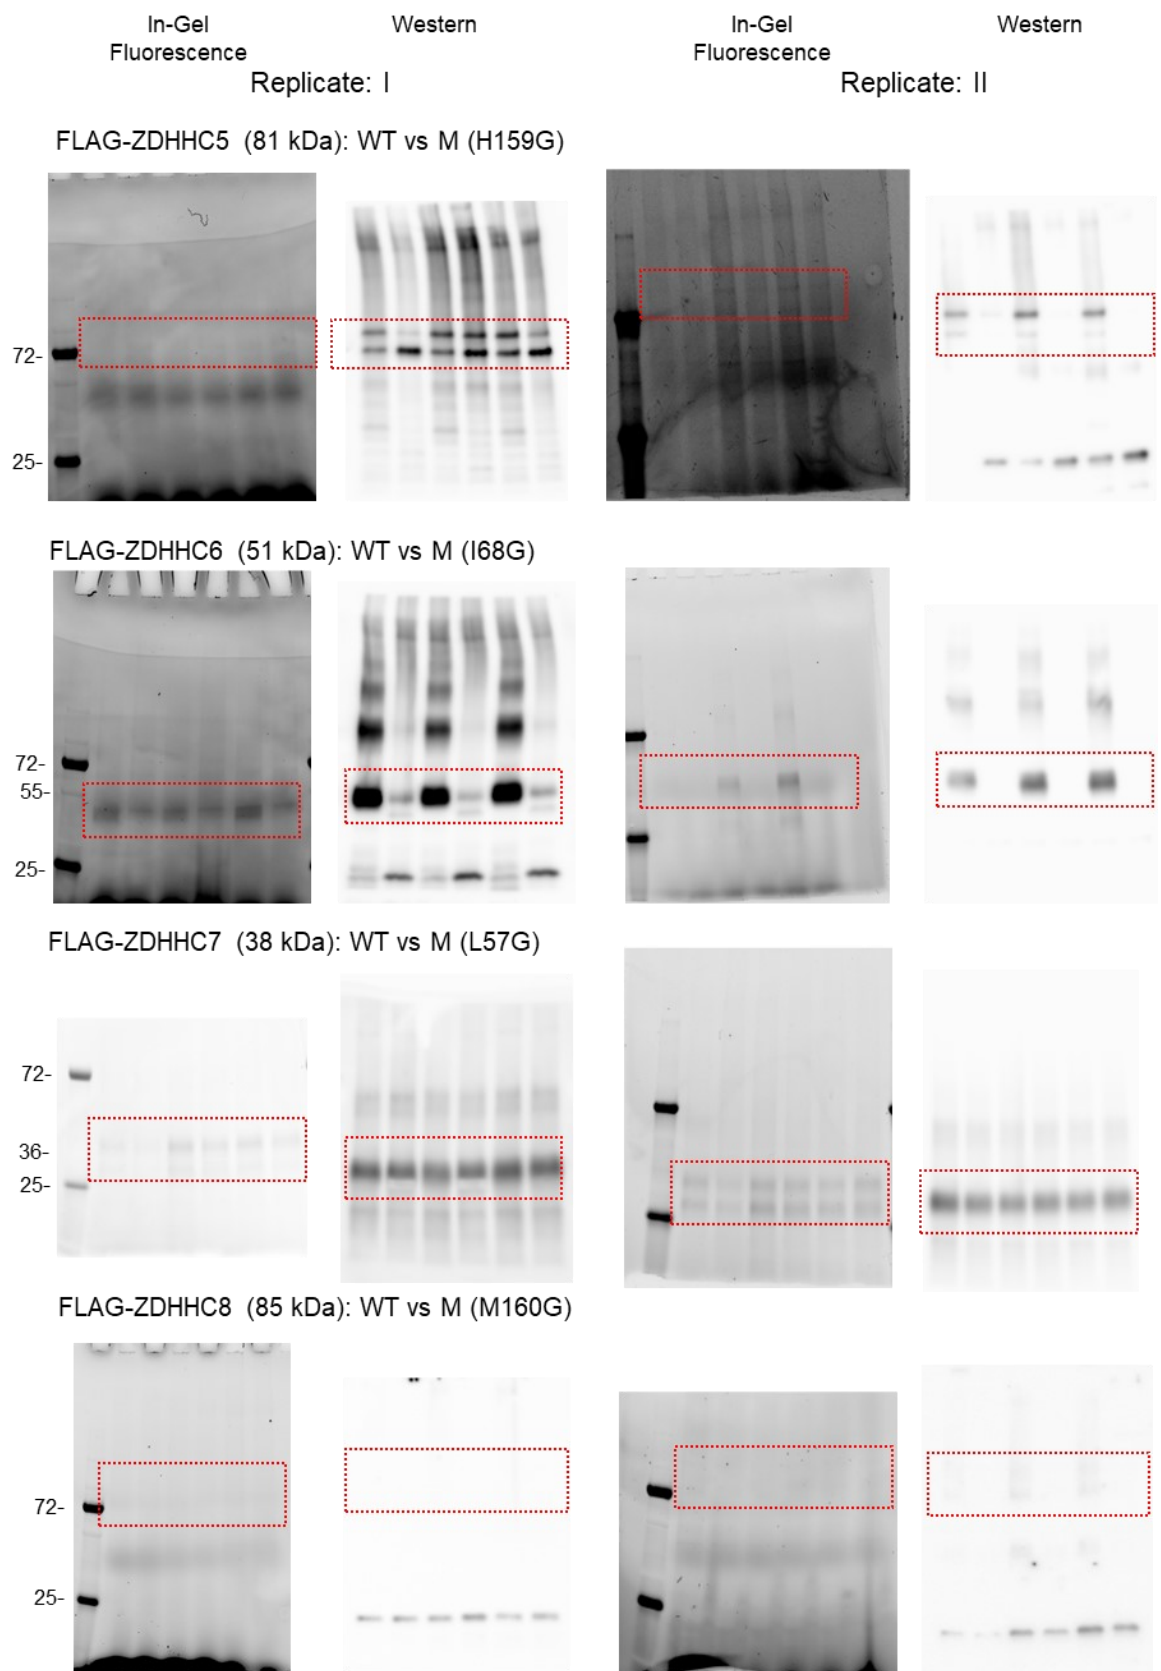

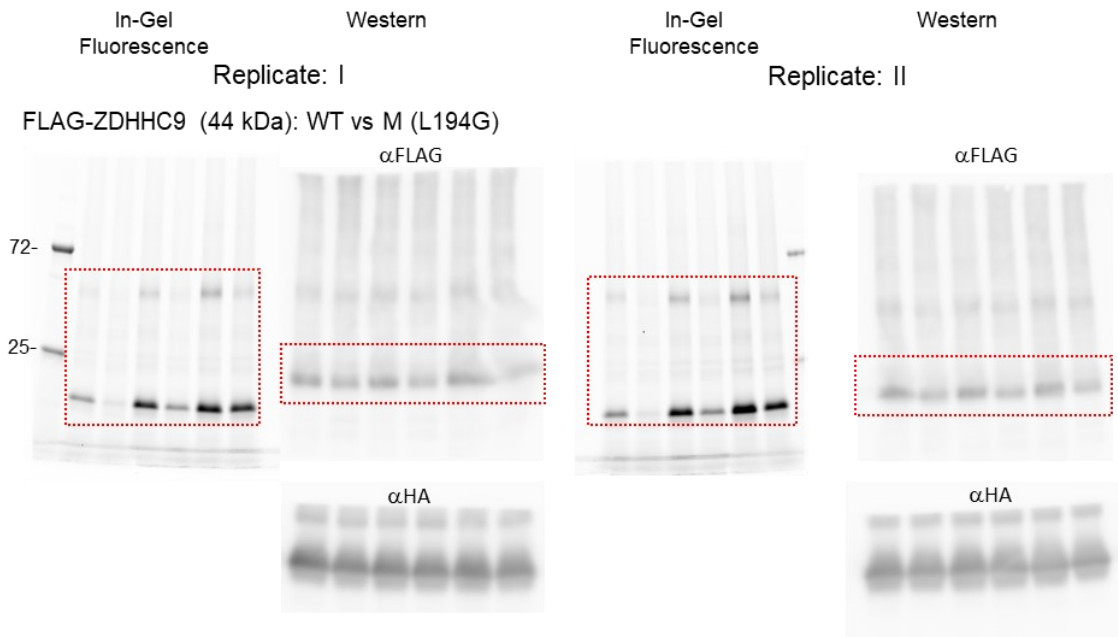

**FLAG-ZDHHC11 (49 kDa): WT vs M (M181G)**

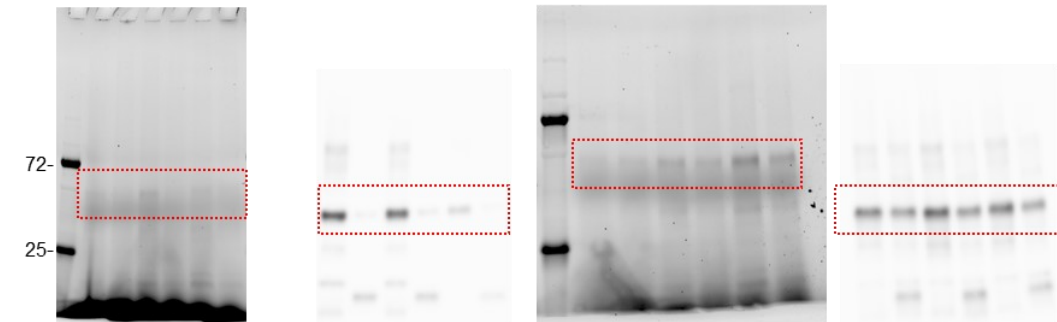

**FLAG-ZDHHC11 (49 kDa): WT vs M (M181A)**

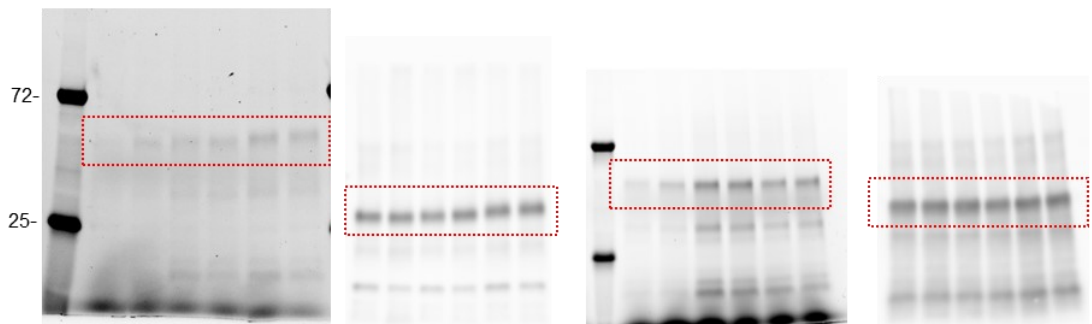

**FLAG-ZDHHC12 (34 kDa): WT vs M (L153G)**

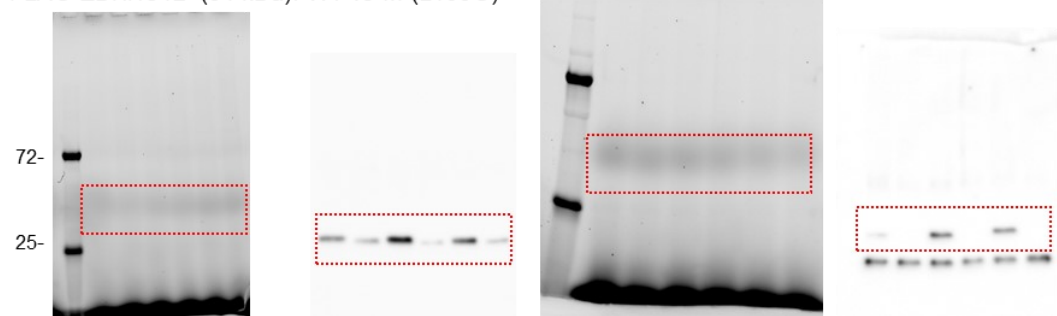

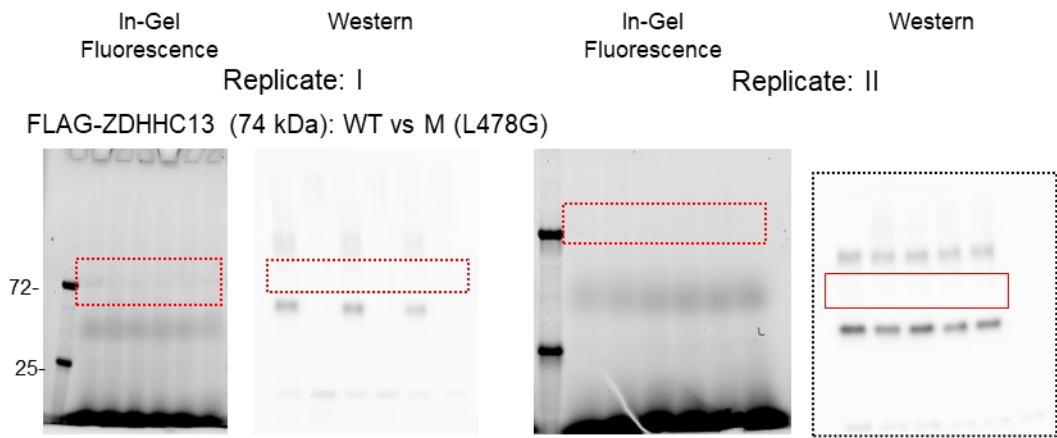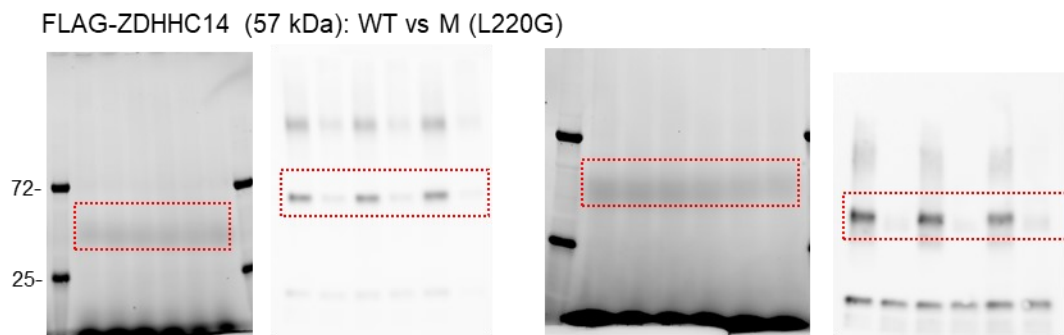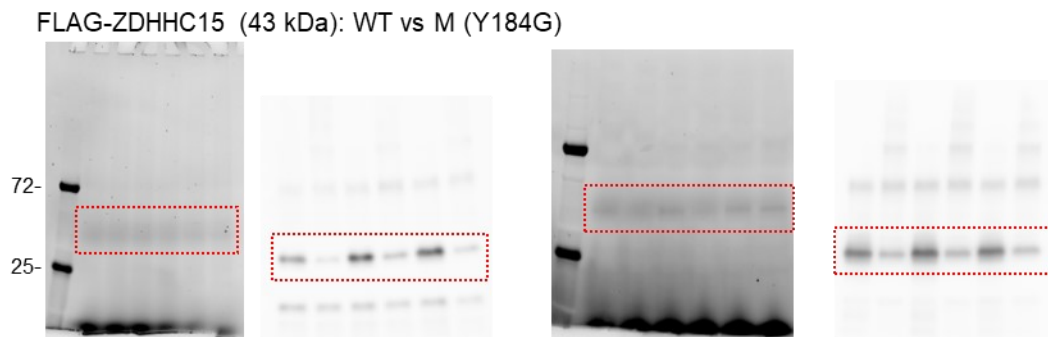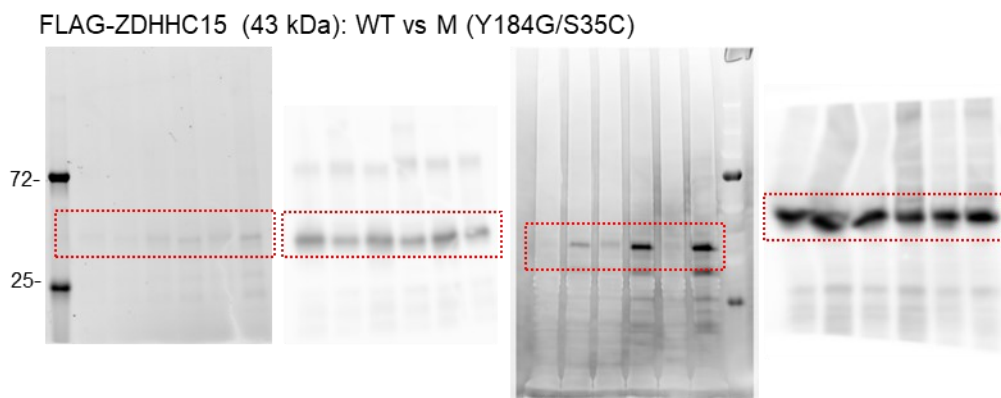



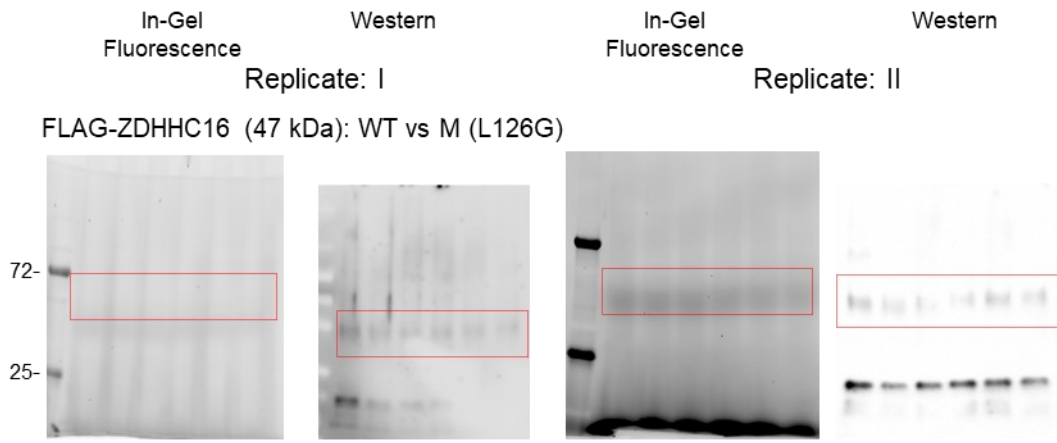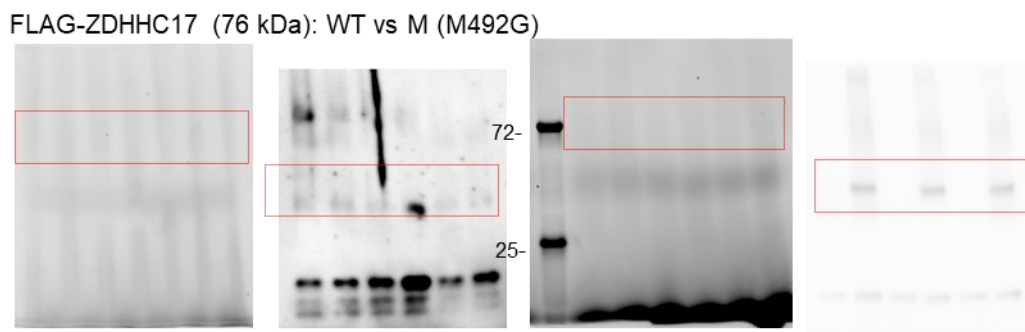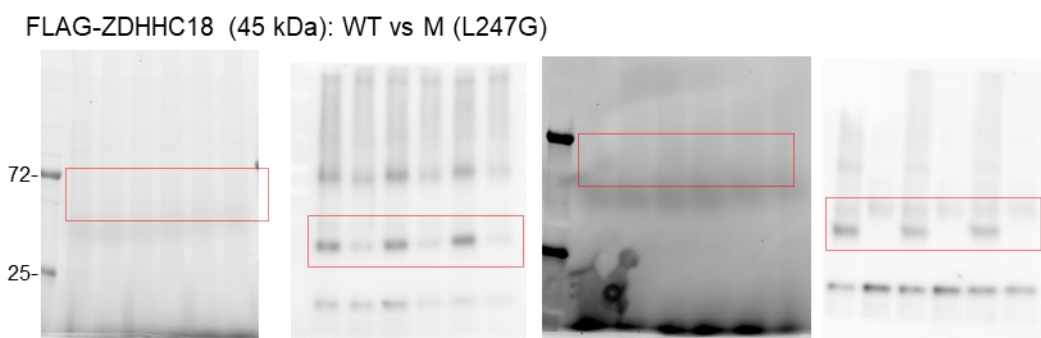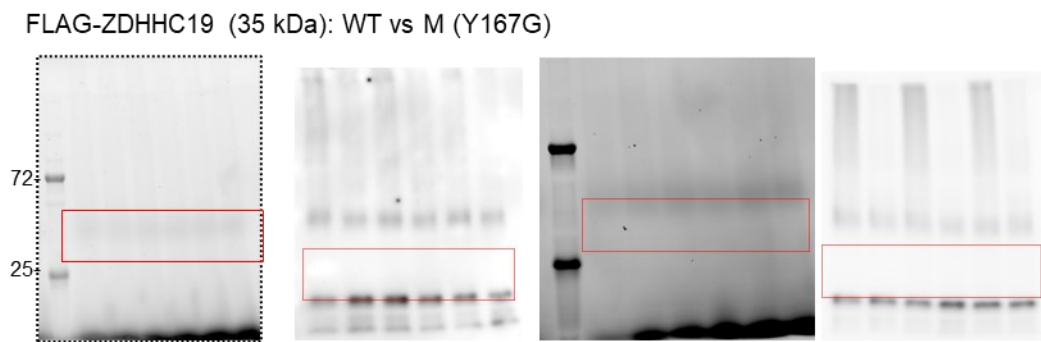

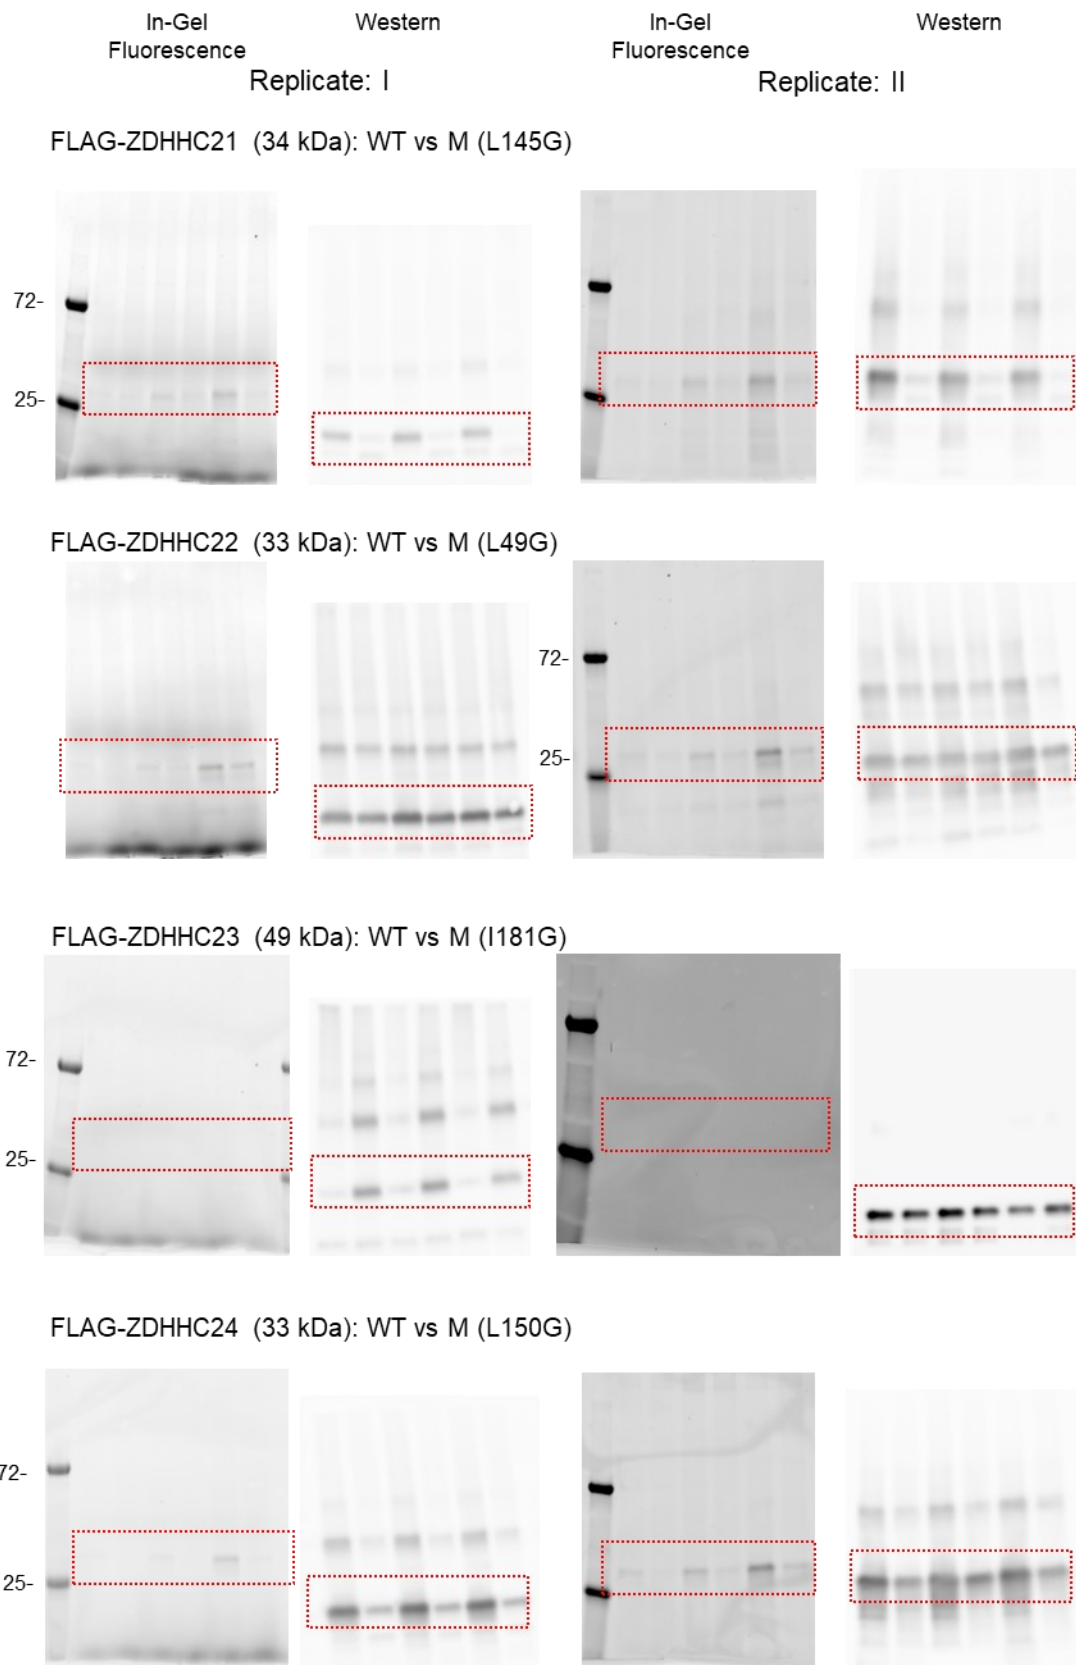

Uncropped western blots for Supplementary Figure 5. Areas within red borders are in the supplementary figure.
