# Supplementary material for: A palmitoyl transferase chemical–genetic system to map ZDHHC-specific S-acylation
Source: PubMed Central journal article supplement (PMC11471619; doi:10.1038/s41587-023-02030-0), 2024-01-08
Supplement: 41587_2023_2030_MOESM4_ESM.pdf [file 41587_2023_2030_MOESM4_ESM.pdf]

# Appendix

A palmitoyl transferase chemical genetic system to map ZDHHC-specific S-acylation

Cory A. Ocasio<sup>1, †</sup>, James Siphthorp<sup>1,2, †</sup>, Marc P. Baggelaar<sup>1,2, ‡, †</sup>, Ana Losada de la Lastra<sup>1,2</sup>,  
Manuel Tavares<sup>2</sup>, Jana Volarić<sup>2</sup>, Christelle Soudy<sup>1</sup>, Elisabeth M. Storck<sup>3</sup>, Jack W.  
Houghton<sup>1</sup>, Susana A. Palma-Duran<sup>1</sup>, James I. MacRae<sup>1</sup>, Goran Tomic<sup>1</sup>, Lotte Carr<sup>1</sup>, Julian  
Downward<sup>1</sup>, Ulrike S. Eggert<sup>3</sup> and Edward W. Tate<sup>1,2,\*</sup>

## **Affiliations:**

<sup>1</sup>The Francis Crick Institute; London, NW1 1AT (UK)

<sup>2</sup>Imperial College London; Department of Chemistry, Molecular Sciences Research Hub,  
London, W12 0BZ (UK)

<sup>3</sup>King's College London; Randall Centre for Cell and Molecular Biophysics, School of Basic  
and Medical Biosciences and Department of Chemistry, London, SE1 1UL (UK)

‡: Current address: Utrecht University; Biomolecular Mass Spectrometry & Proteomics Group,  
3584 CH Utrecht (NL)

†: These authors contributed equally

Correspondence to: [e.tate@imperial.ac.uk](mailto:e.tate@imperial.ac.uk)

**Table of contents****Page**

1. Uncropped gels, blots and replicates from Main Figures. 3 – 19
2. Uncropped gels, blots and replicates from Extended Figures. 20 – 31

# Appendix – Main Figures

## Uncropped Gels and Blots

### Main Figure 2C

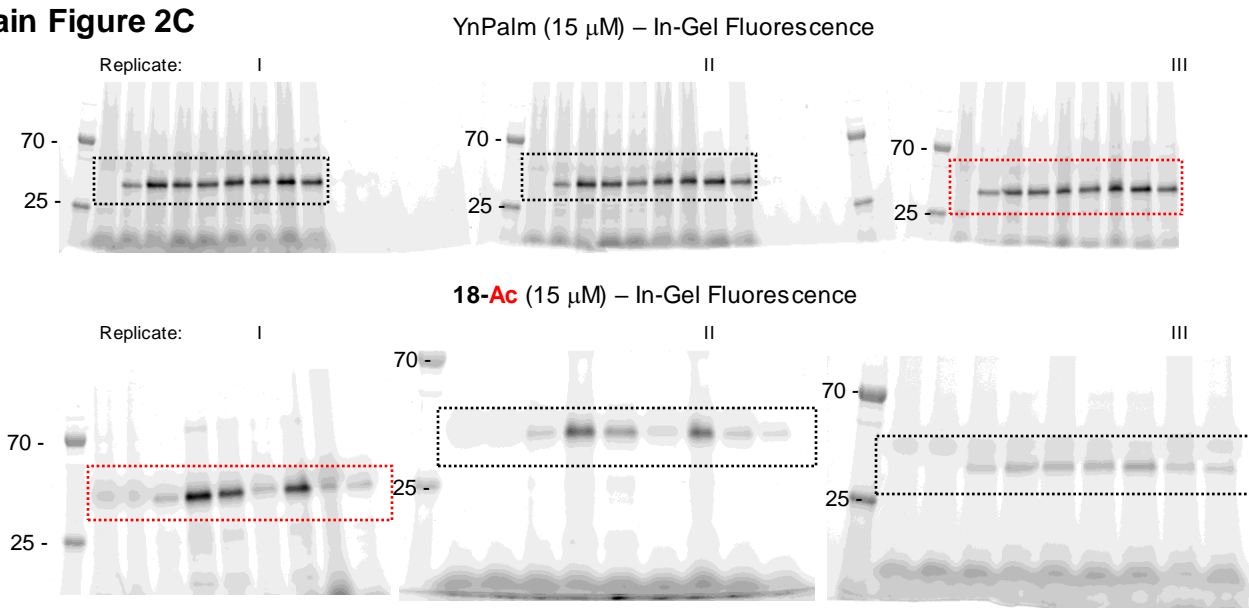

### Main Figure 2E

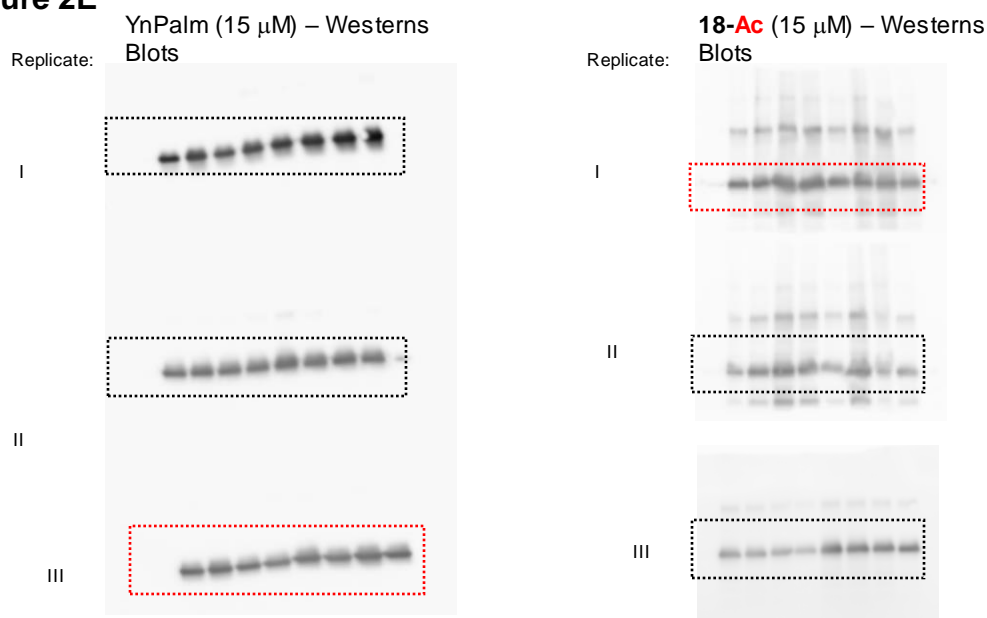

Figure A1. Uncropped gels and blots for Main Figure 2C,E. Areas within red borders are in the main figure

### Main Figure 2G

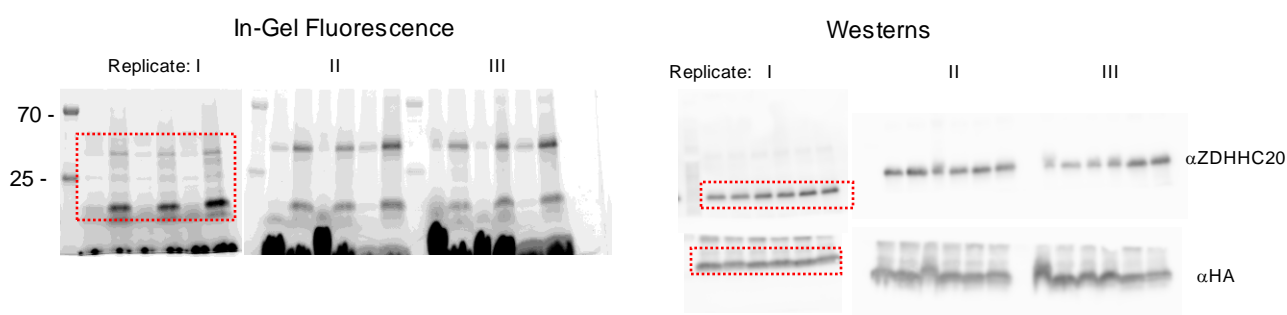

Figure A2. Uncropped gels and blots for Main Figure 2G. Areas within red borders are in the main figure

## Main Figure 3F

C18Bz – Westerns Blots for ZDHHC(wt) and ZDHHC (M)

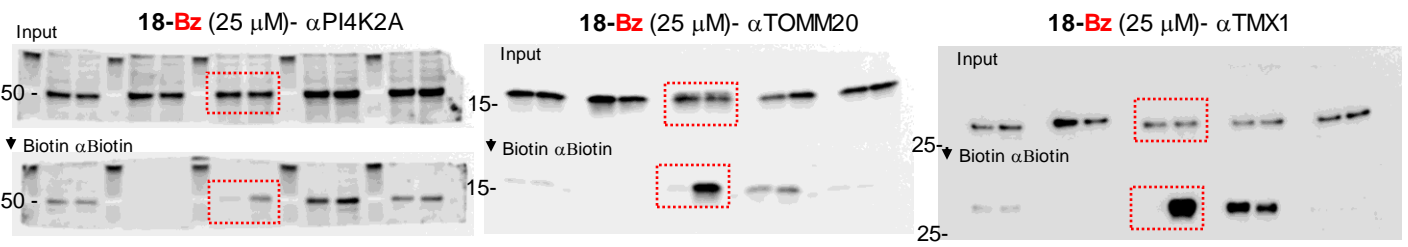

## Main Figure 3G

YnPal – Westerns Blots for ZDHHC(wt) and ZDHHC (M)

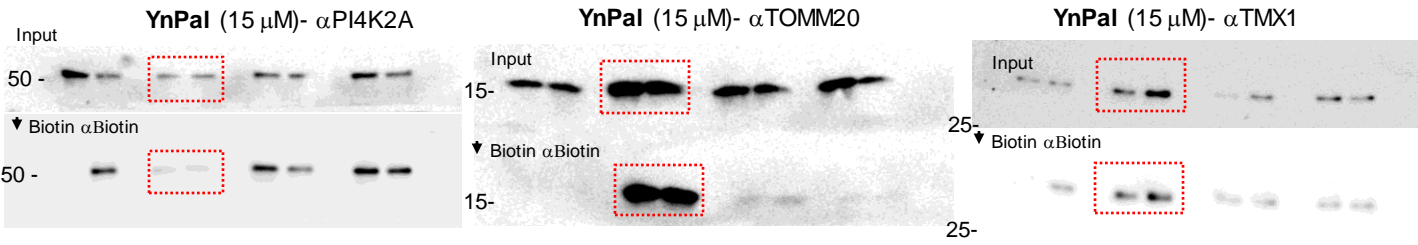

Figure A3. Uncropped gels and blots for Main Figure 3F and 3G. Areas within red borders are in the main figure

**Main Figure 4A**

IFITM3 Rep 1

IFITM3 Rep 1 TAMRA

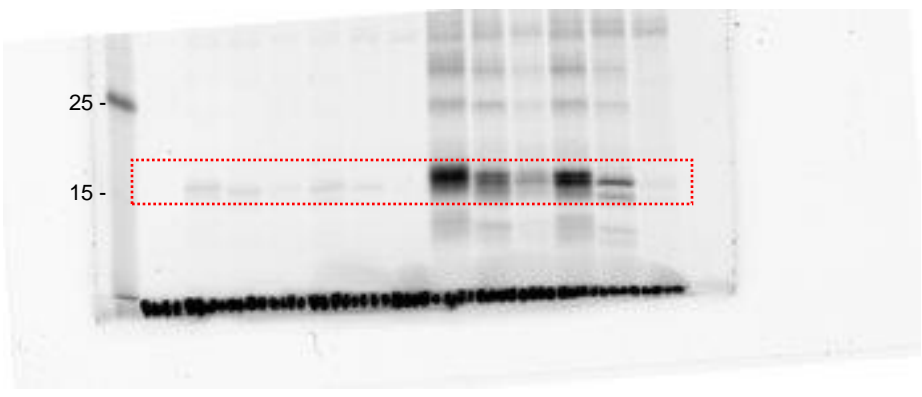

IFITM3 Rep 1 HA IP

IFITM3 Rep 1 HA input

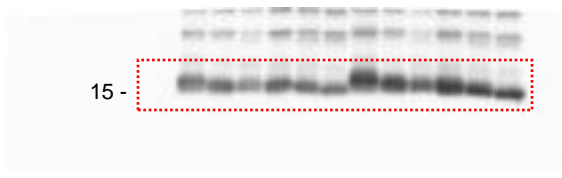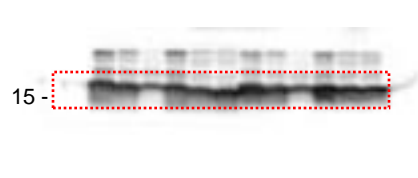

IFITM3 Rep 1 tubulin

IFITM3 Rep 1 FLAG input

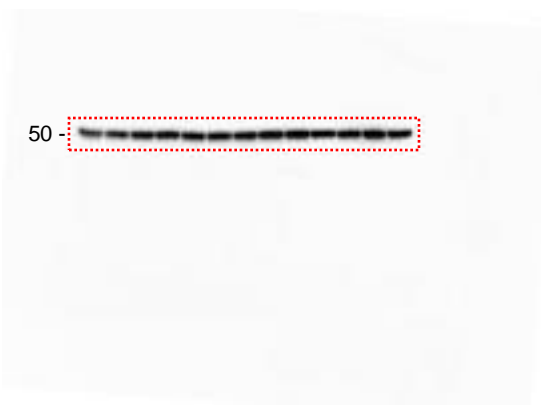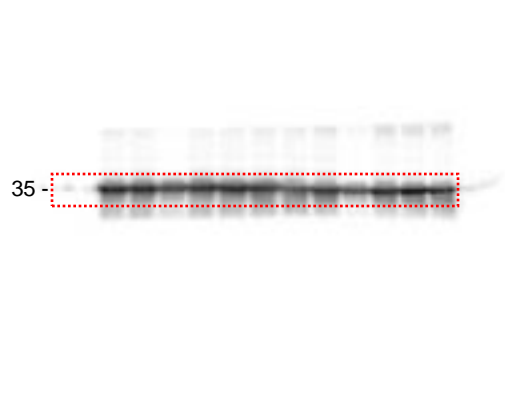

Figure A4. Uncropped gels and westerns for Main Figure 4A, replicate set 1. Areas within red borders are in the main figure.

# Main Figure 4A

IFITM3 Rep 2

| N-HA-IFITM3<br>Cys to Ala mutants | E | W | 71 | 72 | 105 | 71/72 | 71/72/105 | W        | 71       | 72       | 105      | 71/72    | 71/72/105 |
|-----------------------------------|---|---|----|----|-----|-------|-----------|----------|----------|----------|----------|----------|-----------|
| C-FLAG-zDHHC20                    | - | W | W  | W  | W   | W     | W         | <b>M</b> | <b>M</b> | <b>M</b> | <b>M</b> | <b>M</b> | <b>M</b>  |
| C18-Bz 15 $\mu$ M                 | + | + | +  | +  | +   | +     | +         | +        | +        | +        | +        | +        | +         |

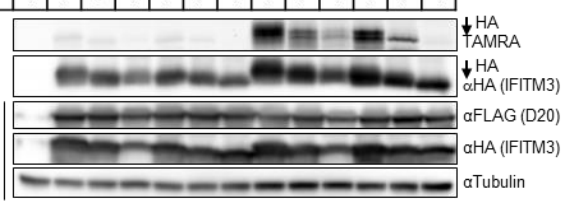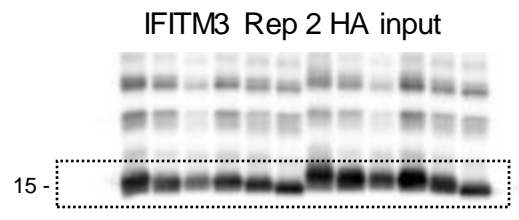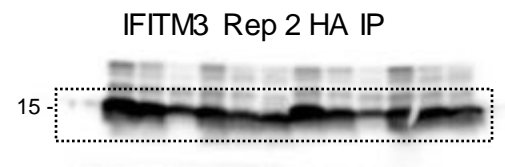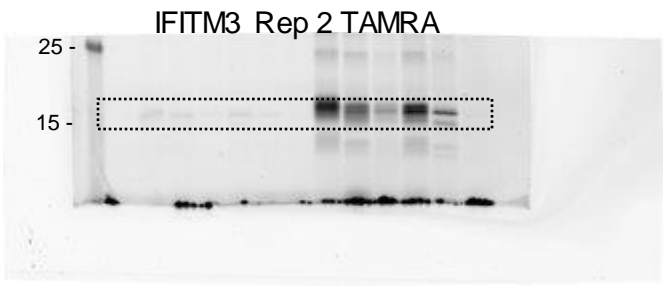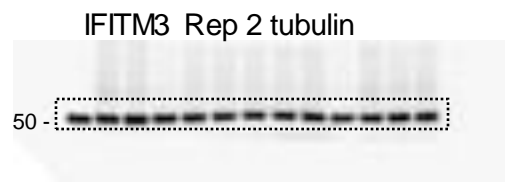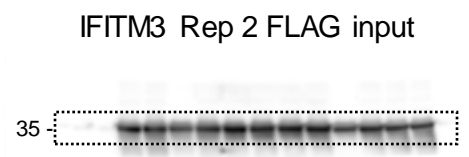

Figure A5. Uncropped gels and westerns for Main Figure 4A, replicate sets 2–3. Areas within red borders are in the main figure.

**Main Figure 4A**

IFITM3 Rep 3

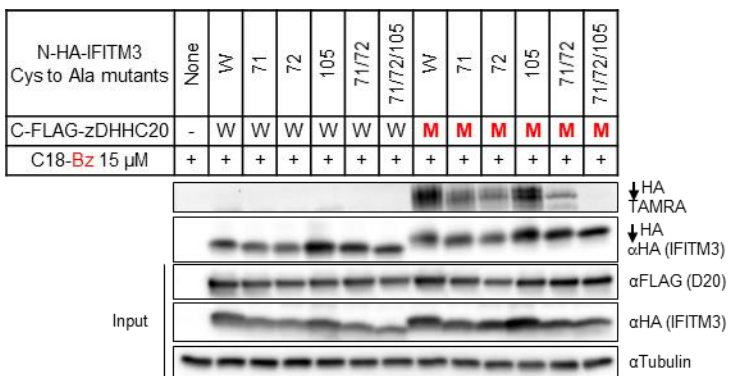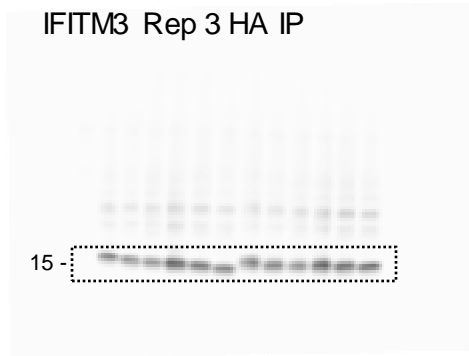

IFITM3 Rep 3 TAMRA

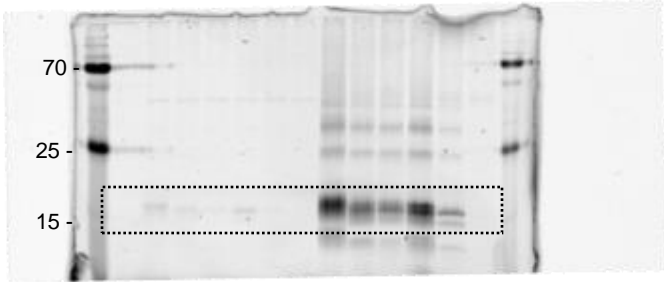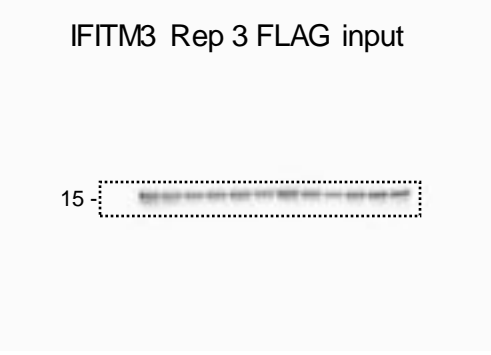

IFITM3 Rep 3 HA input

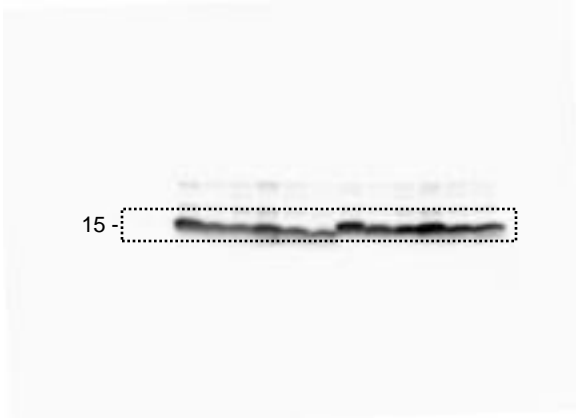

IFITM3 Rep 1 tubulin

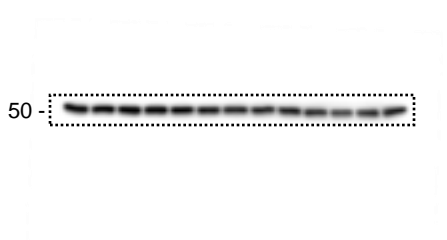

Figure A6 cont. Uncropped gels and westerns for Main Figure 4A, replicate sets 2 – 3. Areas within red borders are in the main figure.

**Main Figure 4B**

**PI4K2A Rep 1**

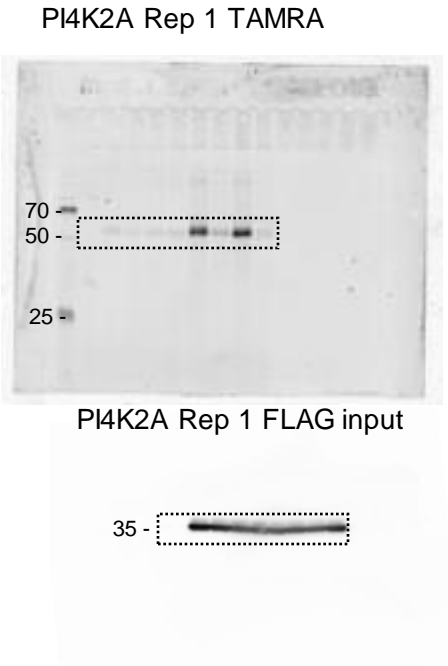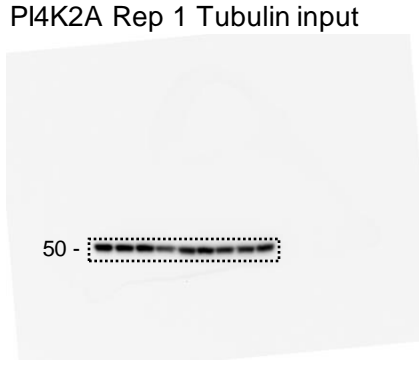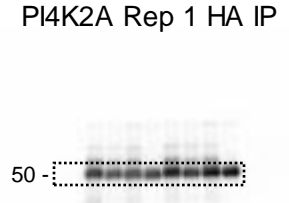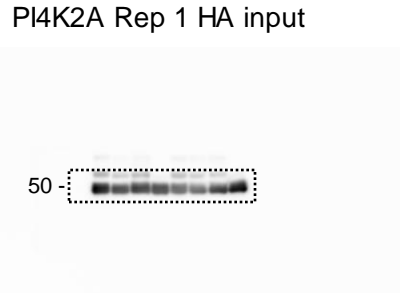

**PI4K2A Rep 2**

|                                   |      |   |            |            |                   |    |            |            |            |
|-----------------------------------|------|---|------------|------------|-------------------|----|------------|------------|------------|
| N-HA-PI4K2A<br>Cys to Ala mutants | None | W | 174<br>175 | 177<br>178 | 174<br>175<br>178 | WT | 174<br>175 | 177<br>178 | 174<br>175 |
| C-FLAG-zDHHC20                    | -    | W | W          | W          | W                 | M  | M          | M          | M          |
| C18-Bz 15 μM                      | +    | + | +          | +          | +                 | +  | +          | +          | +          |

Input

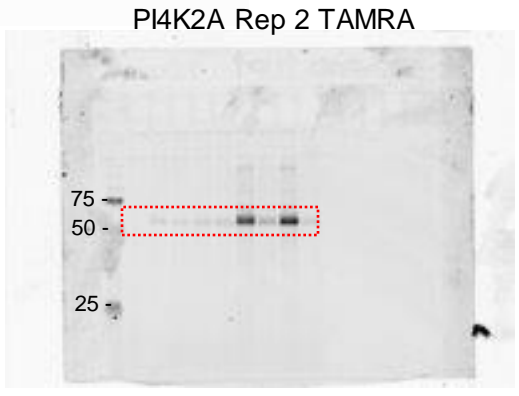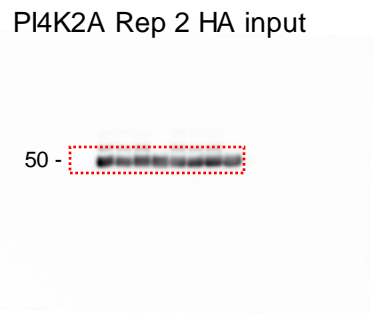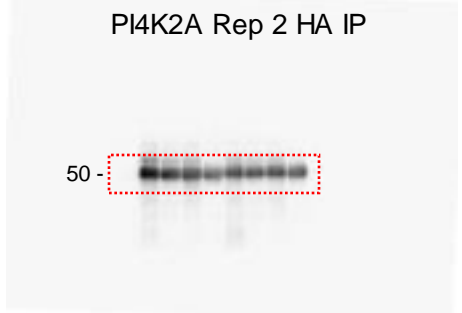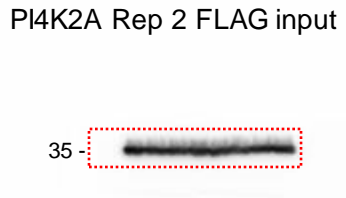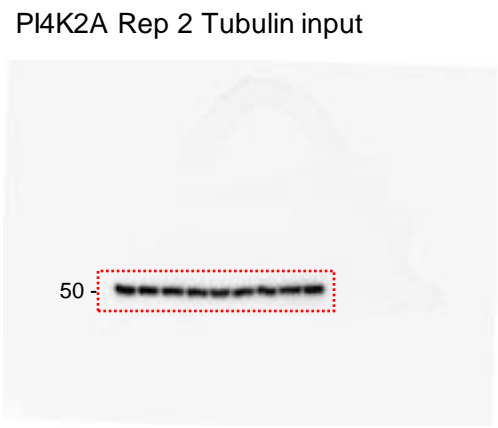

Figure A7. Uncropped gels and westerns for Main Figure 4B, replicate sets 1 – 2. Areas within red borders are in the main figure.



**Main Figure 4B**

PI4K2A Rep 3

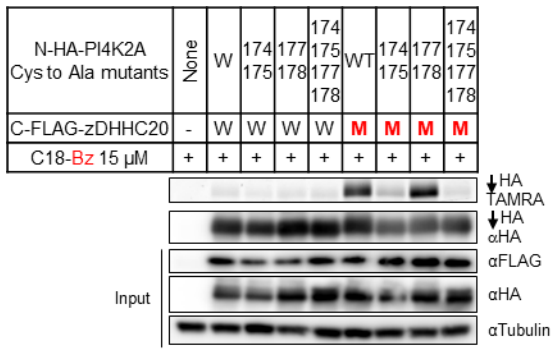

PI4K2A Rep 3 TAMRA

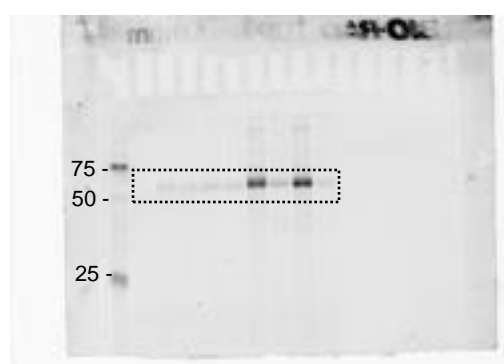

PI4K2A Rep 3 HA input

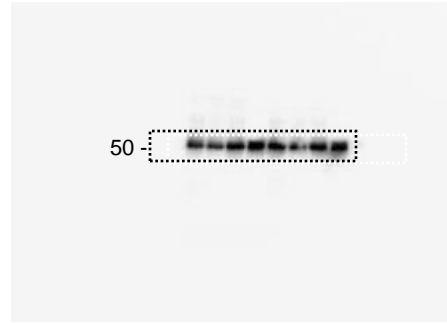

PI4K2A Rep 3 FLAG input

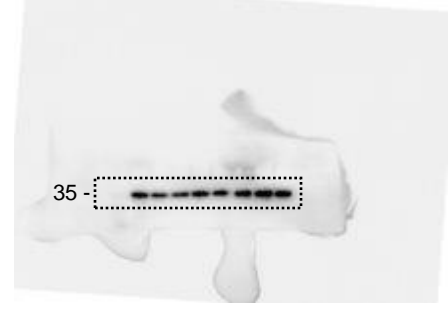

PI4K2A Rep 3 tubulin input

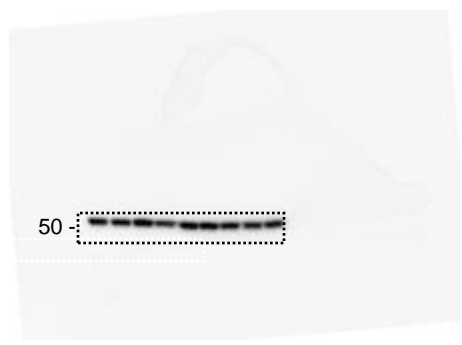

PI4K2A Rep 3 HA IP

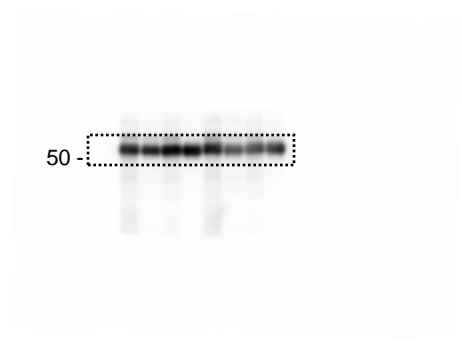

Figure A8. Uncropped gels and westerns for Main Figure 4B, replicate set 3. Areas within red borders are in the main figure.

**Main Figure 4C**

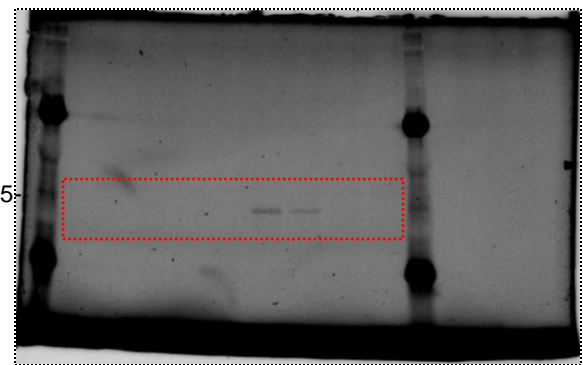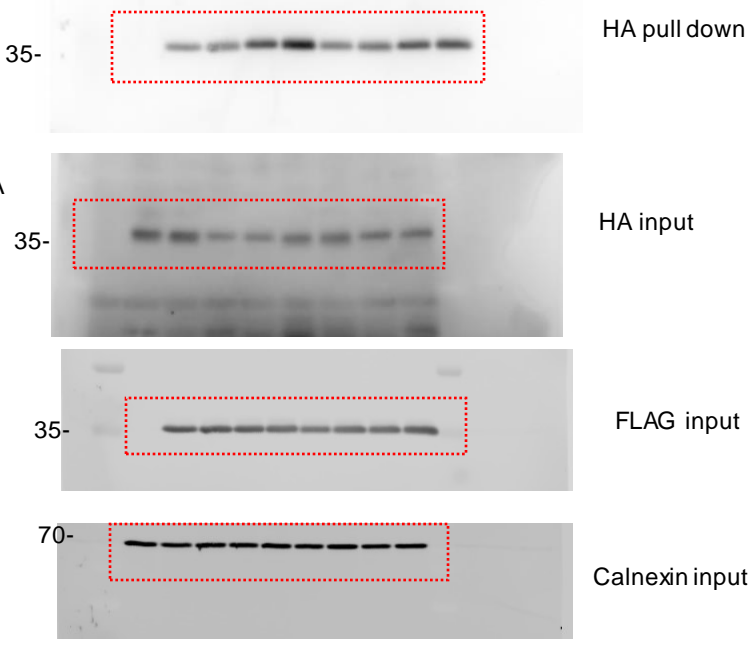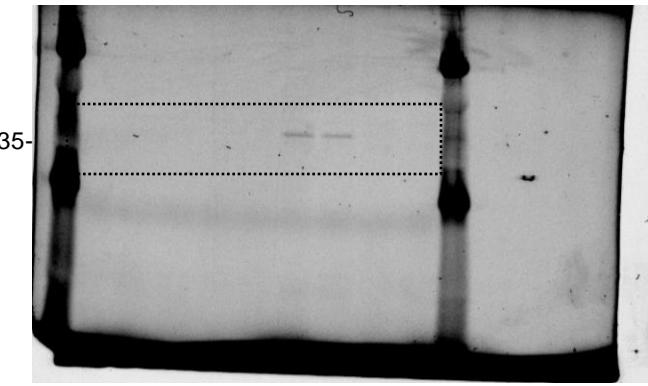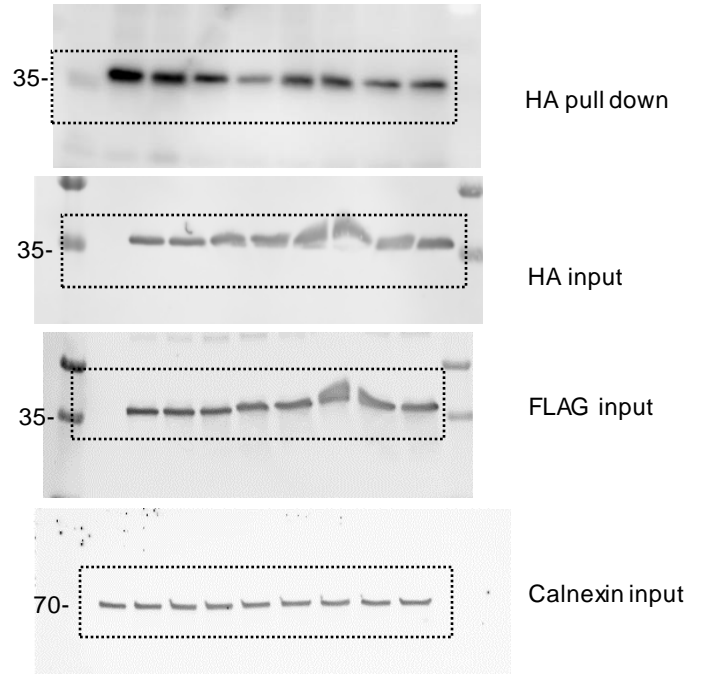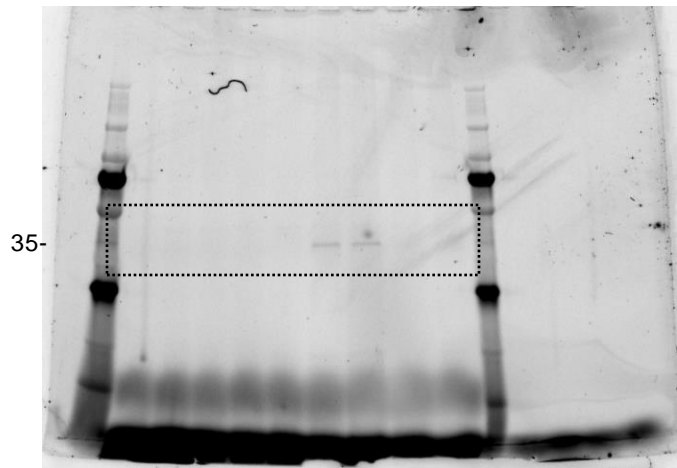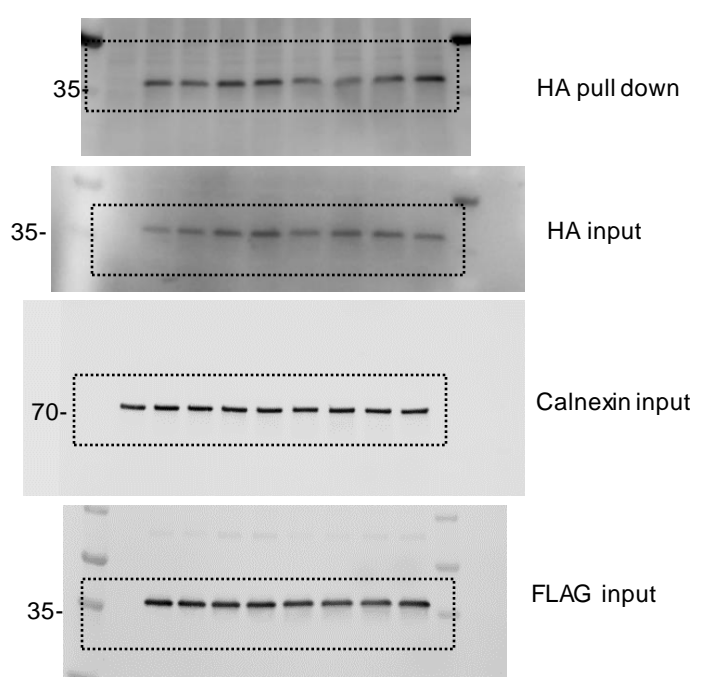

Figure A9. Uncropped gels and westerns for Main Figure 4c. Areas within red borders are in the main figure.

**Main Figure 4D**

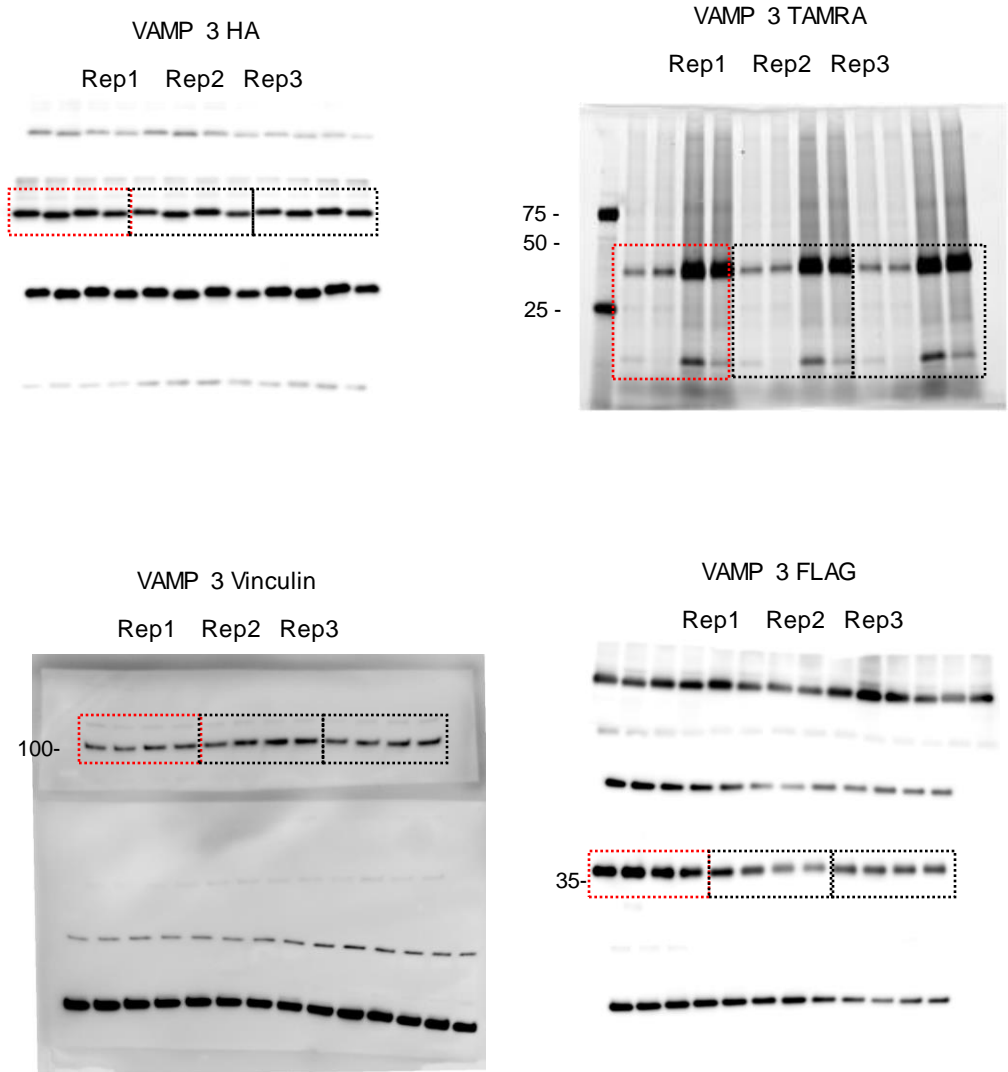

Figure A10. Uncropped gels and westerns for Main Figure 4D. Areas within red borders are in the main figure.

**Main Figure 4E**

BCAP31 – Replicates 1 - 3

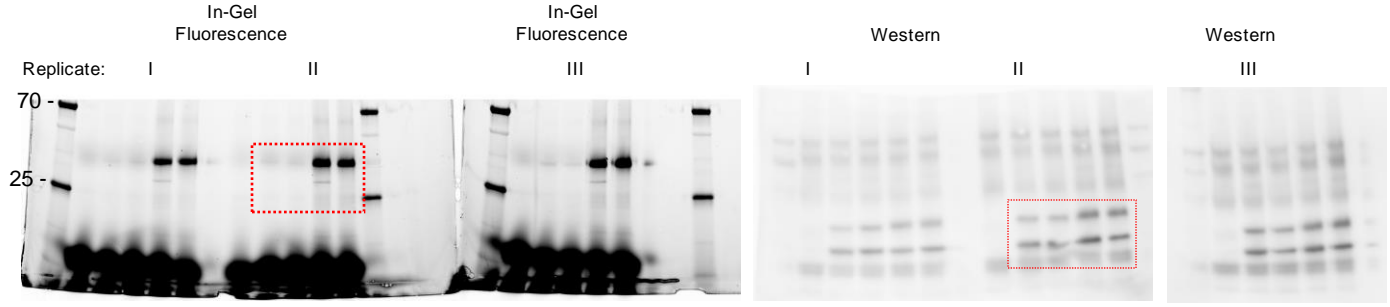

Figure A11. Uncropped gels and westerns for Main Figure 4E. Areas within red borders are in the main figure.

**Main Figure 4F**

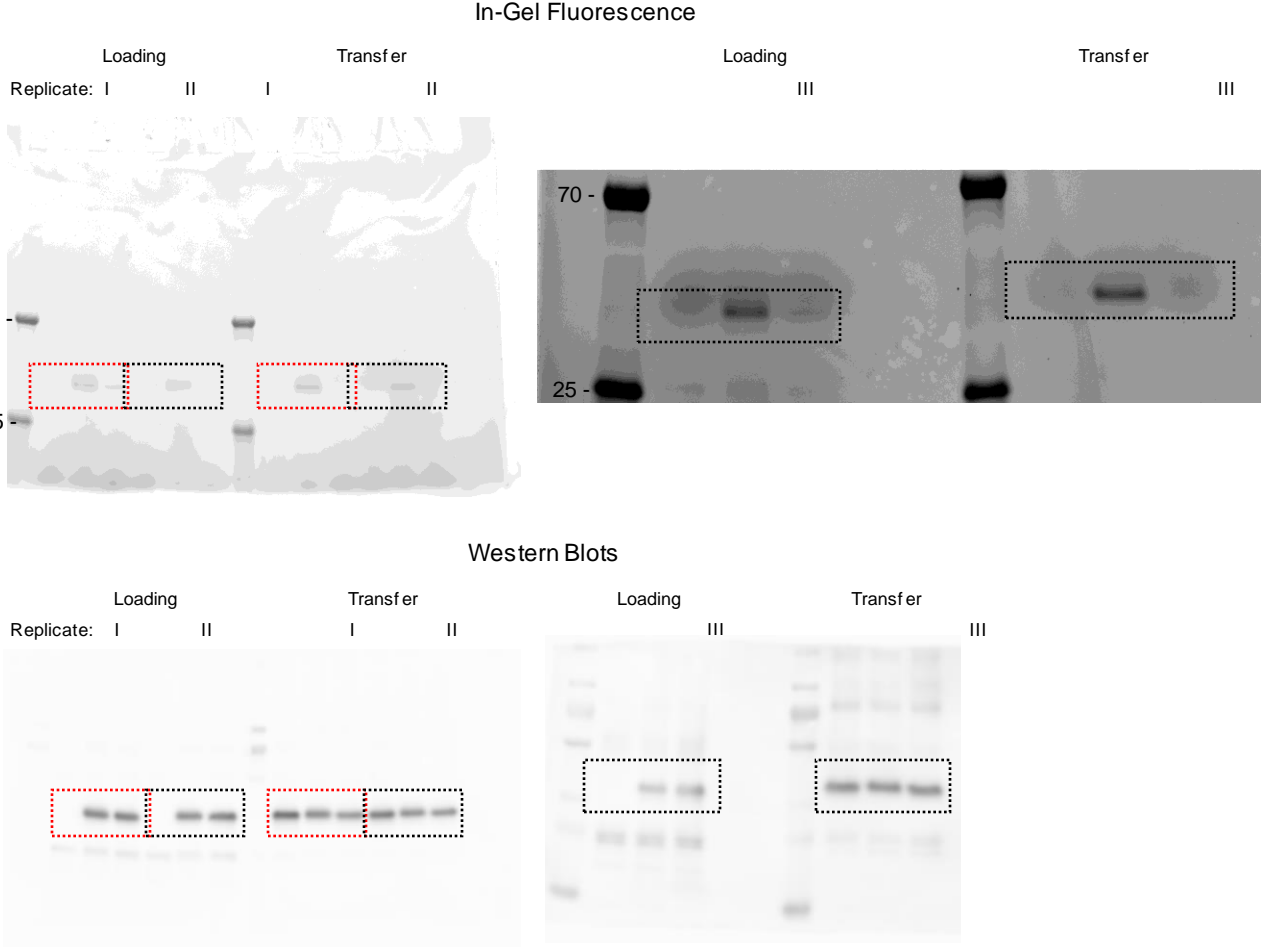

Figure A12. Uncropped gels and westerns for Main Figure 4F, replicate sets 1 - 3. Areas within red borders are in the main figure.

# Main Figure 5A

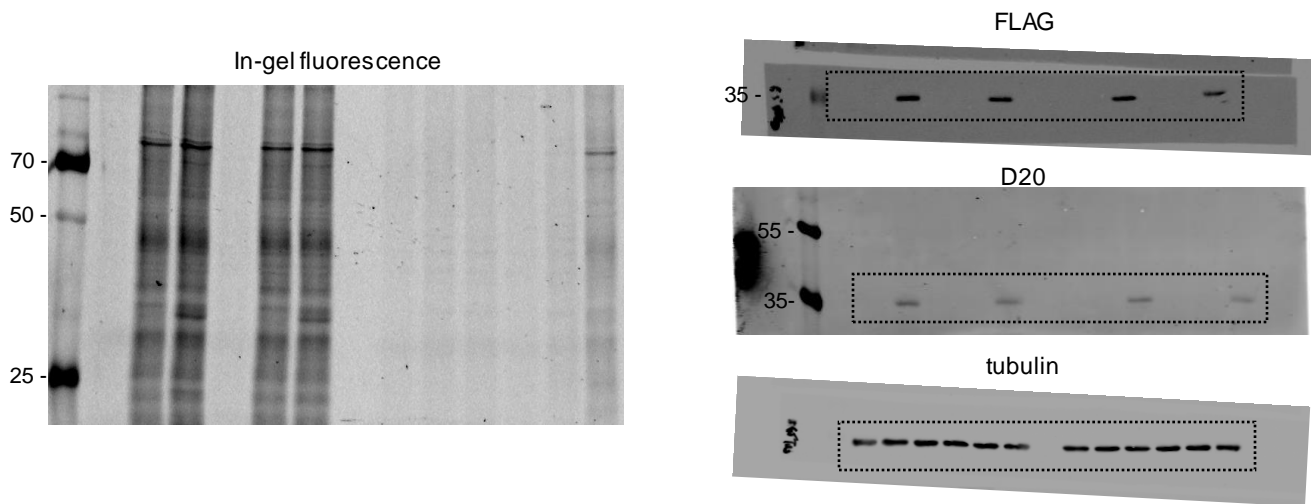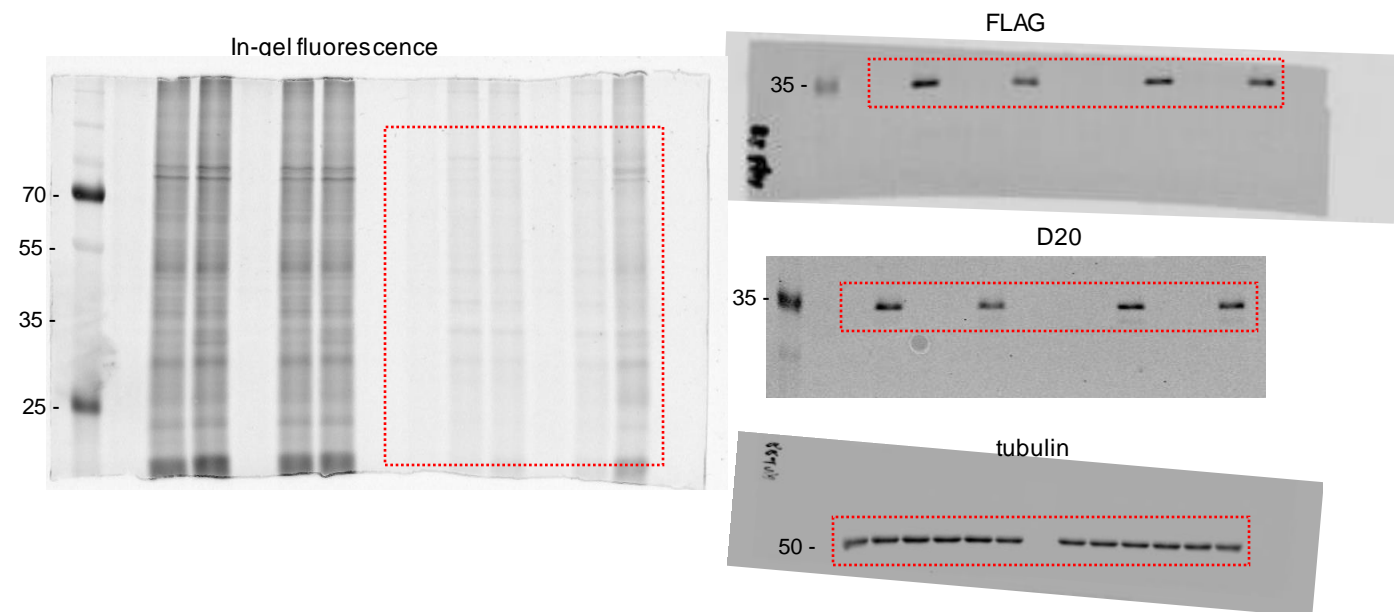

Figure A13. Uncropped gels and westerns for Main Figure 5F. Areas within red borders are in the main figure.

### Main Figure 5B rep1

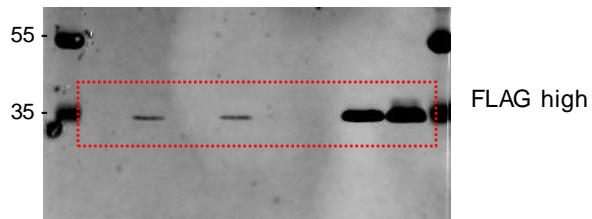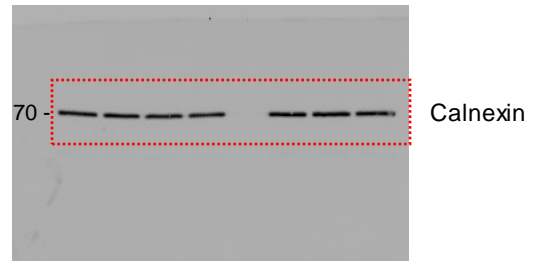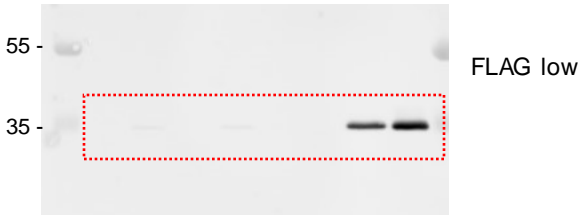

### Main Figure 5B rep2

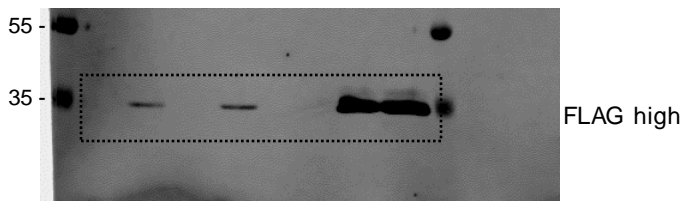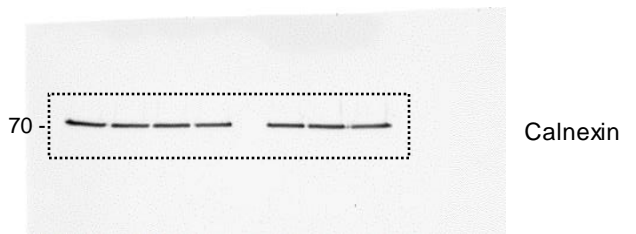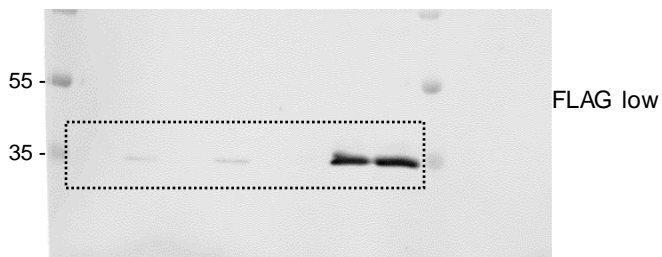

### Main Figure 5B rep3

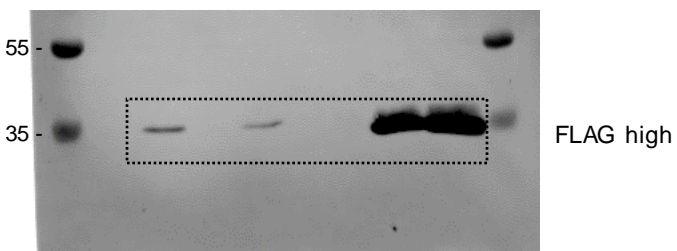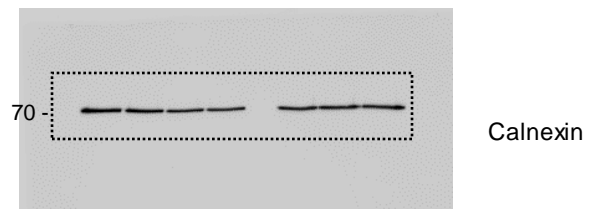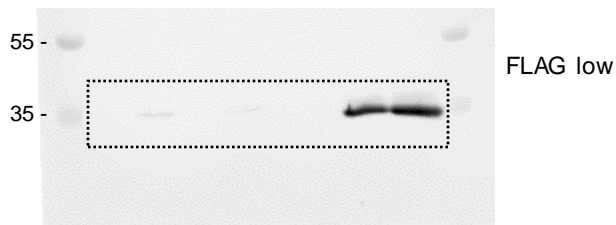

Figure A14. Uncropped gels and westerns for Main Figure 5B. Areas within red borders are in the main figure.

# Main Figure 5C

Replicate 1

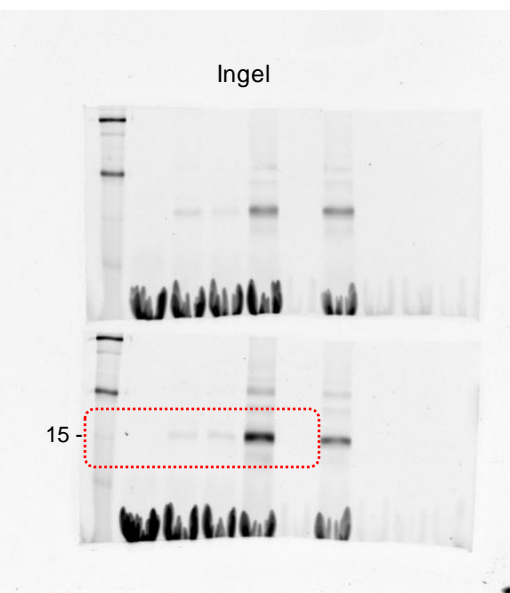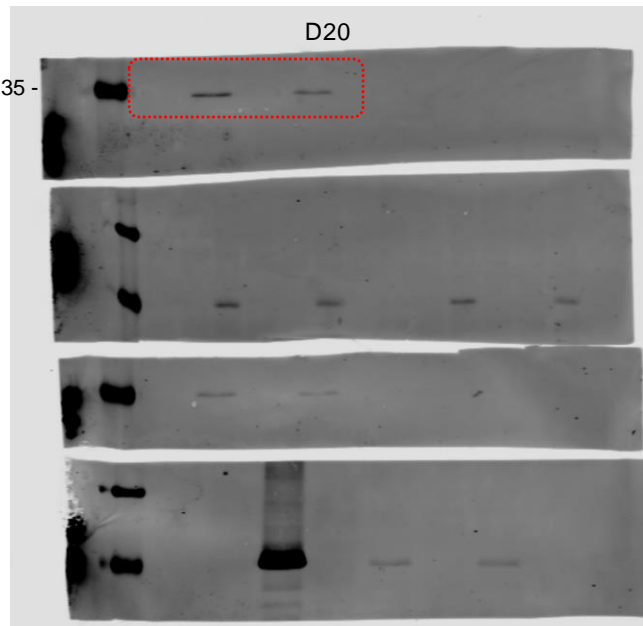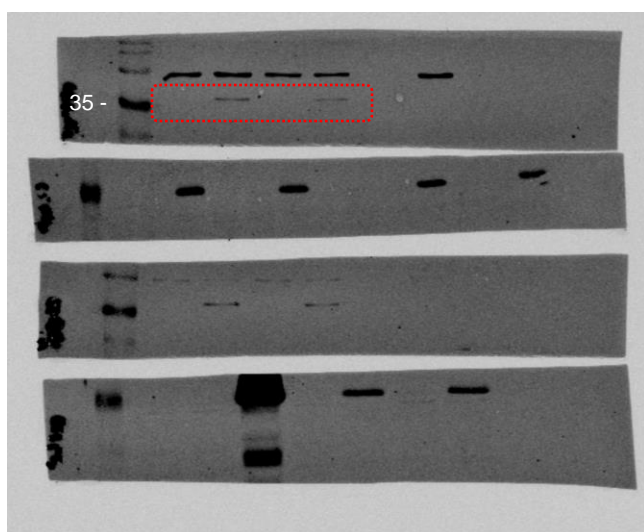

FLAG

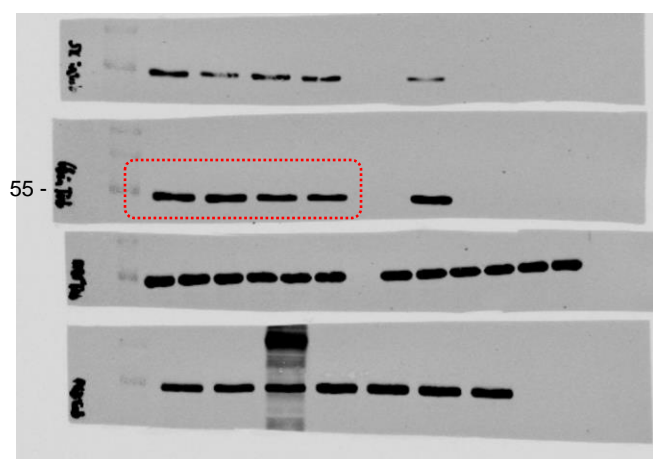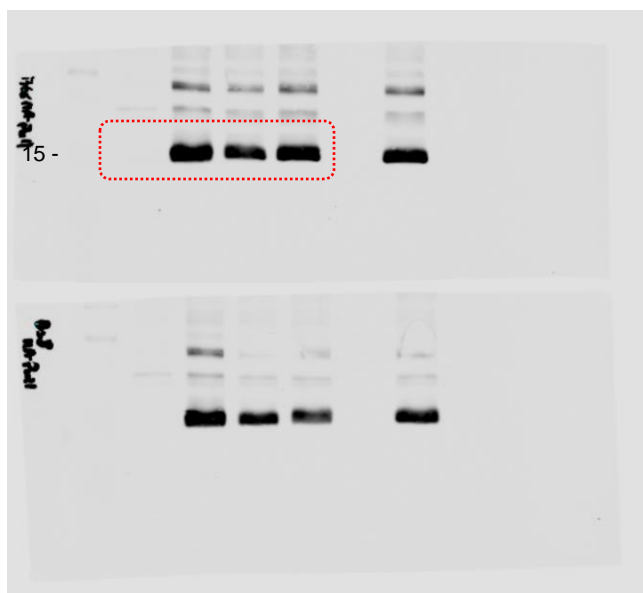

Figure A15. Uncropped gels and westerns for Main Figure 5C. Areas within red borders are in the main figure.

# Main Figure 5C

Replicate 2

Ingel

15-

15-

HA pull

D20

35-

Tub

FLAG

5-

Figure A16. Uncropped gels and westerns for Main Figure 5C. Areas within red borders are in the main figure.



# Main Figure 5C

Replicate 3

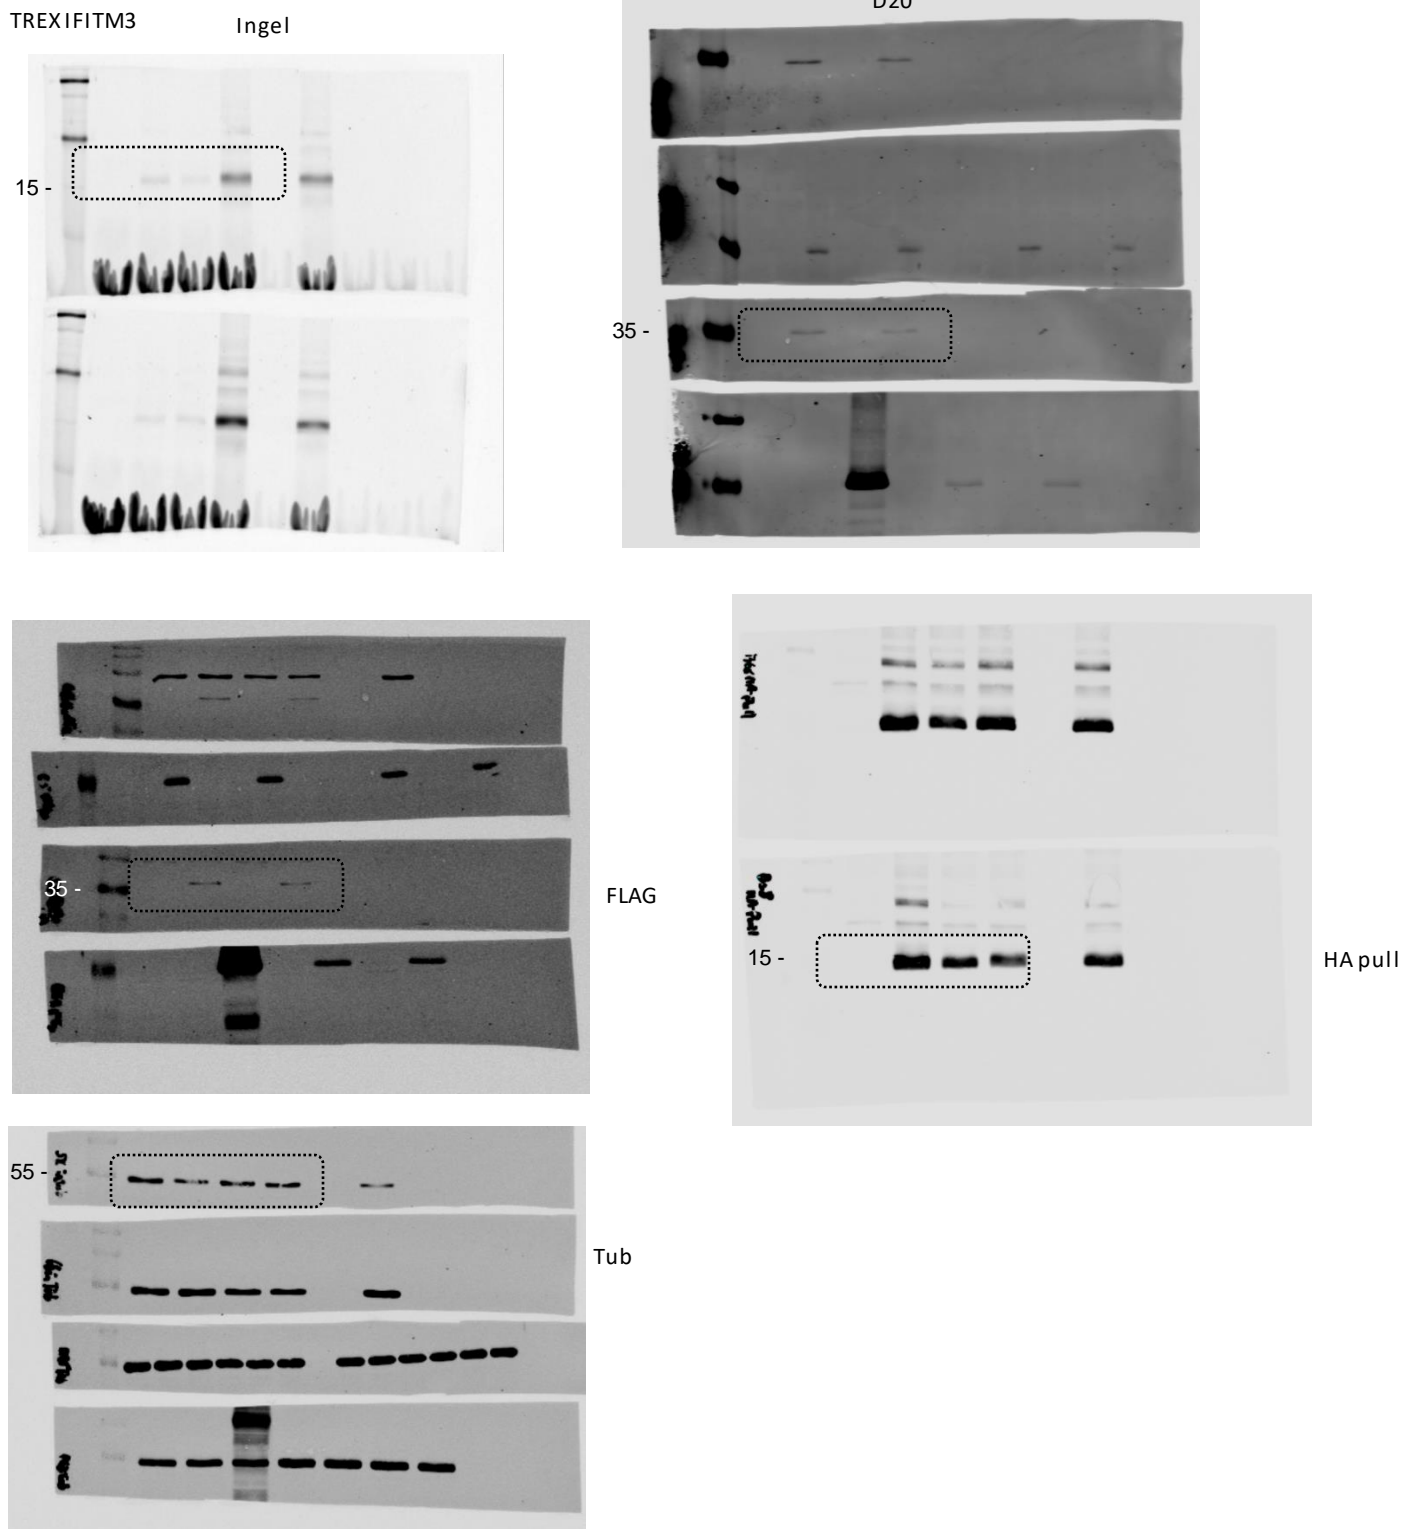

Figure A17. Uncropped gels and westerns for Main Figure 5C. Areas within red borders are in the main figure.

## Main Figure 5E

C18Bz – Westerns Blots for Trex ZDHHC(wt) and ZDHHC (M)

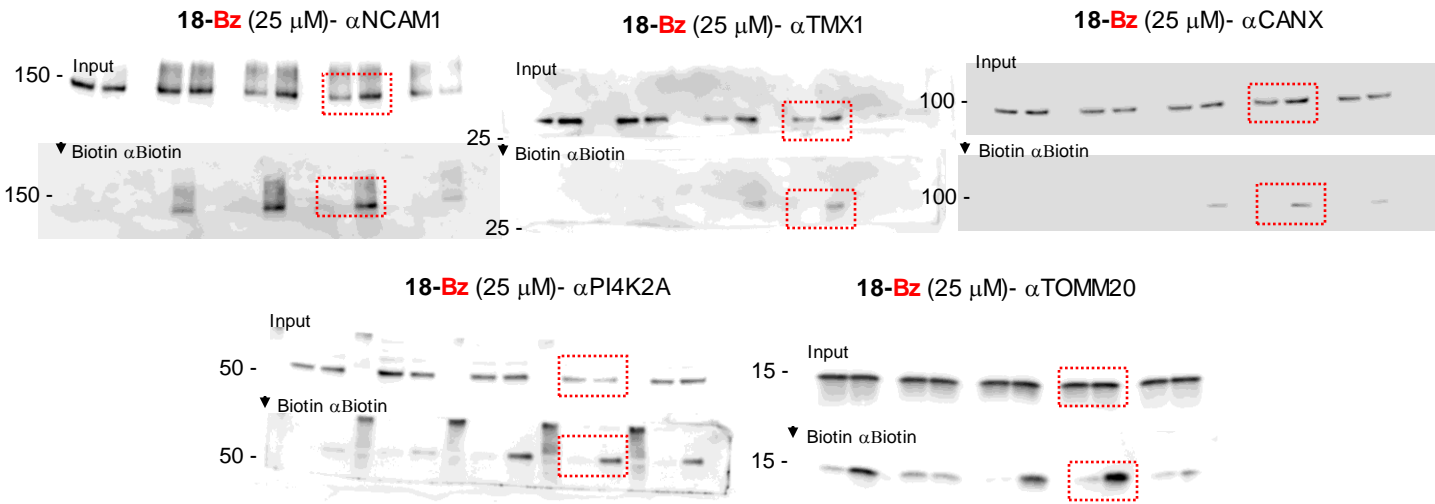

## Main Figure 5F

YnPal – Westerns Blots for Trex ZDHHC(wt) and ZDHHC (M)

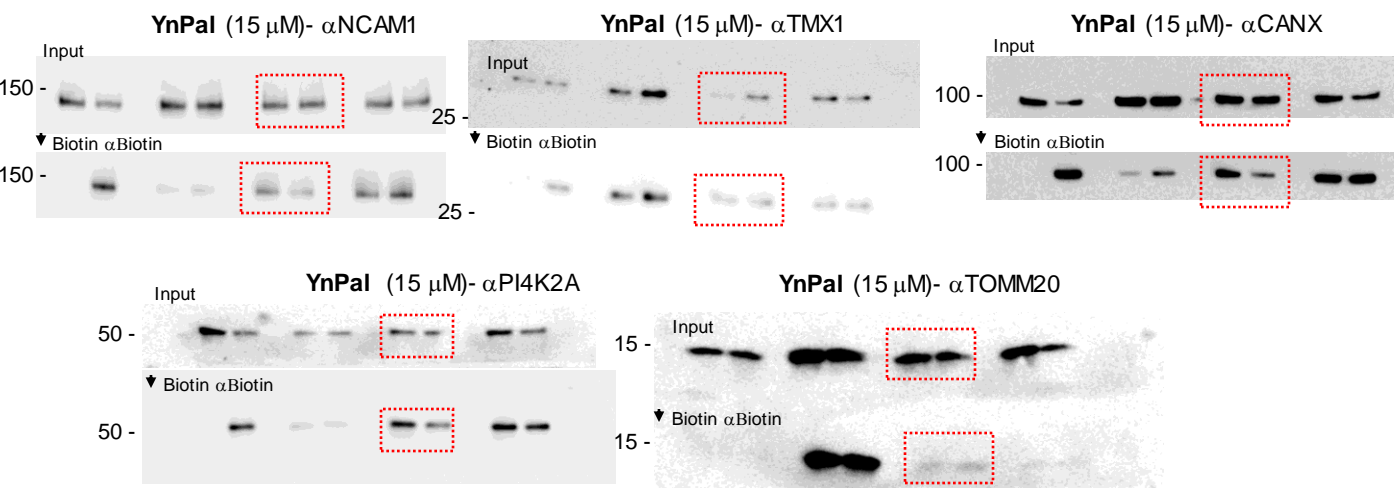

Figure A18. Uncropped gels and westerns for Main Figure 5E and 5F. Areas within red borders are in the main figure.

# Main Figure 6B

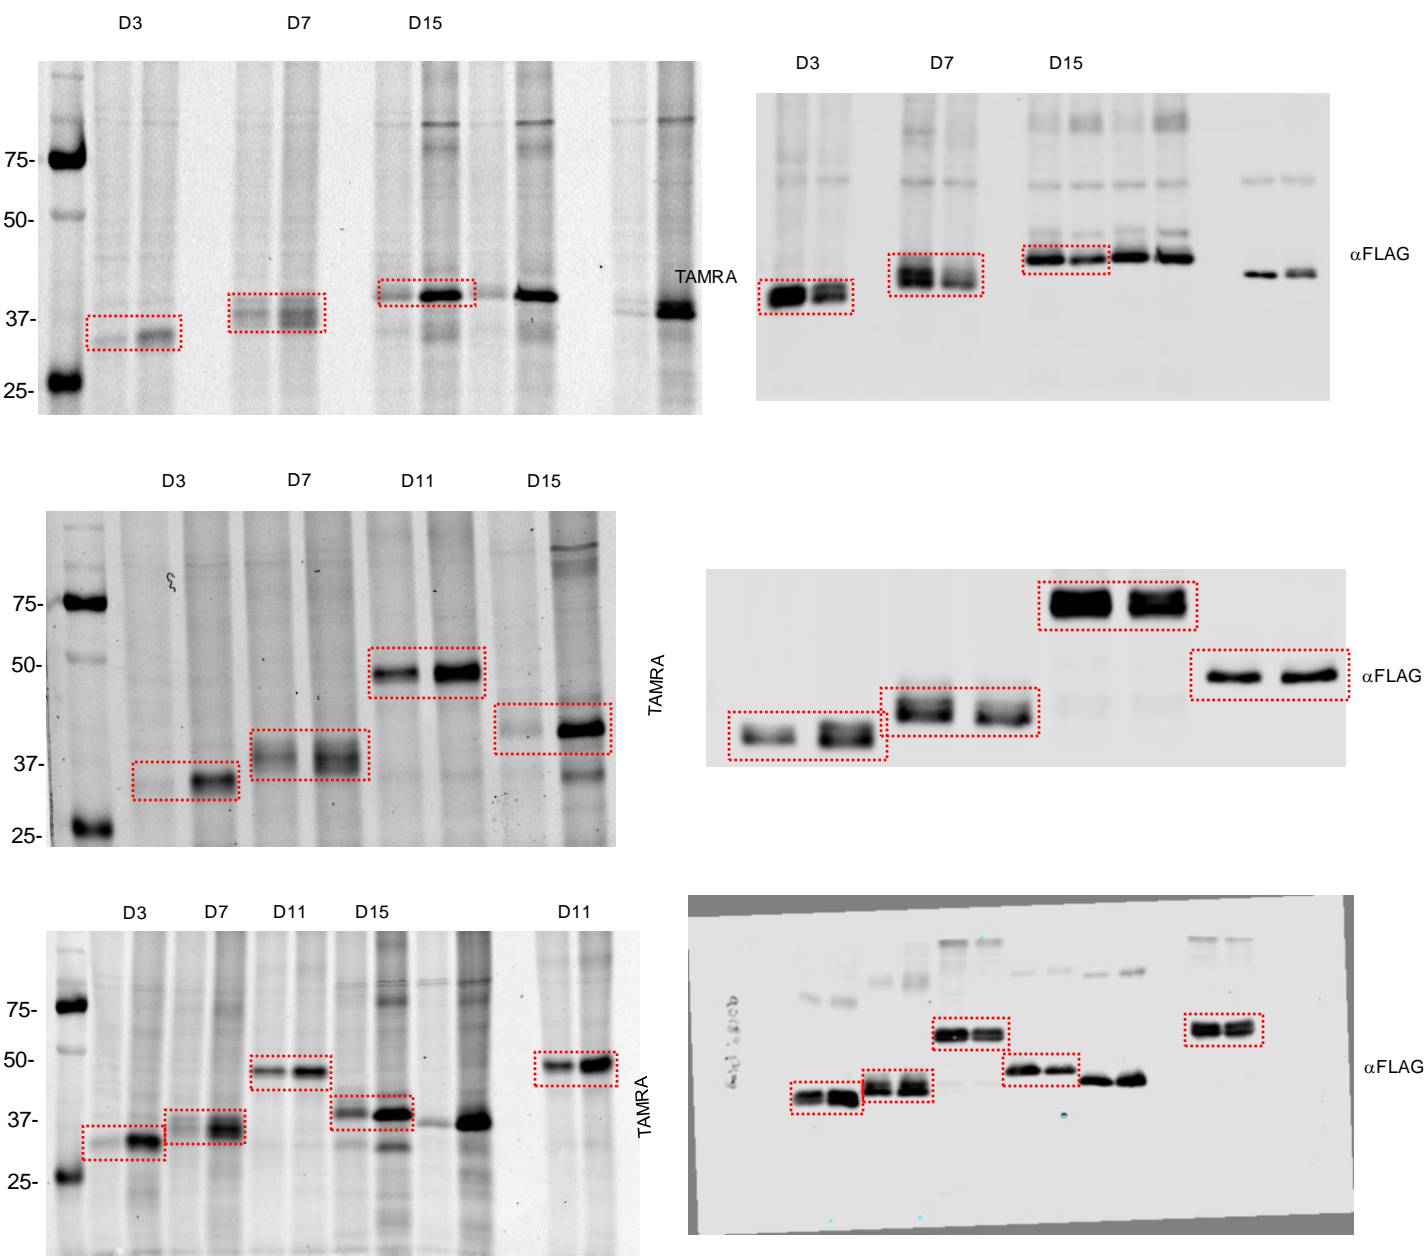

Figure A19. Uncropped gels and westerns for Main Figure 6B. Areas within red borders are in the supplementary figure.

# Extended Data Figure 1A and E

## YnPalm Dose Response – In-Gel Fluorescence

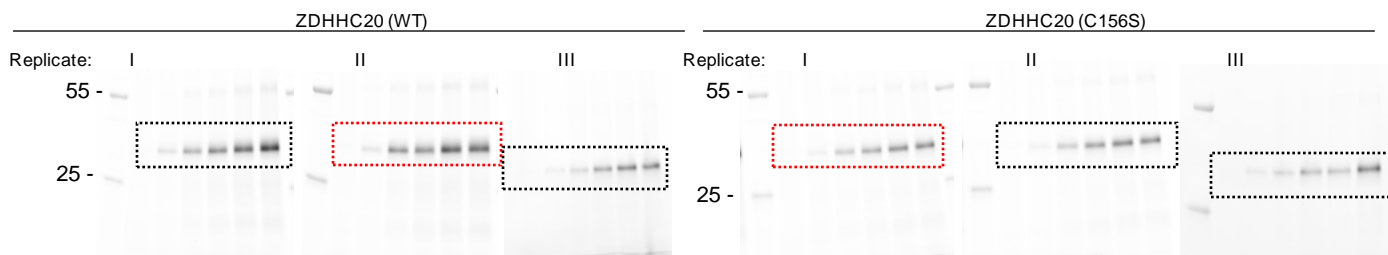

### 1A YnPalm Dose Response – Westerns

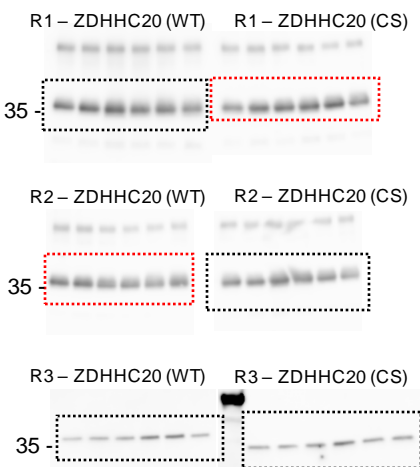

### 1E YnPalm Time Course – In-Gel Fluorescence

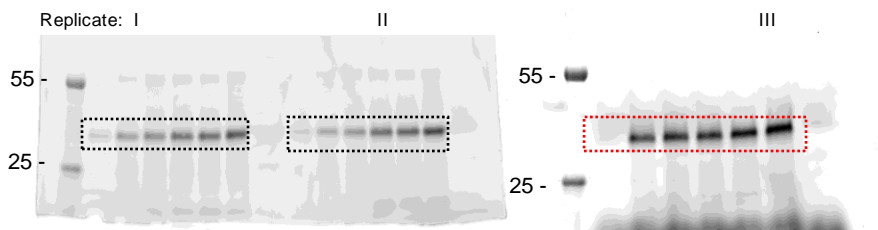

### YnPalm Time Course – Westerns

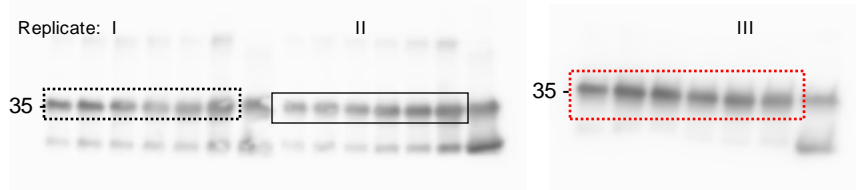

## Extended Data Figure 1C

### NH<sub>2</sub>OH Treatment – In-Gel Fluorescence

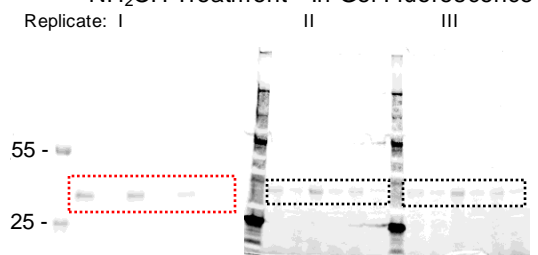

### NH<sub>2</sub>OH treatment – Westerns

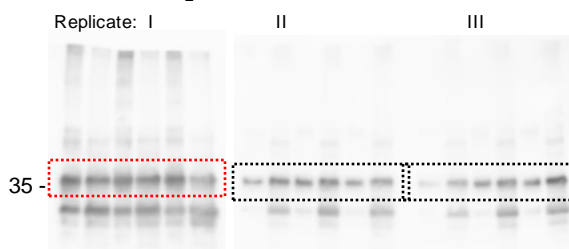

## Extended Data Figure 1G

### YnPalm Dose Response

#### In-gel Fluorescence

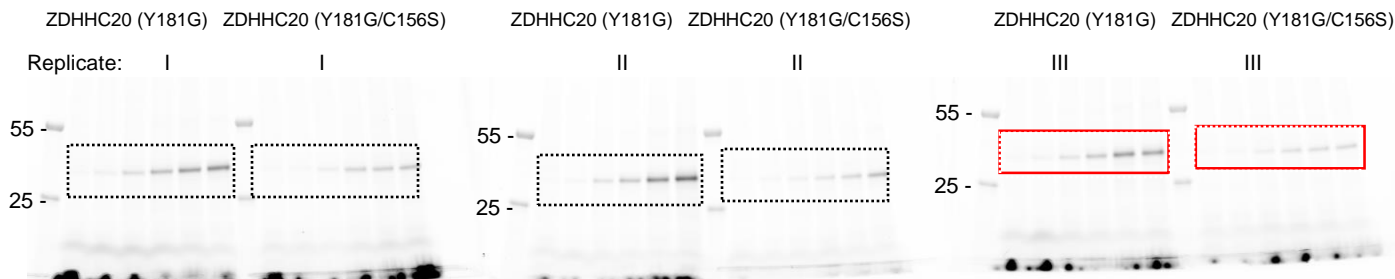

#### Western blots

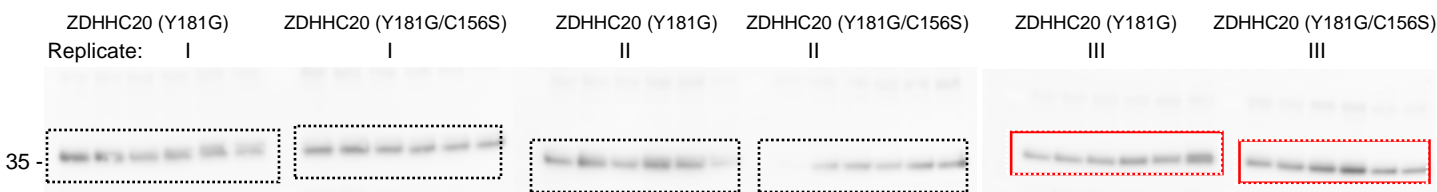

Figure A20. Uncropped gels and blots for Extended Data Figure 1A,C,E,G. Areas within red borders are in the supplementary figure.

# Extended Data Figure 1I and K

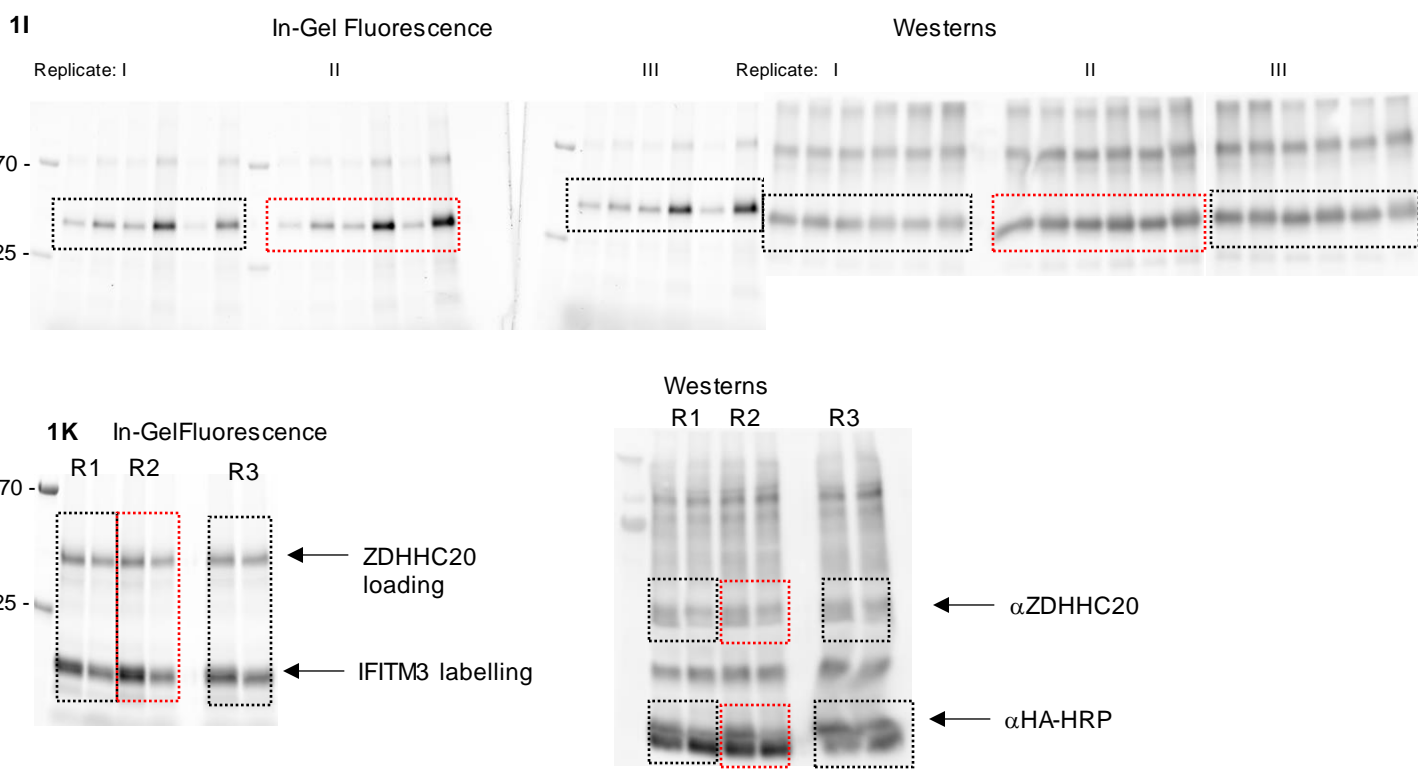

Figure A21. Uncropped gels and blots for Extended Data Figure 1I,K. Areas within red borders are in the supplementary figure.

# Extended Data Figure 2A

Replicate 1

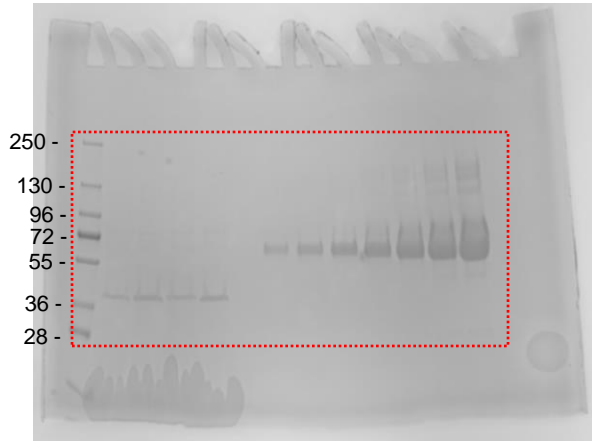

Replicate 3

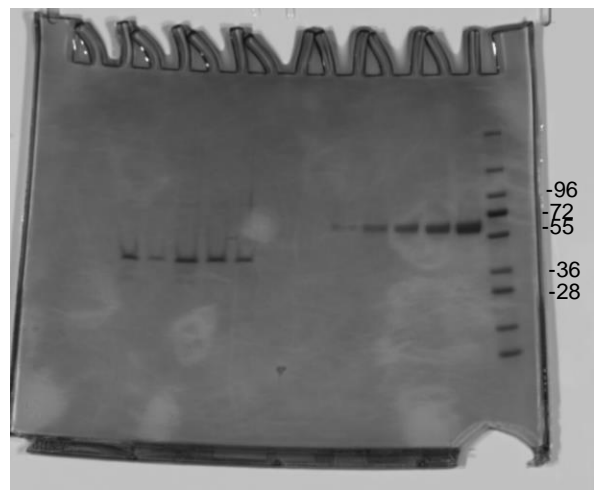

Figure A22. Uncropped gels and blots for Extended Data Figure 2A. Areas within red borders are in the supplementary figure.

## Extended Data Figure 3A

### 18-Bz Dose Response In-Gel Fluorescence

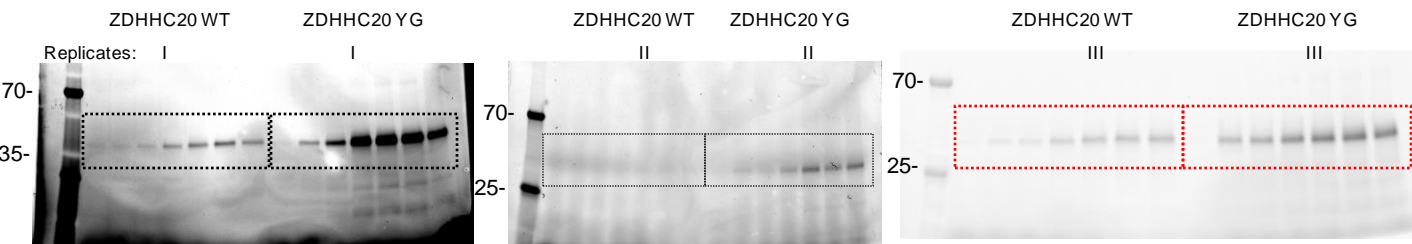

### Westerns

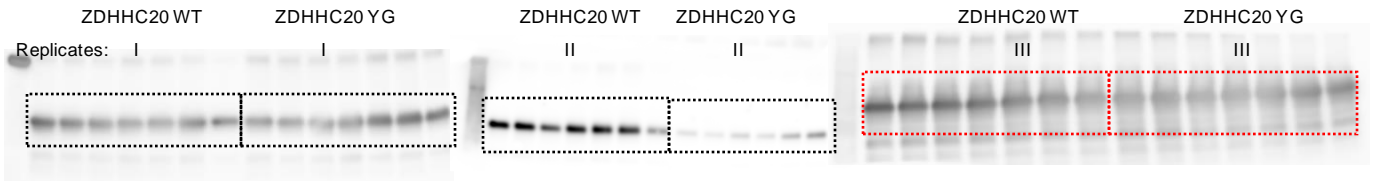

Figure A23. Uncropped gels and westerns for Supplementary Figure 3A. Areas within red borders are in the supplementary figure.

## Extended Data Figure 3C

### 18-Bz Time Course (Y181G) In-gel Fluorescence

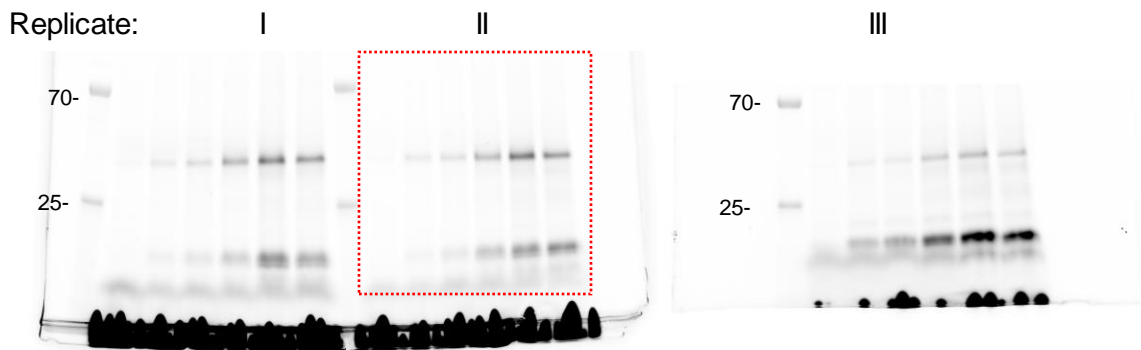

### Western-blot (Flag-IP, anti-zDHHC20)

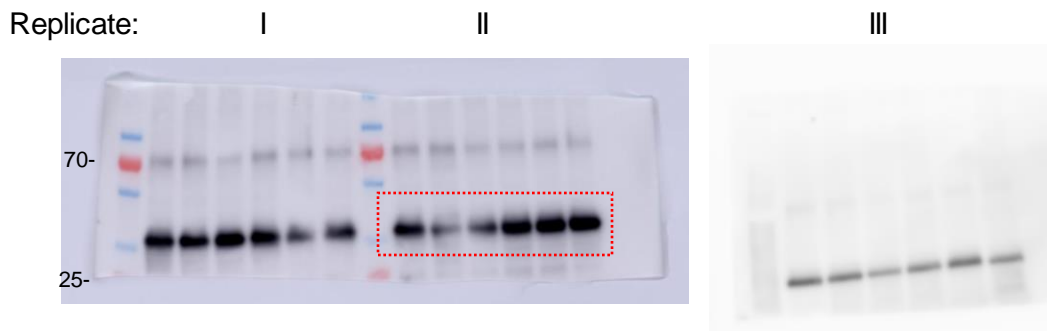

### Western-blot (HA-IP, anti-HA)

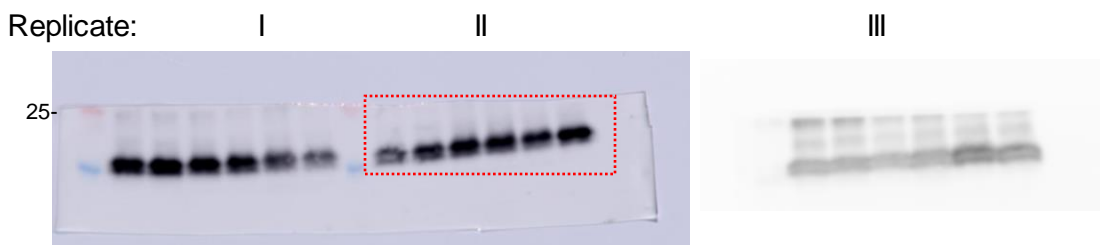

Figure A24. Uncropped gels and westerns for Supplementary Figure 3C. Areas within red borders are in the supplementary figure. Replicates I and II for HA-IP and Flag-IP are overlays of the chemiluminescence scan and the white light image.

# Extended Data Figure 6A

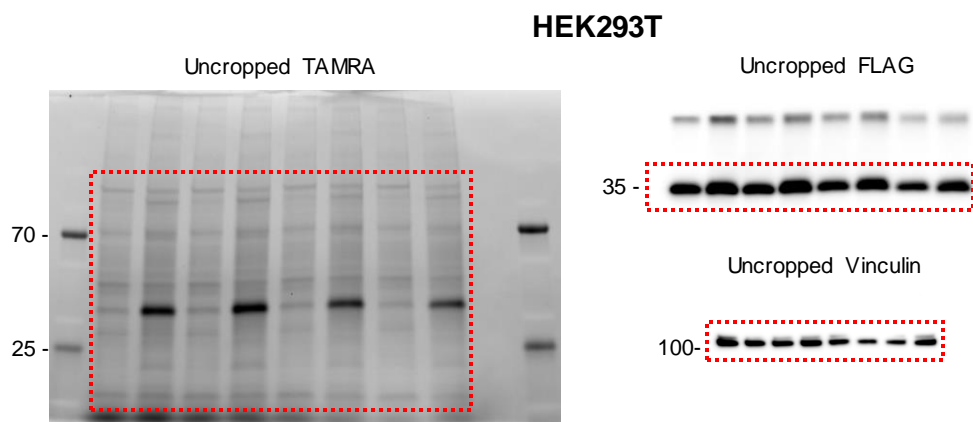

Figure A25. Uncropped gels and westerns for Extended Data Figure 6A. Areas within red borders are within the supplementary figure.

# Extended Data Figure 6D

## PANC1

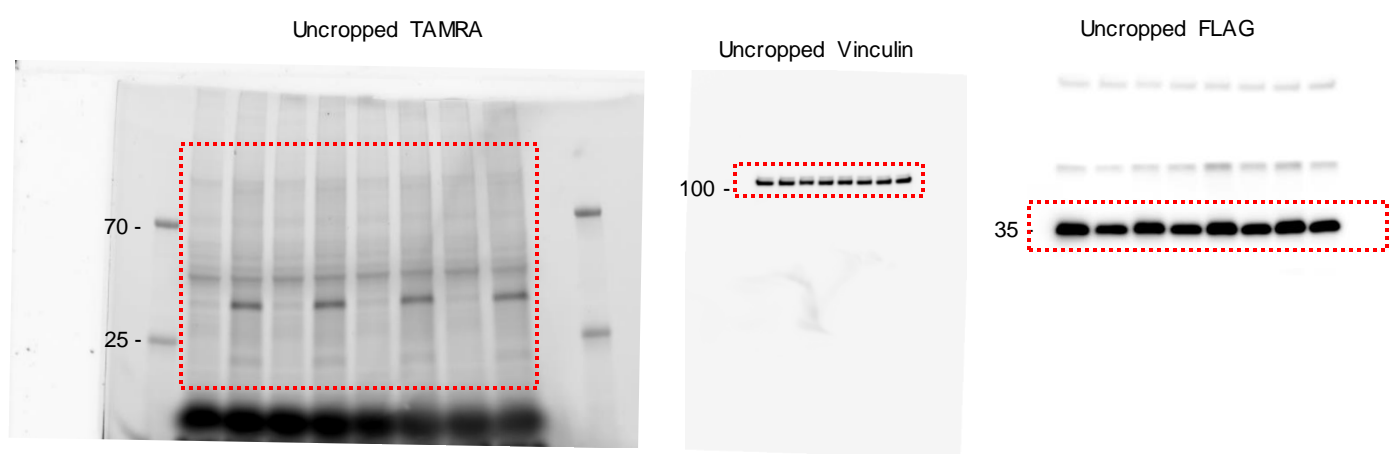

Figure A26. Uncropped gels and westerns for Extended Data Figure 6D. Areas within red borders are in the supplementary figure.

# Extended Data Figure 6E

## MDA-MB-231

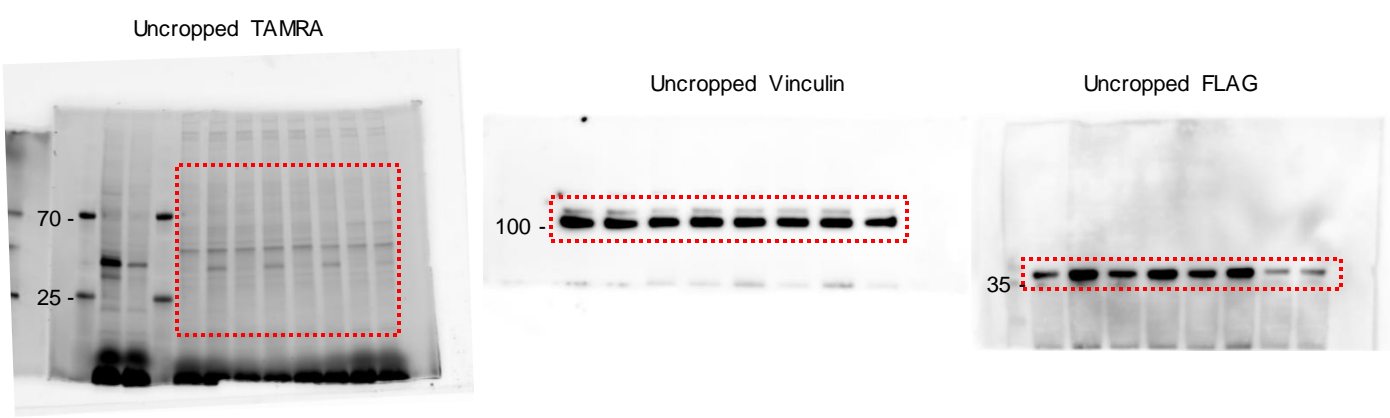

Figure A27. Uncropped gels and westerns for Extended Data Figure 6E. Areas within red borders are in the supplementary figure.



**Extended Data Figure 3E**

18-Bz: Time Course  
In-Gel Fluorescence

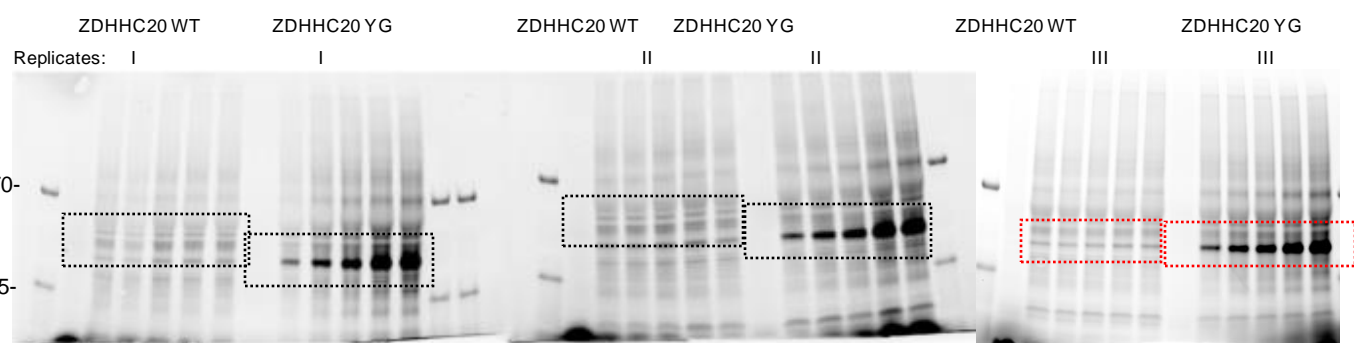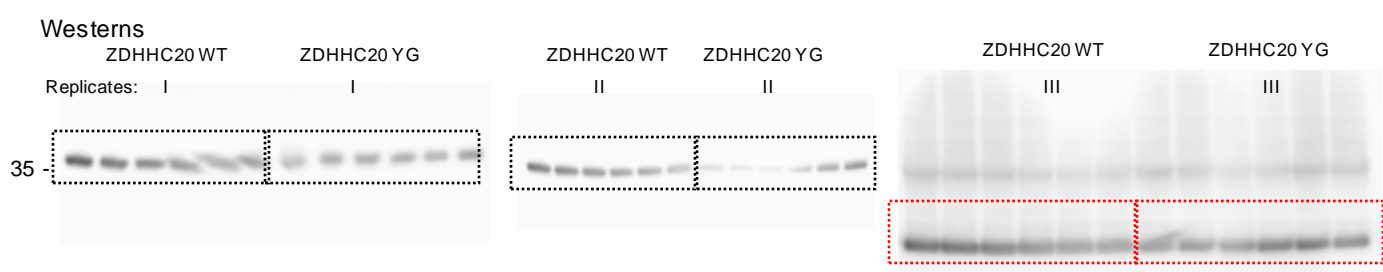

Figure A28. Uncropped gels and westerns for Extended Data Figure 3E. Areas within red borders are in the supplementary figure.

**Extended Data Figure 3G**

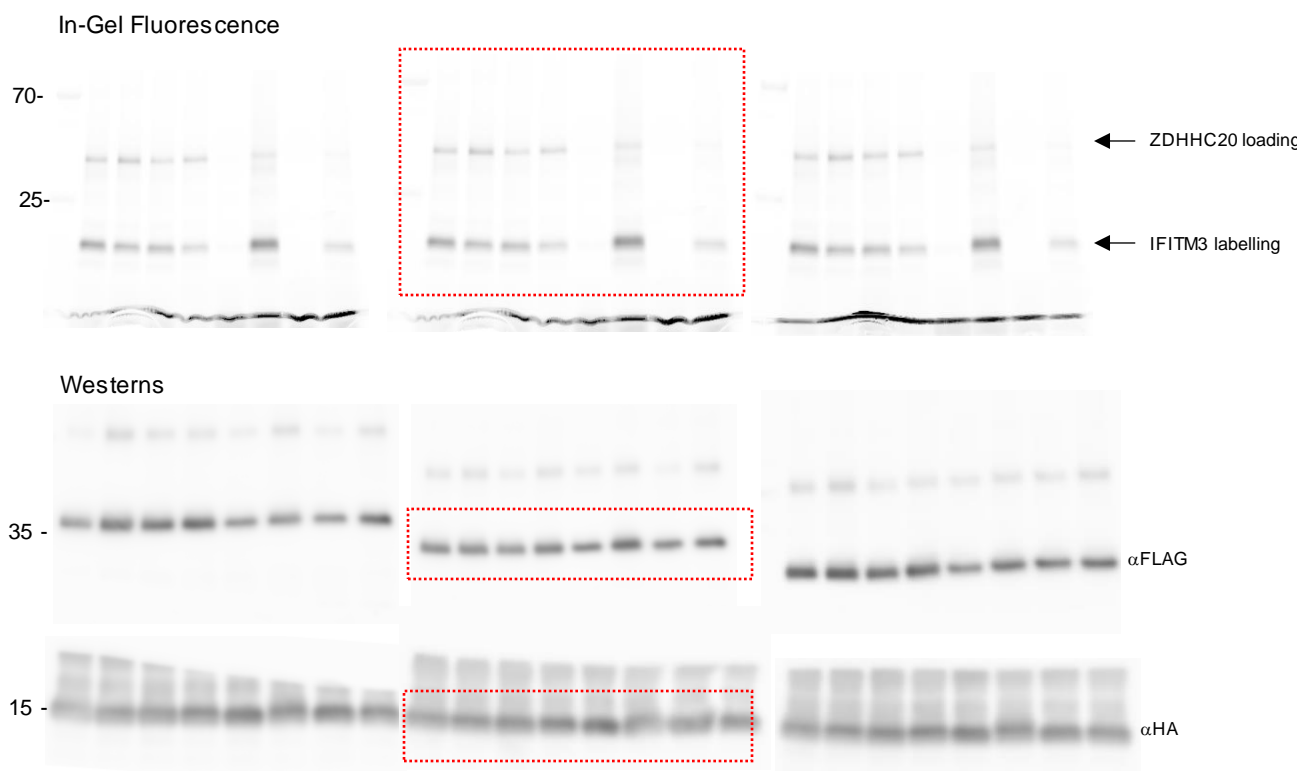

Figure A29. Uncropped gels and westerns for Extended Data Figure 3G. Areas within red borders are in the supplementary figure.

# Extended Data Figure 6G

Validation of HA-PTRH2 S-acylation by ZDHHC20

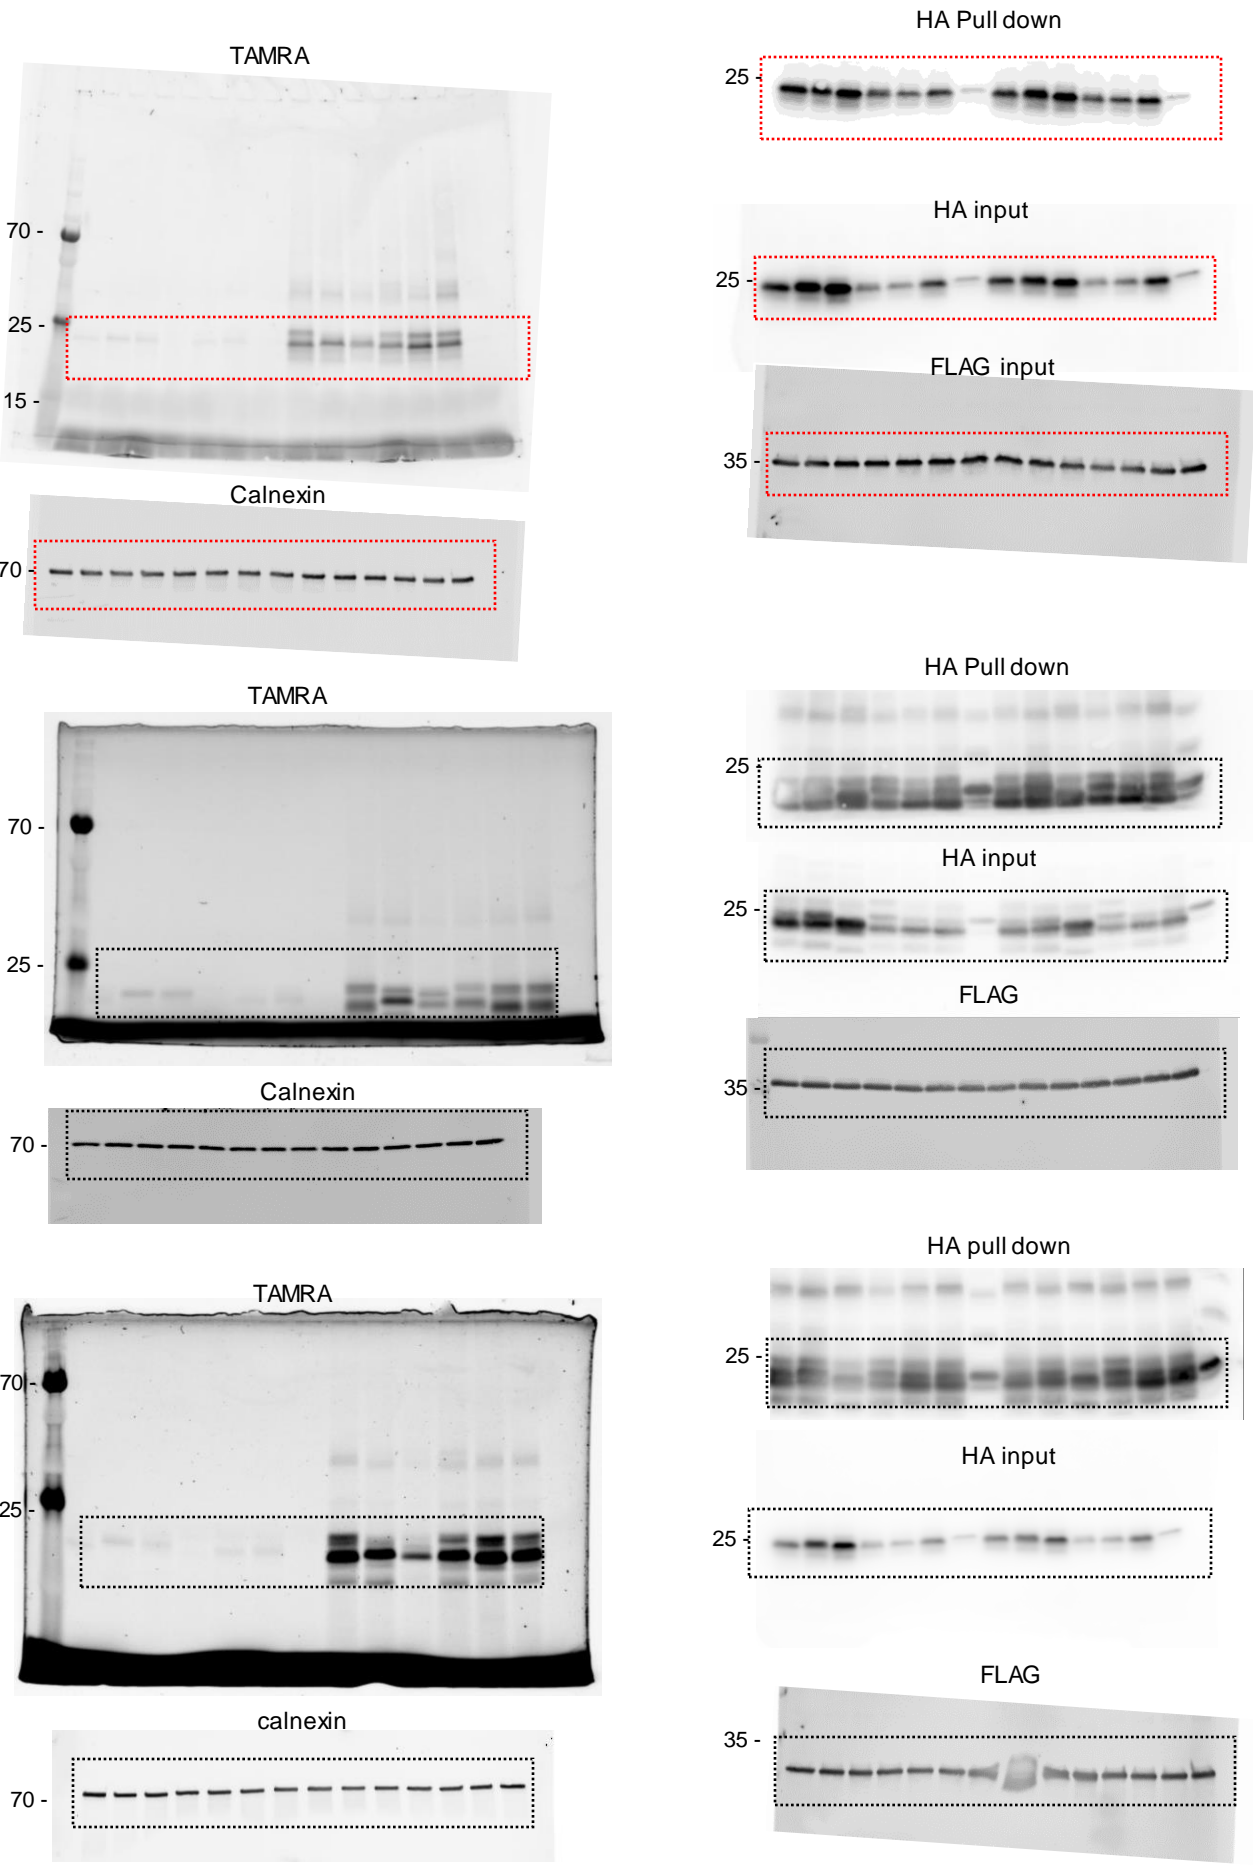

Figure A30. Uncropped gels and westerns for Extended Data Figure 6G. Areas within red borders are in the supplementary figure.

### Extended Data Figure 7A

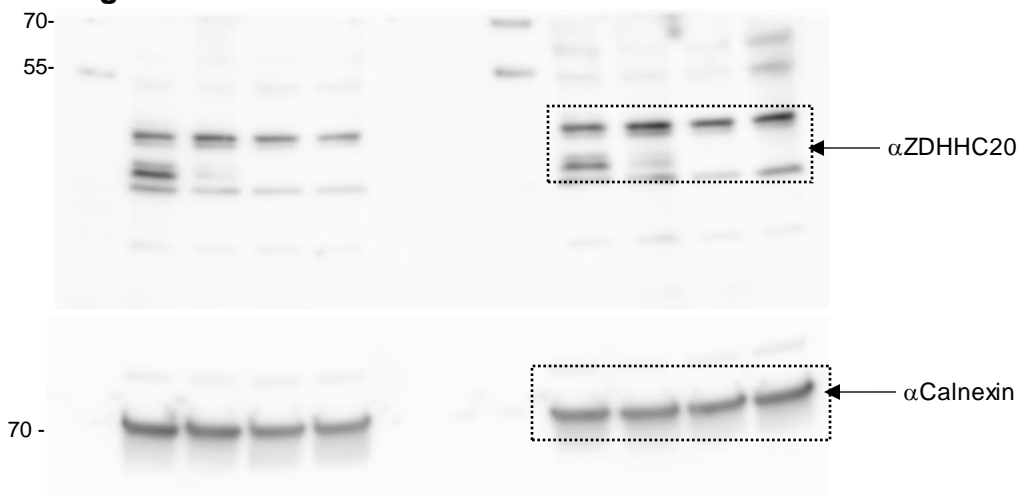

Figure A31. Uncropped westerns for Extended Data Figure 7A. Areas within red borders are in the supplementary figure.

### Extended Data Figure 7B

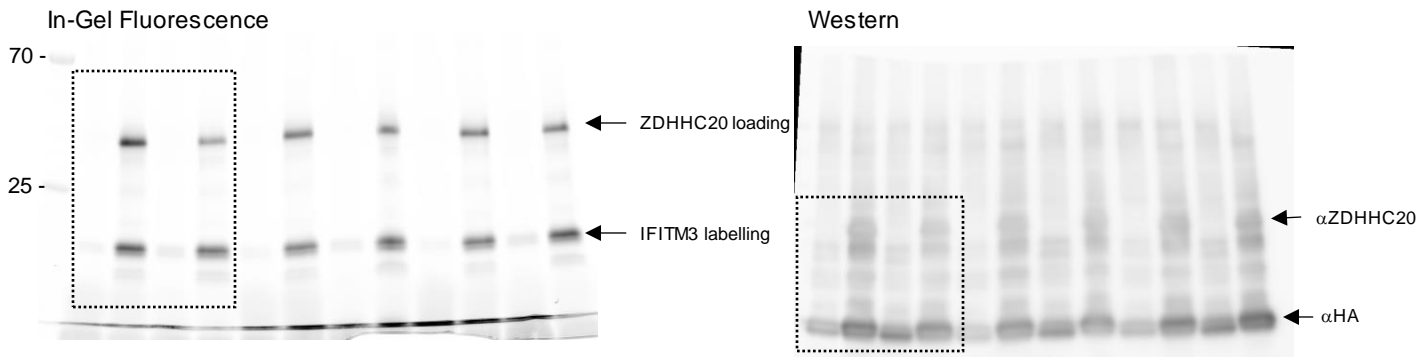

Figure A32. Uncropped gels and westerns for Extended Data Figure 7B. Areas within red borders are in the supplementary figure.

### Extended Data Figure 7D

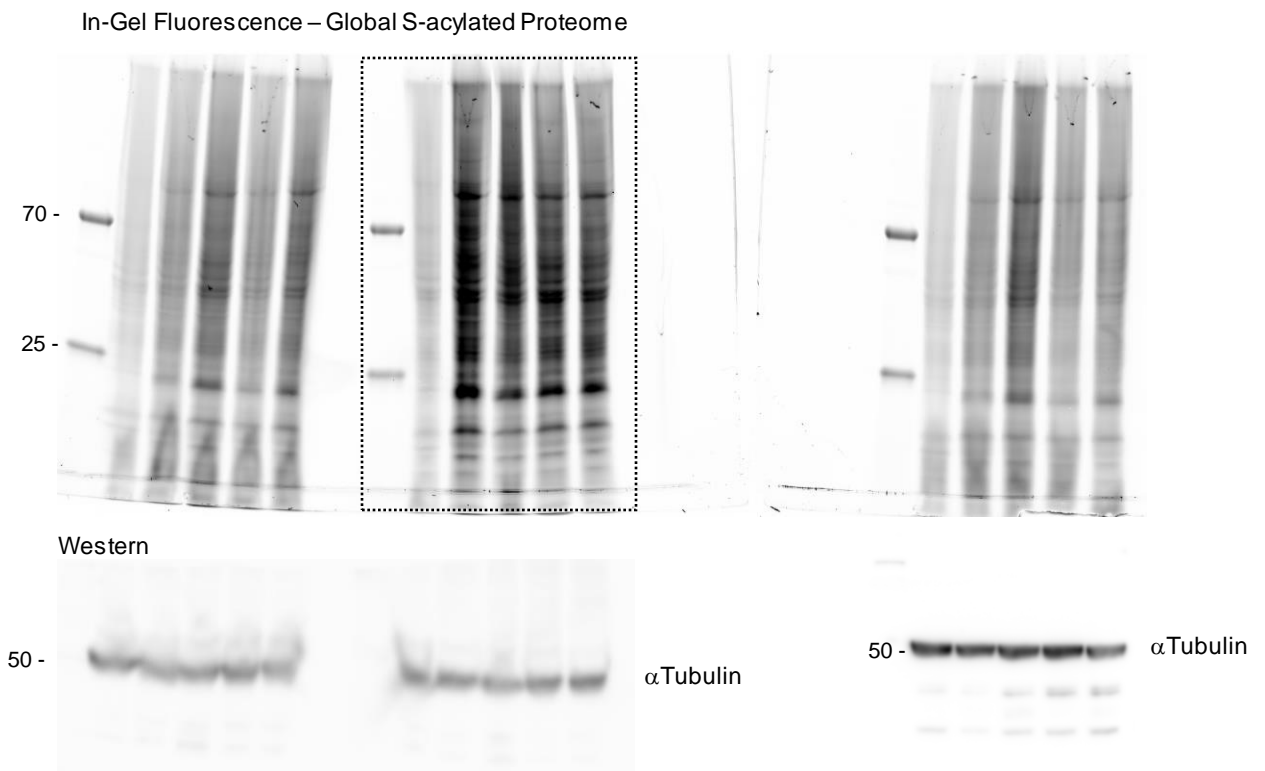

Figure A33. Uncropped gels Extended Data Figure 7D. Areas within red borders are in the supplementary figure.

# Extended Data Figure 8B

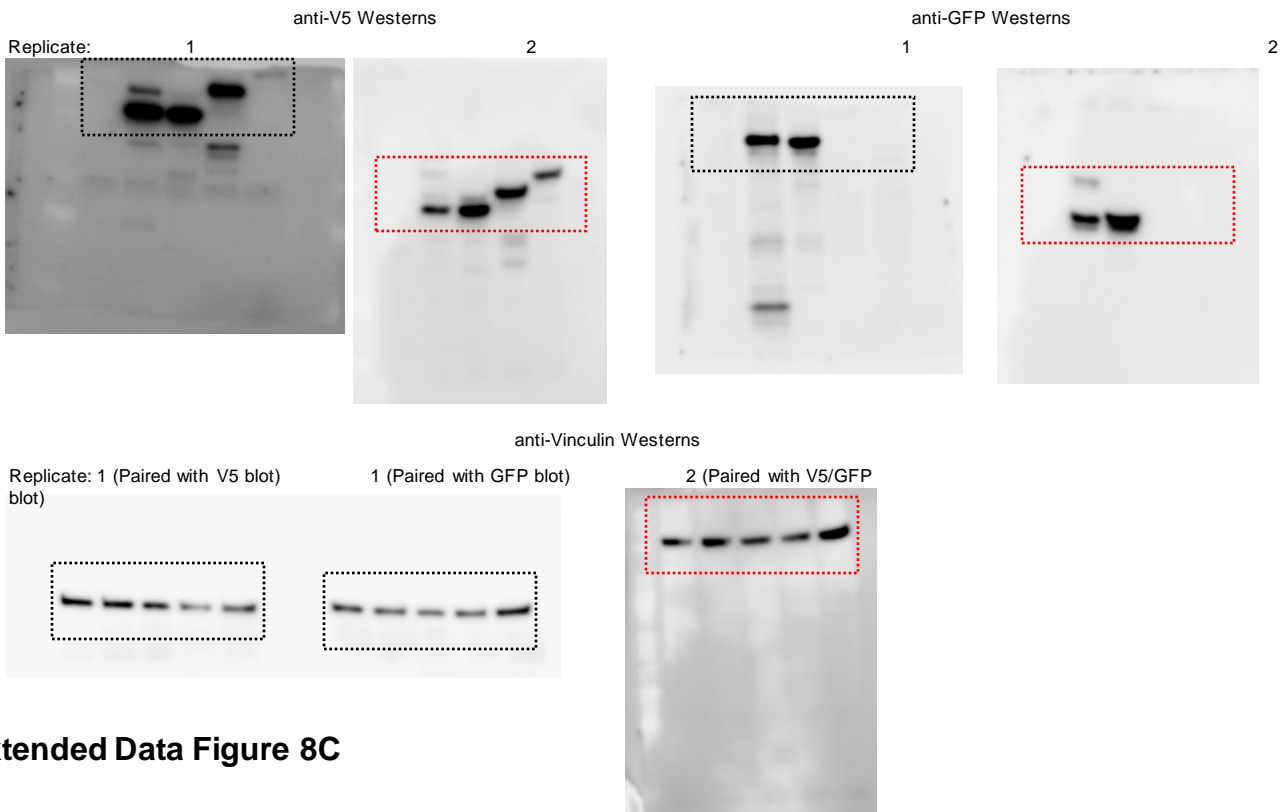

# Extended Data Figure 8C

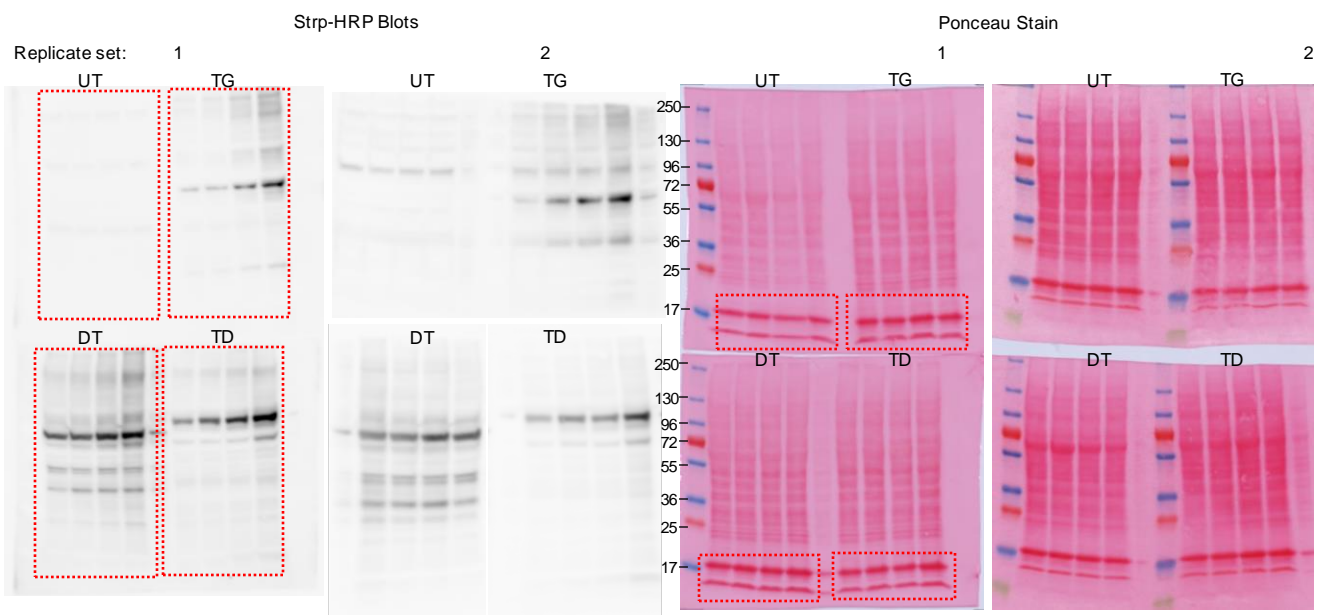

Figure A34. Uncropped westerns and blots for Extended Data Figure 8B-C. Areas within red borders are in the supplementary figure.

# Extended Data Figure 9A-G

FLAG-ZDHHC3 (41 kDa): WT vs M (I182G)

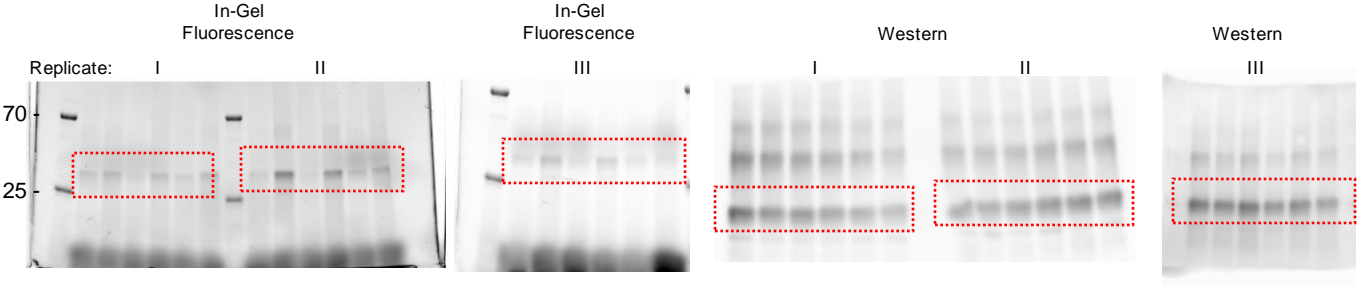

FLAG-ZDHHC7 (38 kDa): WT vs M (L57G)

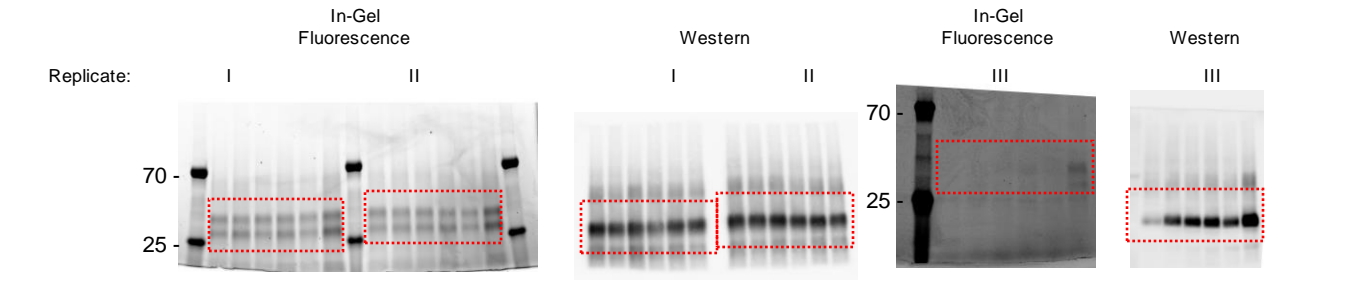

FLAG-ZDHHC11 (49 kDa): WT vs M (M181A)

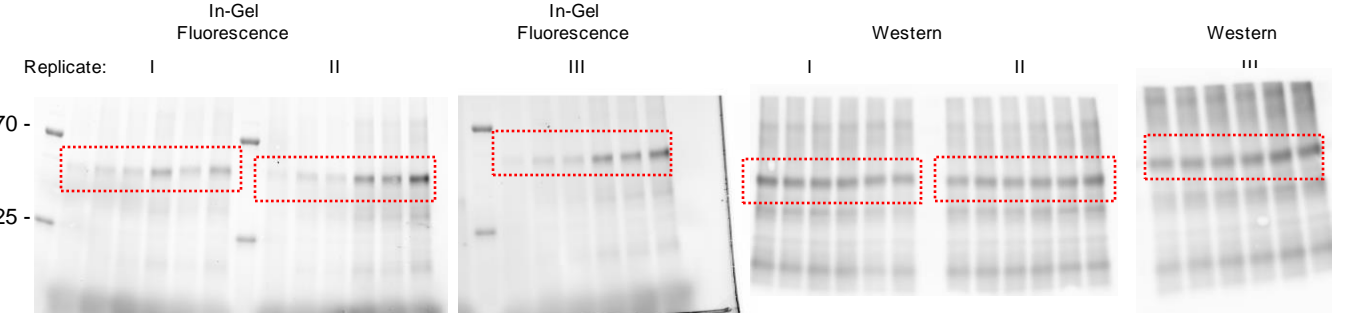

FLAG-ZDHHC15 (39 kDa): WT vs M (Y184G)

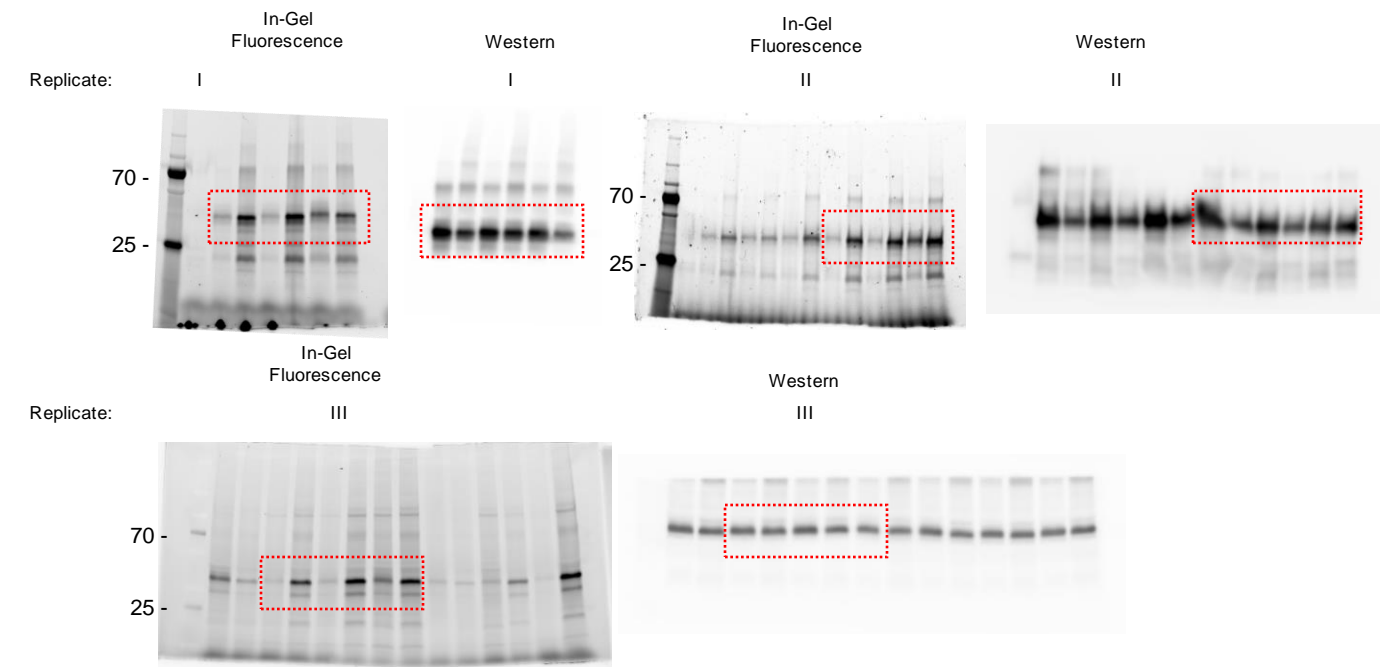

Figure A35. Uncropped gels and westerns for Extended Data Figure 9A-G. Areas within red borders are in the supplementary figure.

# Extended Data Figure 9I

ZDHHC7, ZDHHC15, and ZDHHC 3 and ZDHHC11 NH<sub>2</sub>OH treatment

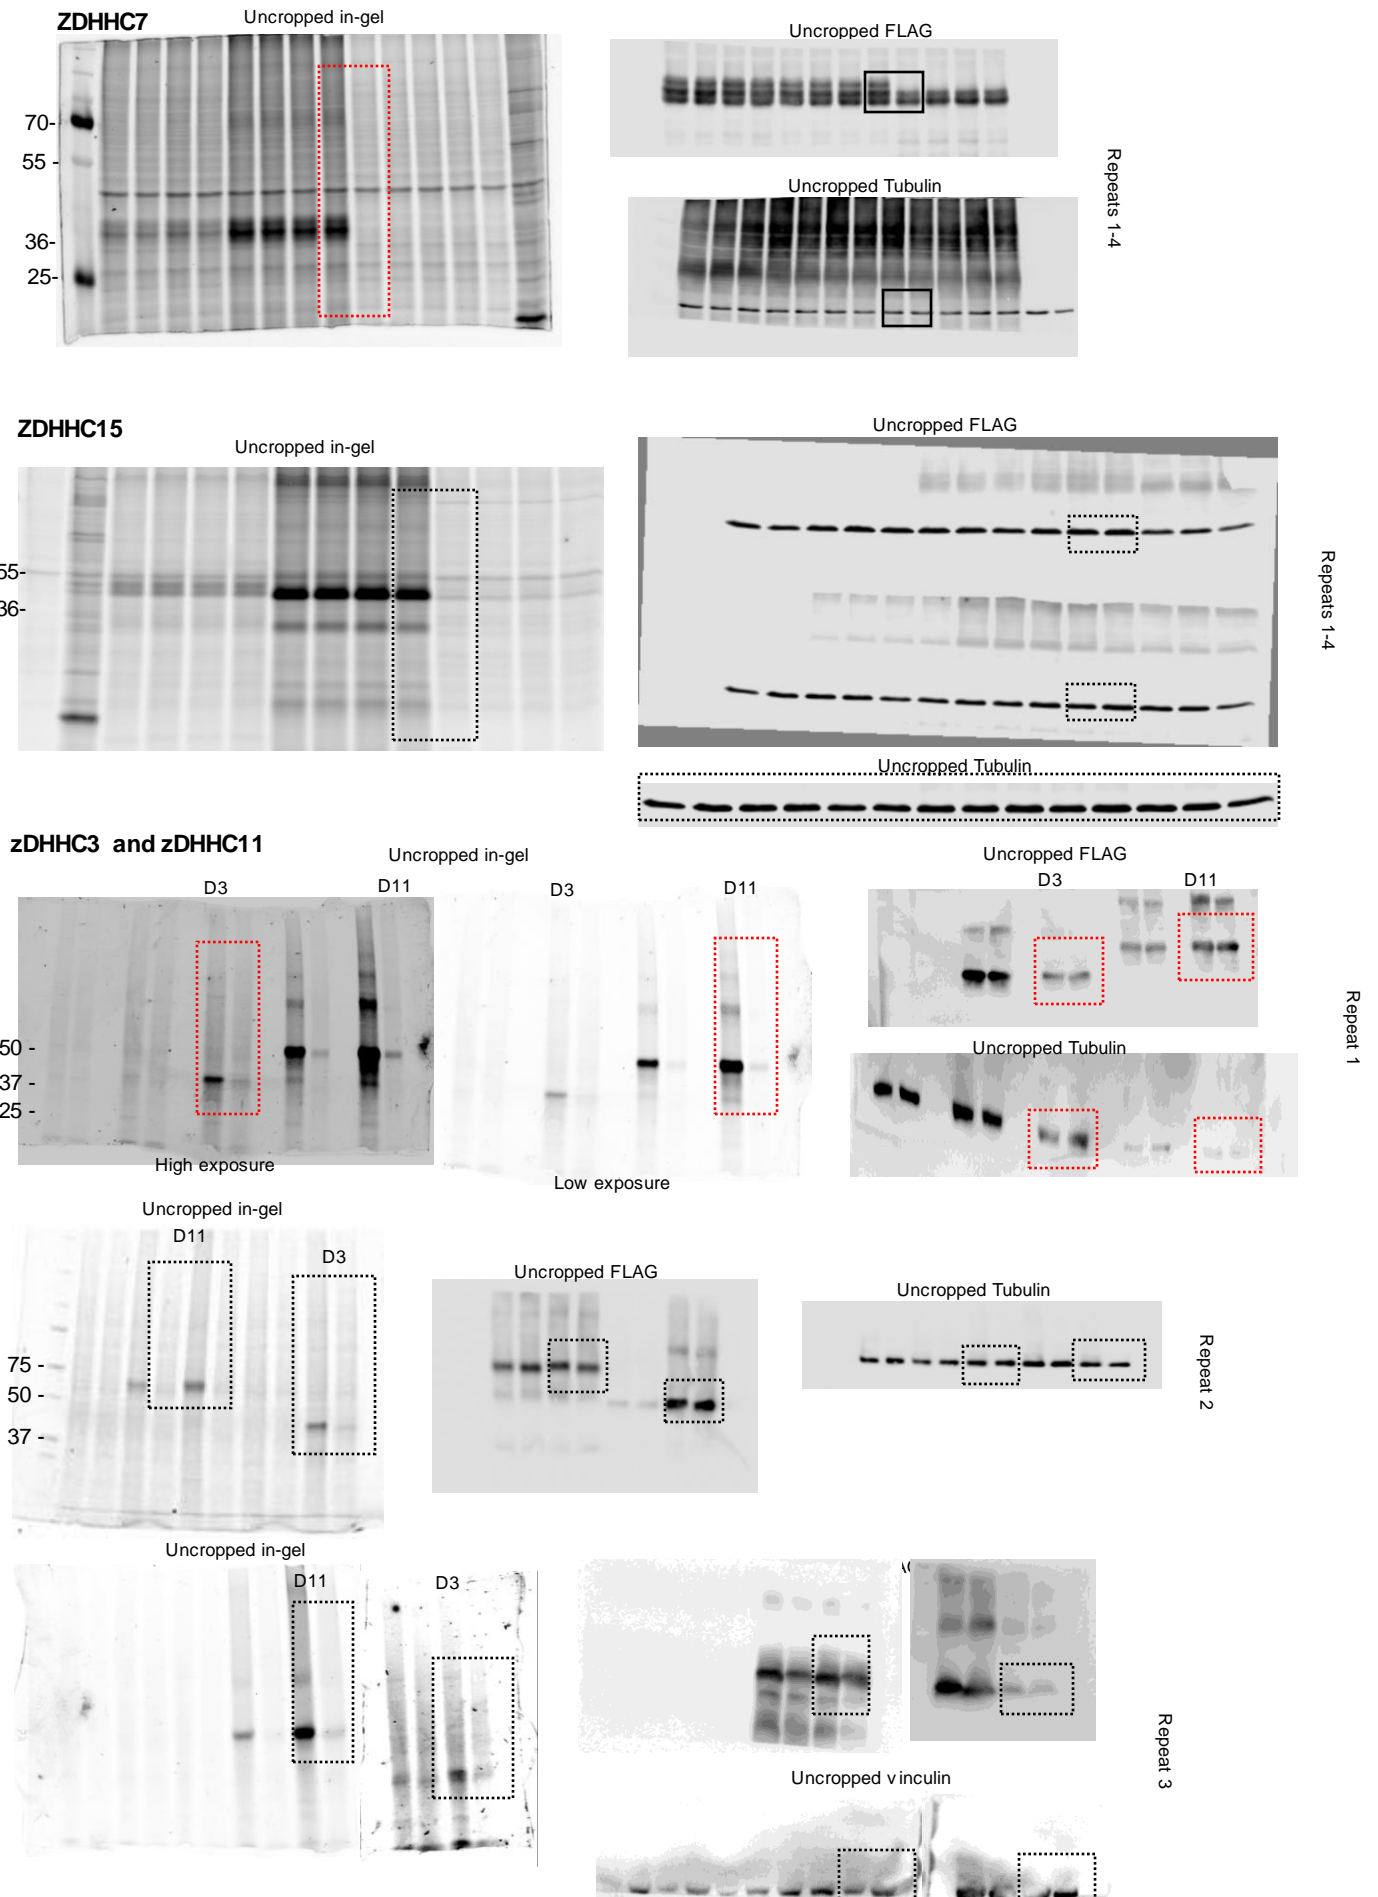

Figure A36. Uncropped gels and westerns for Extended Data Figure 8I. Areas within red borders are in the supplementary figure.

**Extended Data Figure 10 A-E**

**10A**

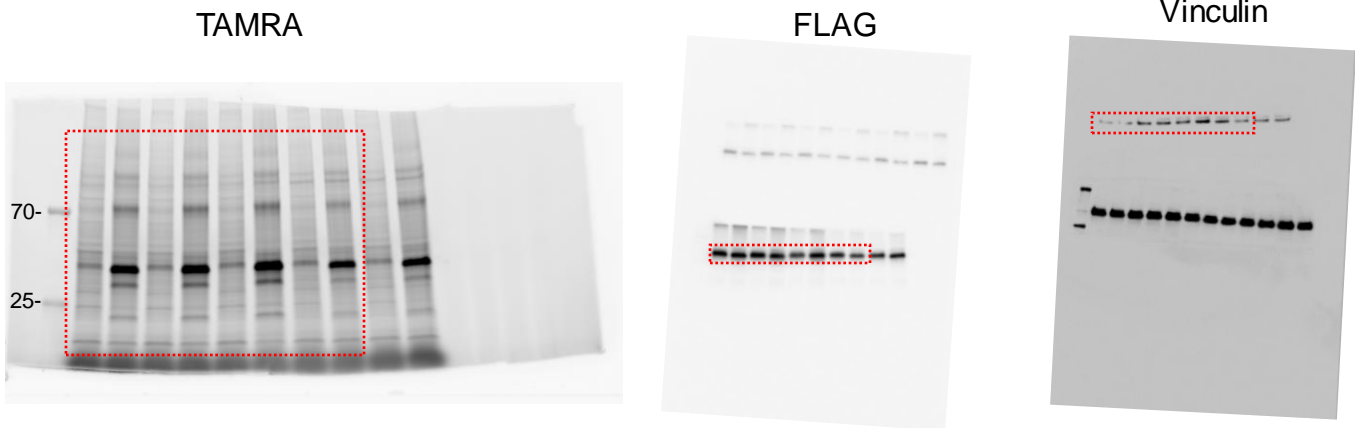

Figure A37. Uncropped gels and westerns for Extended Data Figure 9A. Areas within red borders are in the supplementary figure.

**10C**

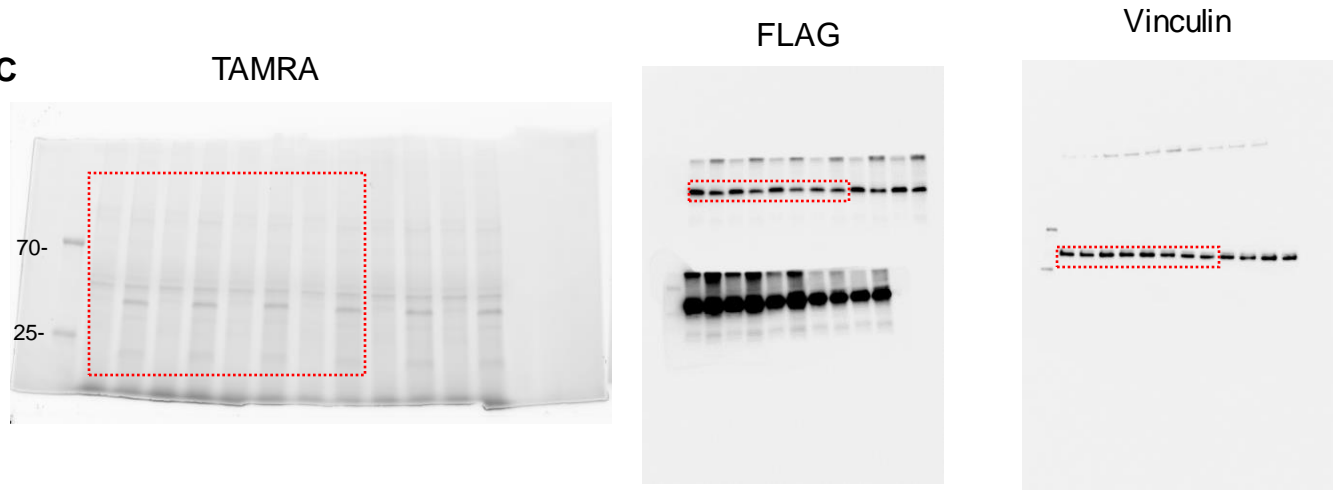

Figure A38. Uncropped gels and westerns for Extended Data Figure 9C. Areas within red borders are in the supplementary figure.

**10E**

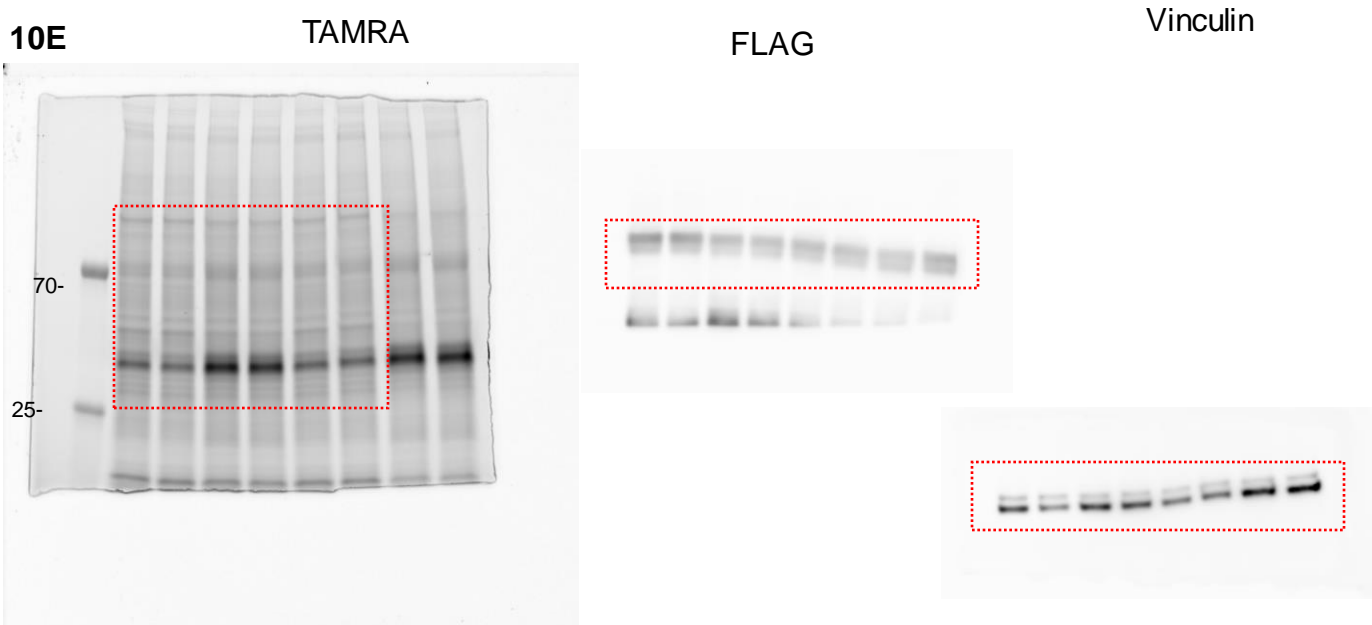

Figure A39. Uncropped gels and westerns for Extended Data Figure 9E. Areas within red borders are in the supplementary figure.
